# Supplementary material
Source: PubMed Central journal article supplement (PMC3832264)

# Supporting Information

## **Benzannulation via the Reaction of Ynamides and Vinylketenes. Application to the Synthesis of Highly Substituted Indoles**

Tin Yiu Lam, Yu-Pu Wang, and Rick L. Danheiser\*

*Department of Chemistry  
Massachusetts Institute of Technology  
Cambridge, Massachusetts 02139*

E-mail: danheiser@mit.edu

### **Table of Contents**

<sup>1</sup>H NMR and <sup>13</sup>C NMR Spectra

S2-S55

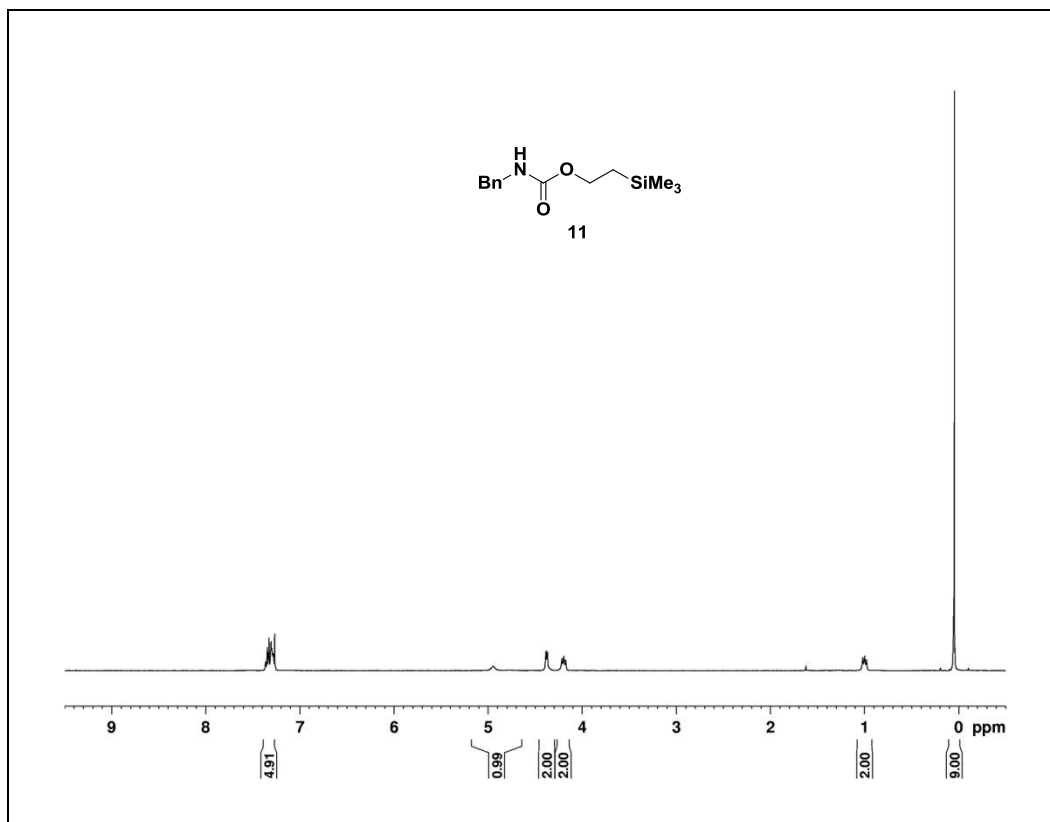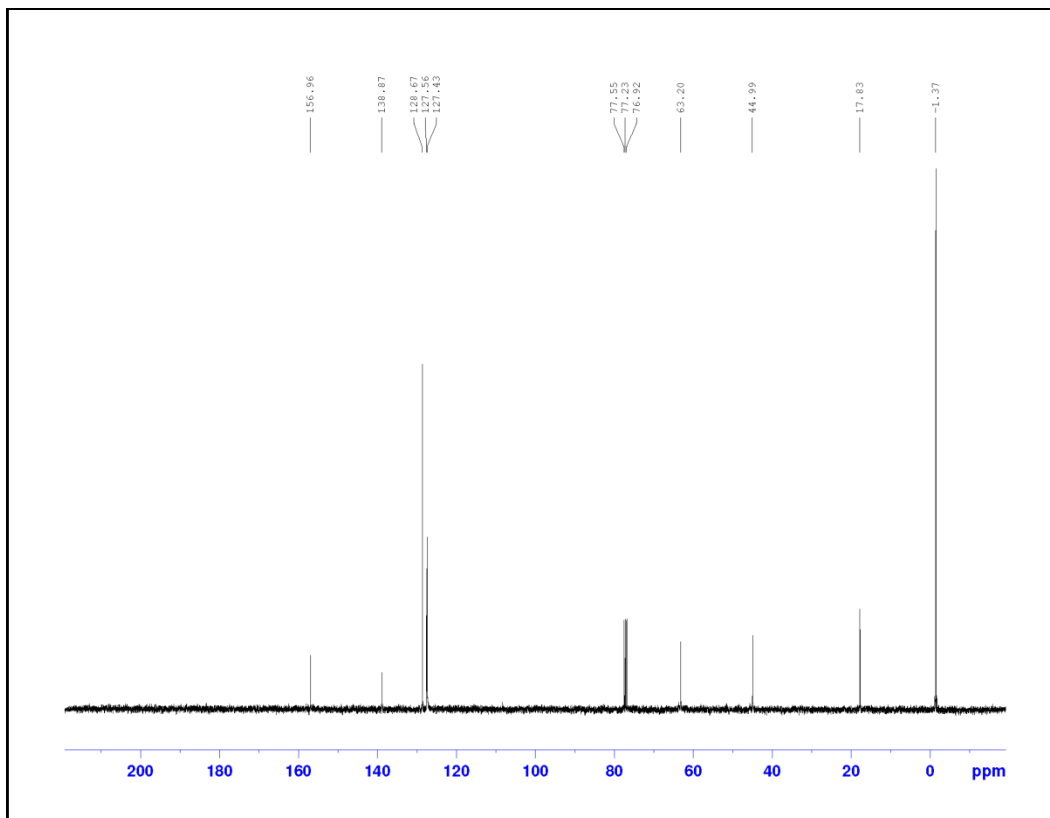

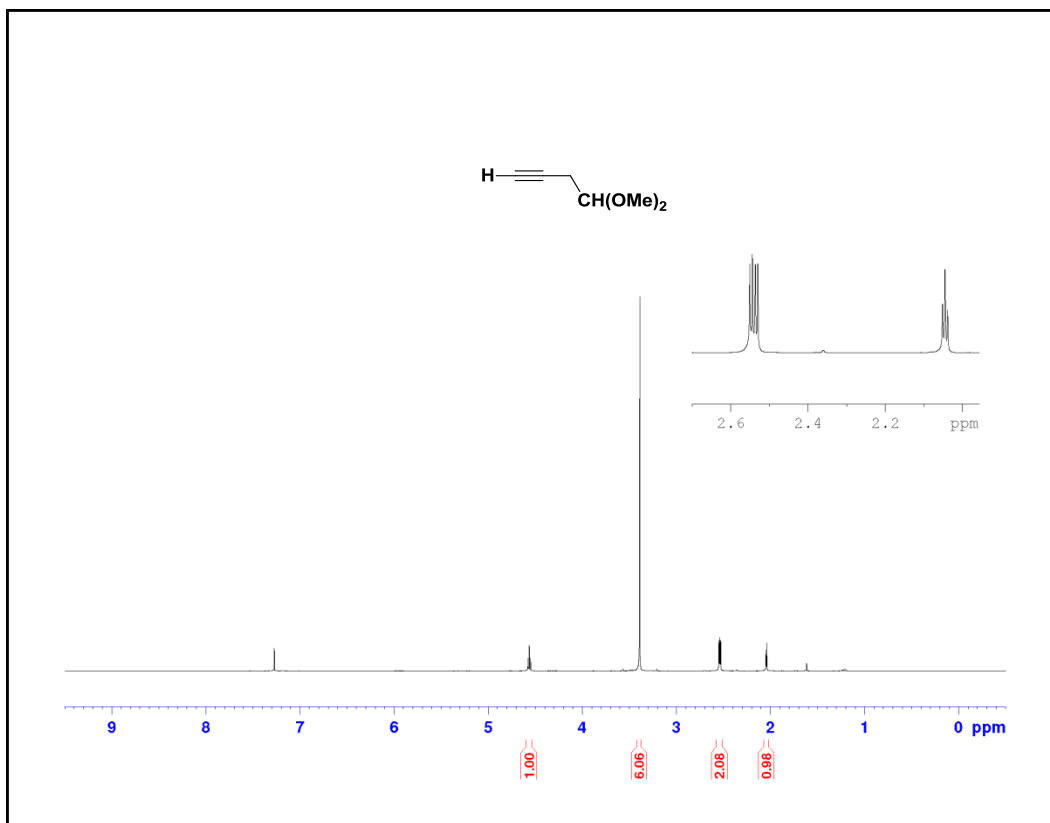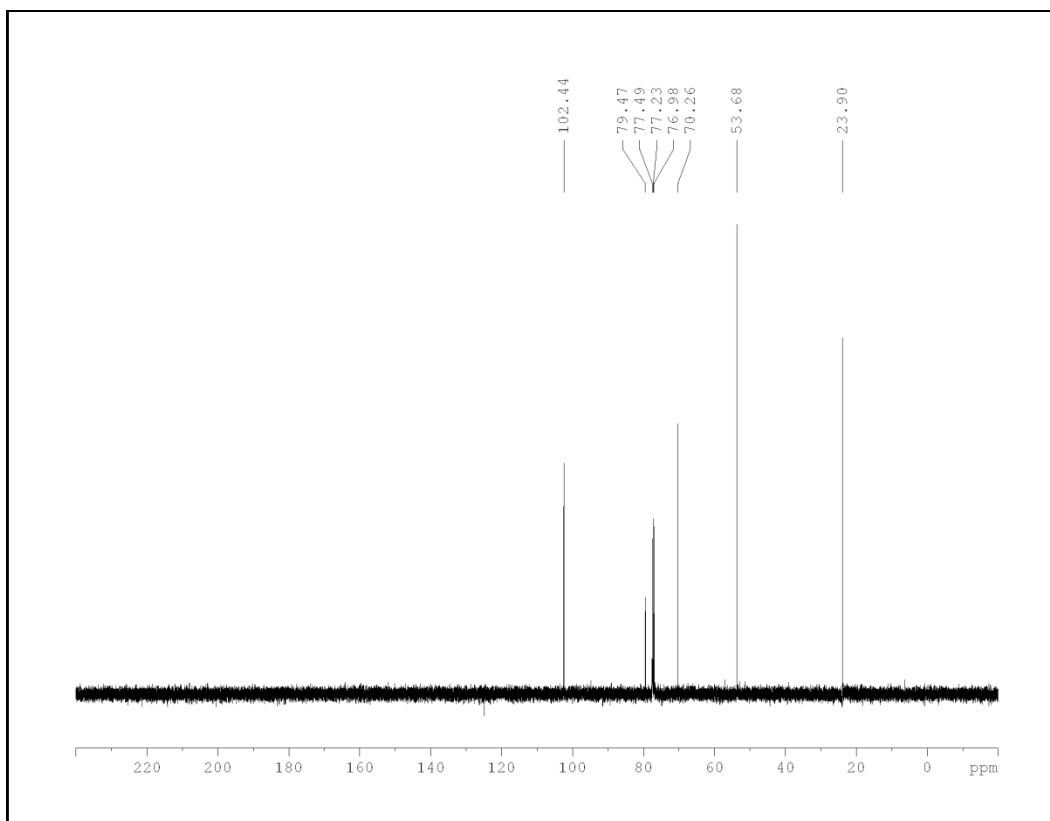

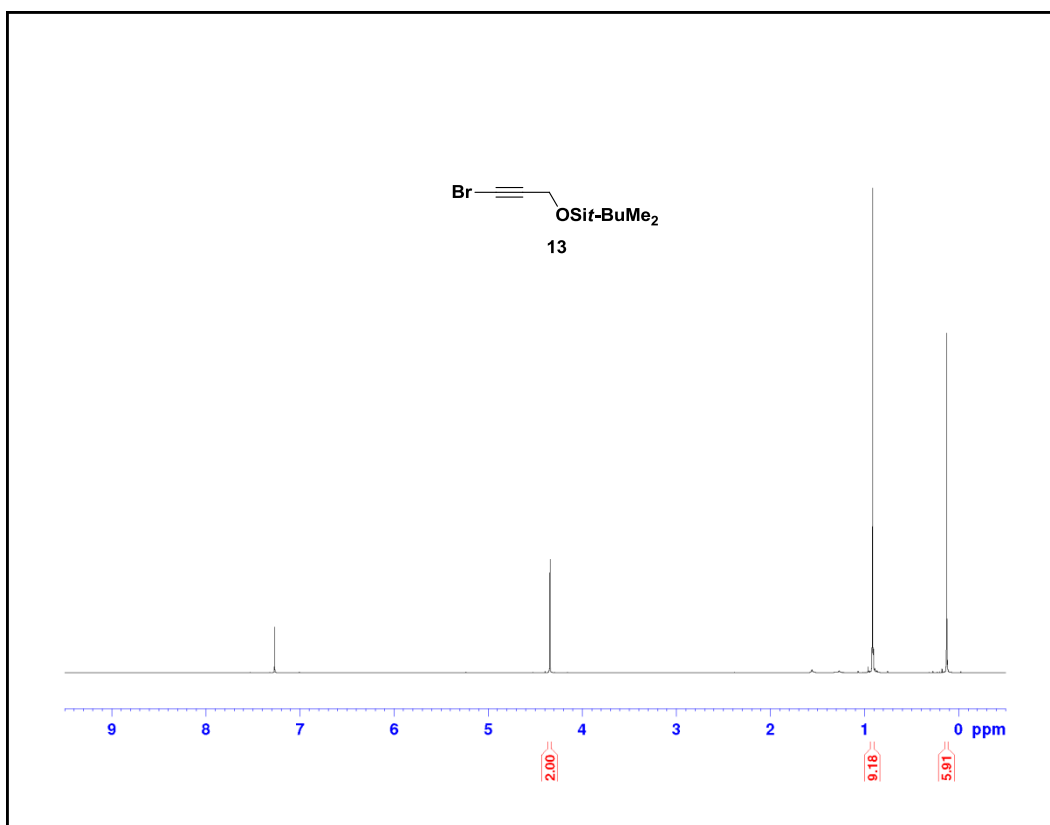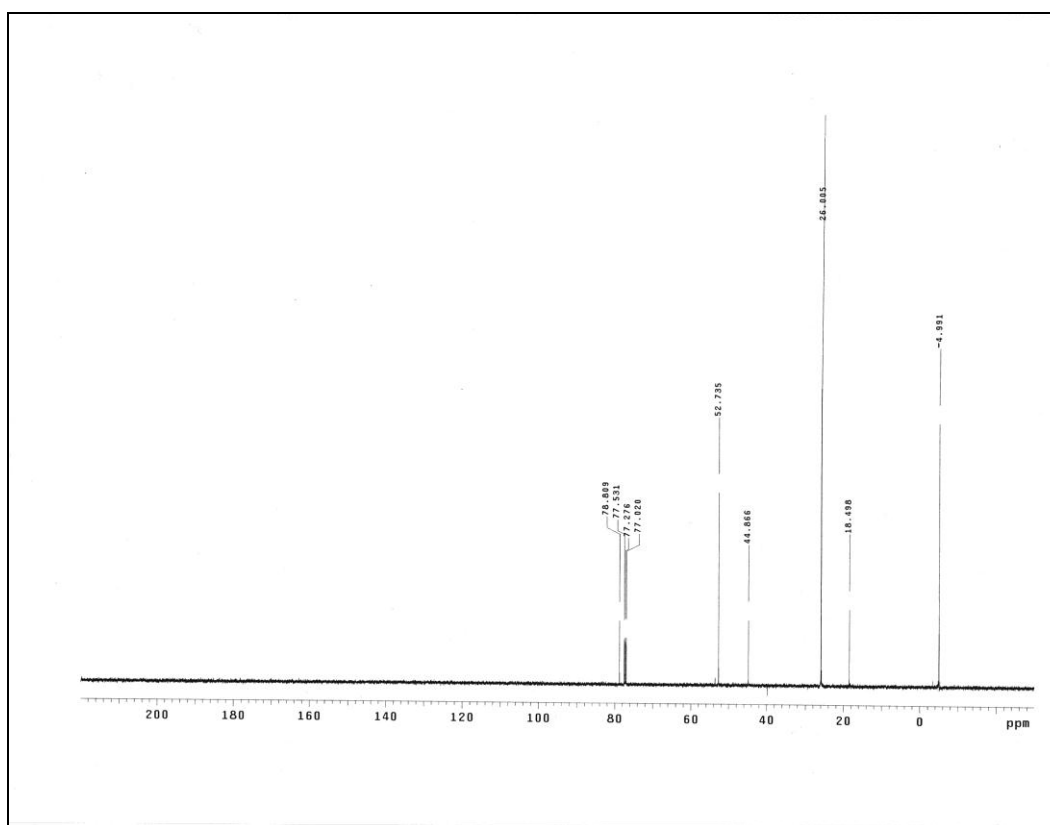

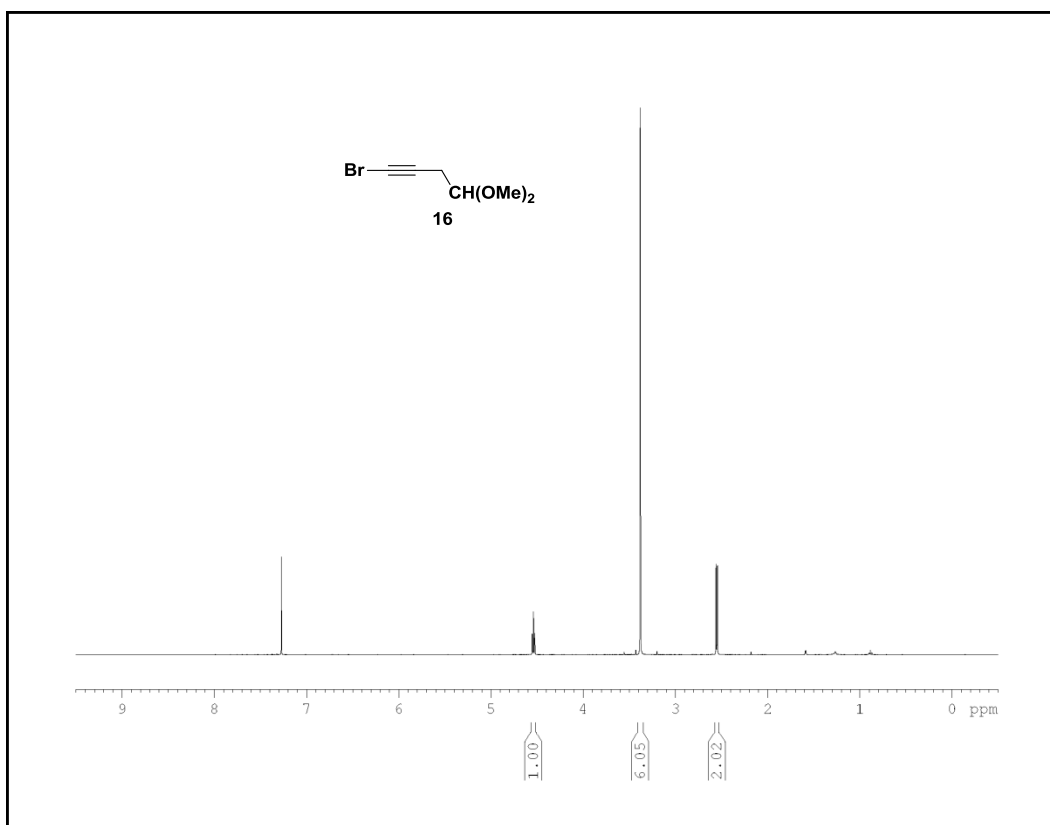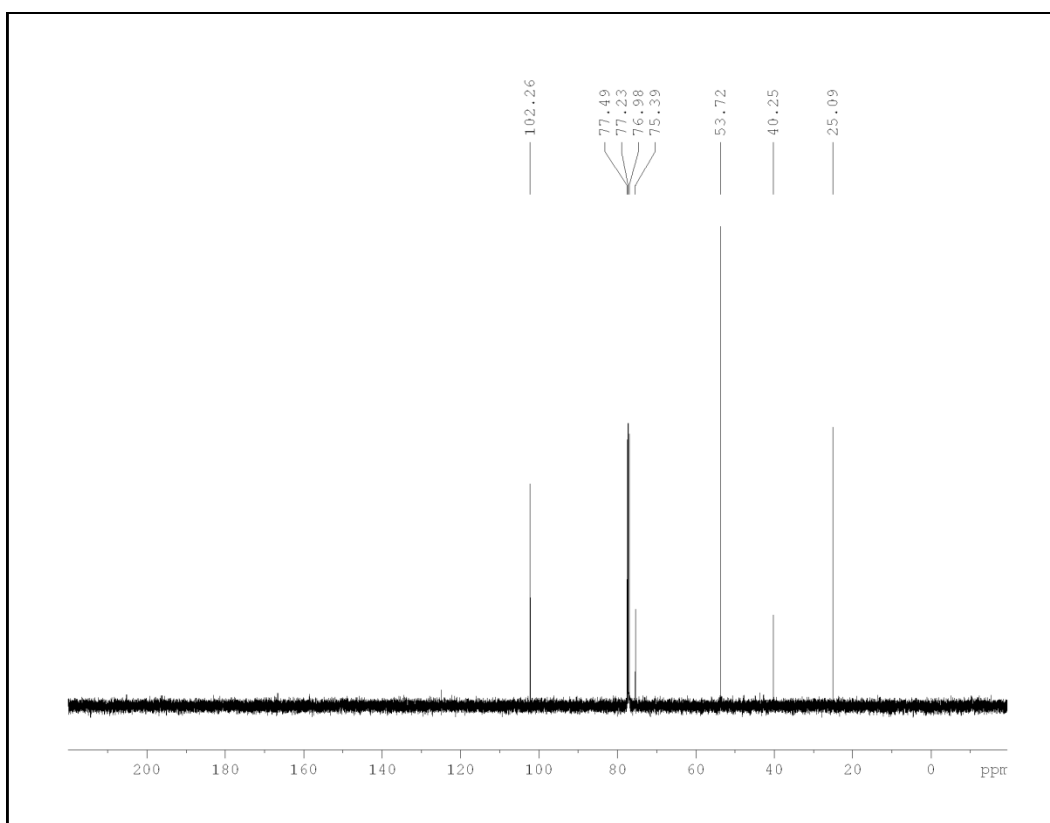

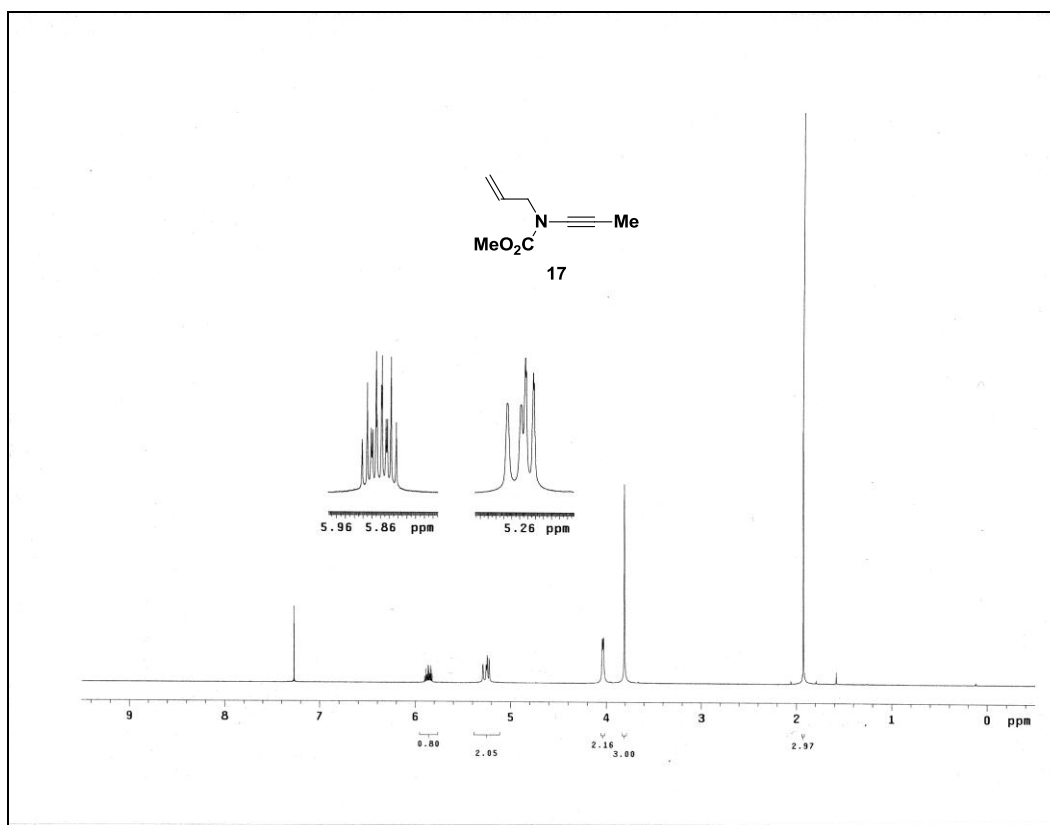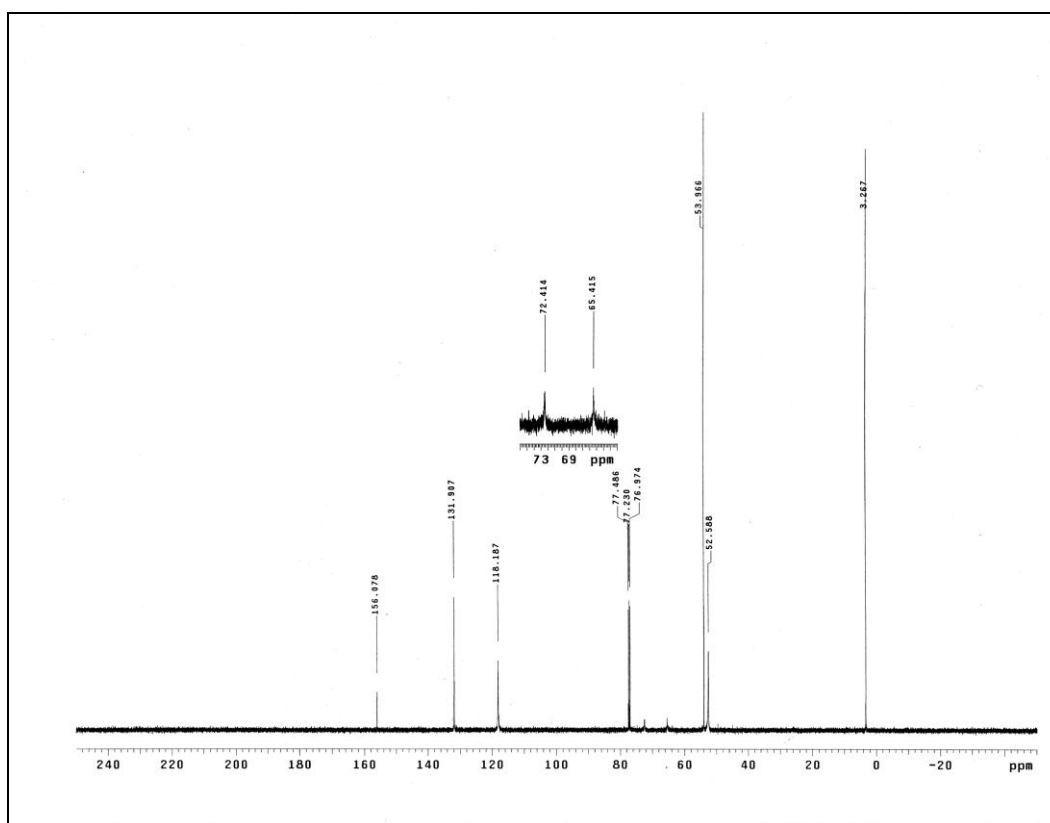

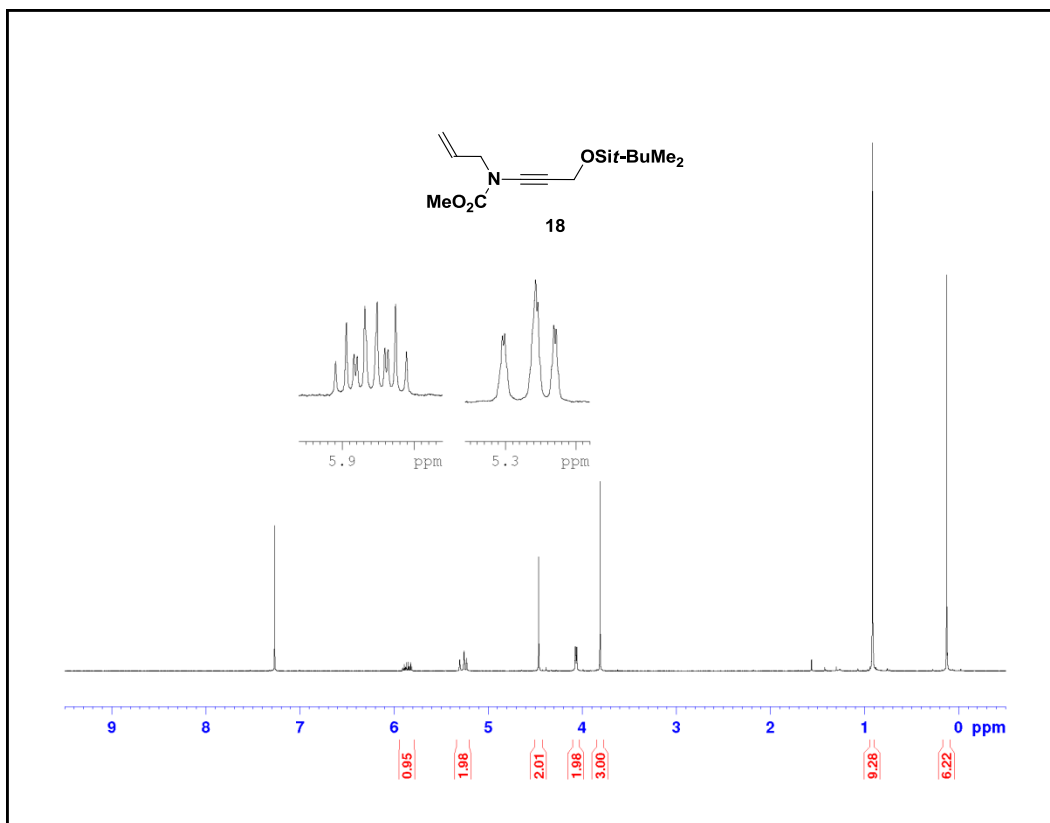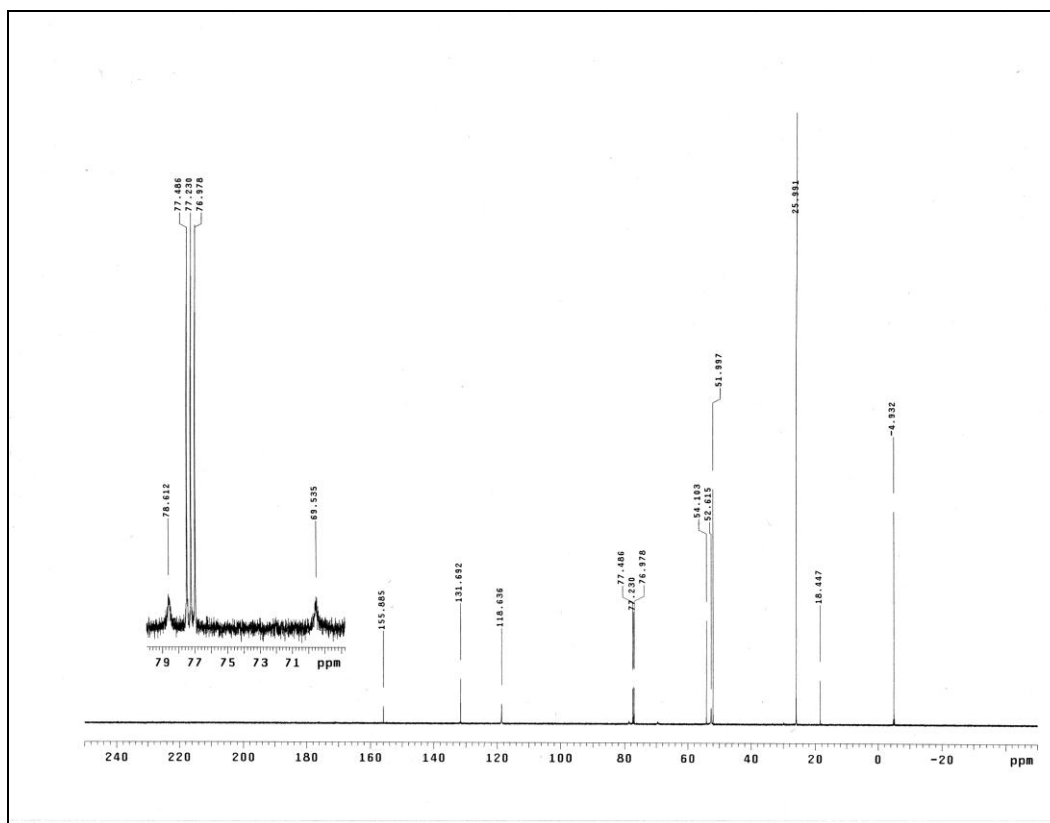

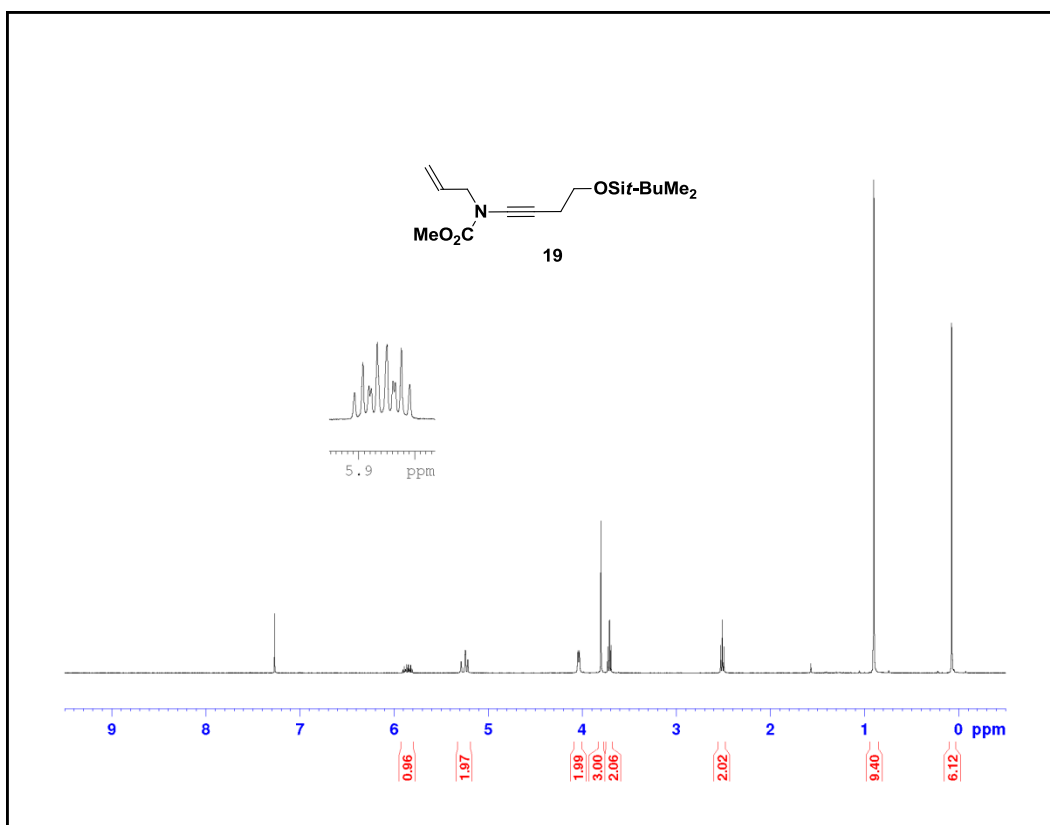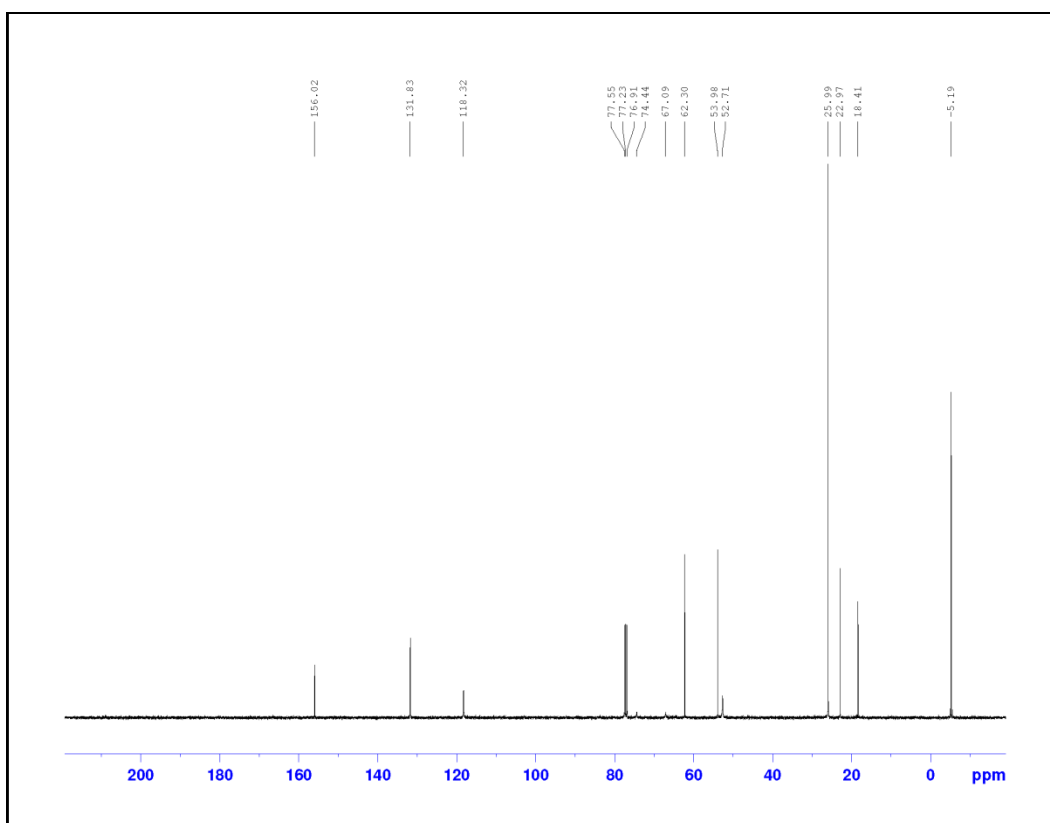



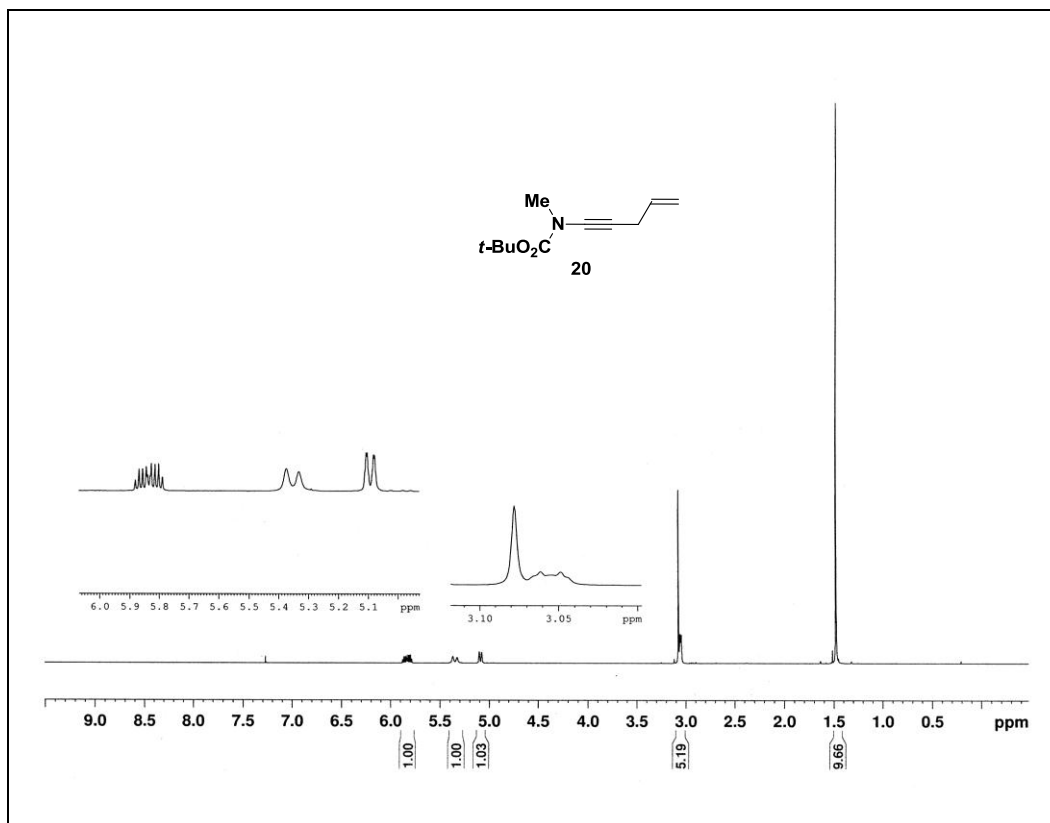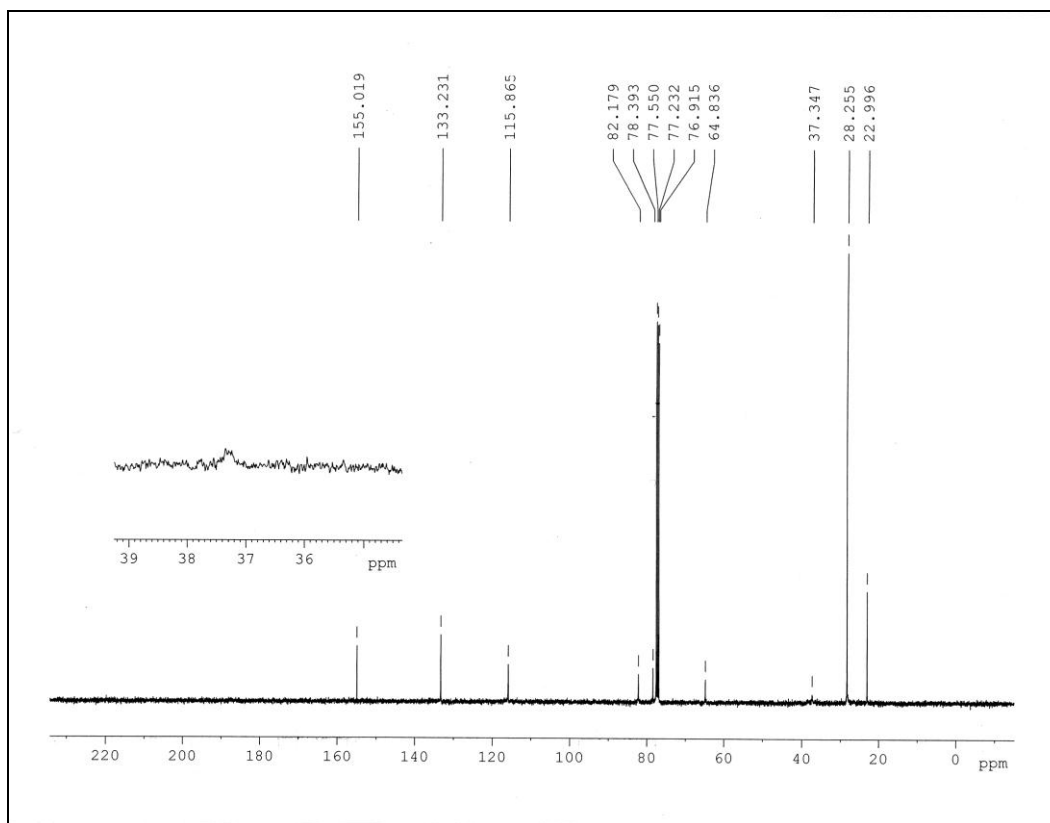

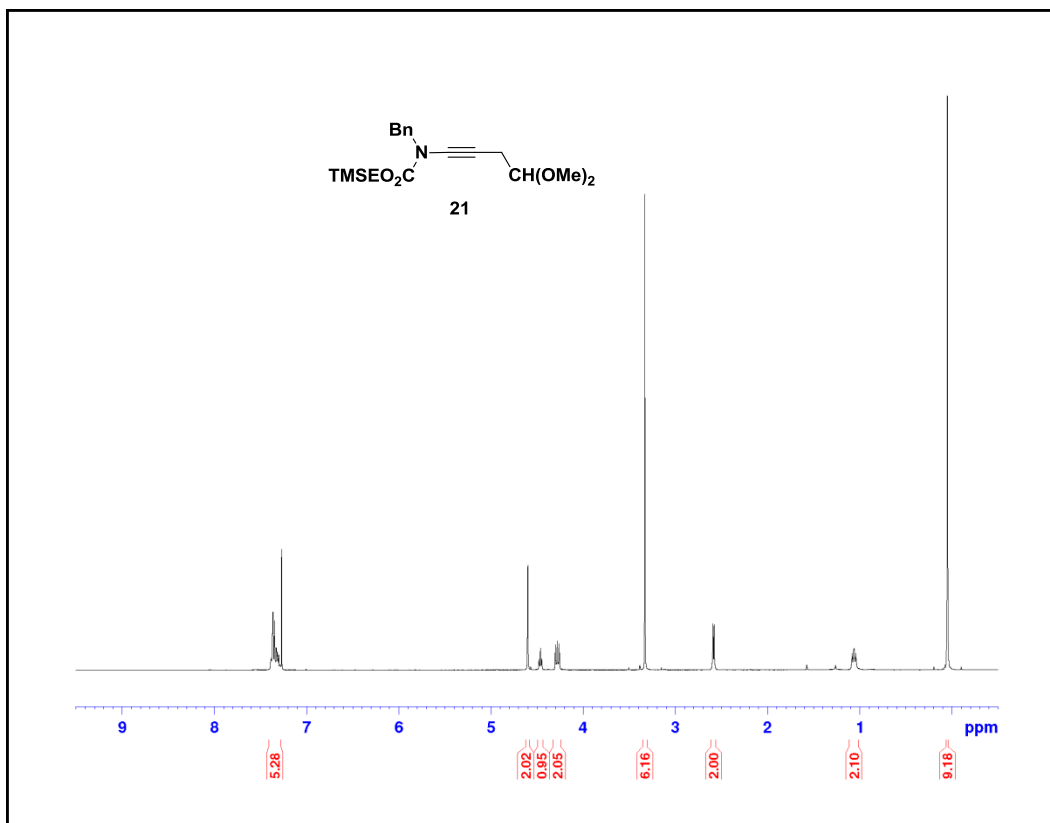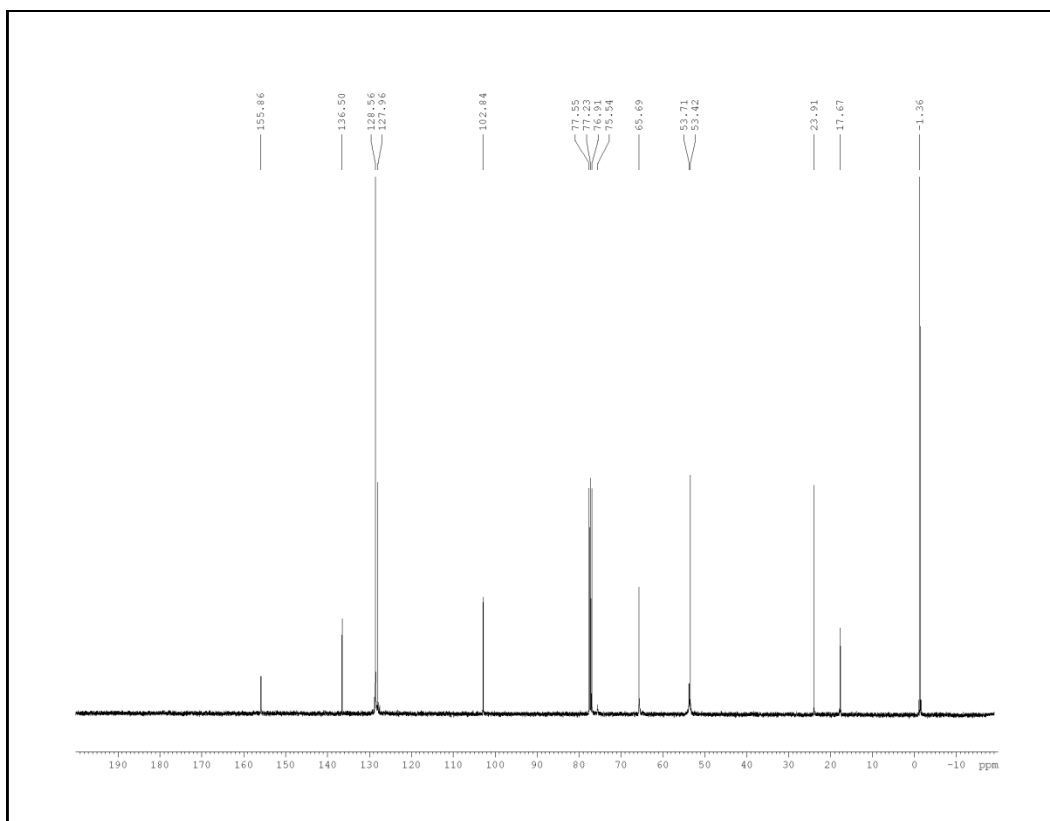

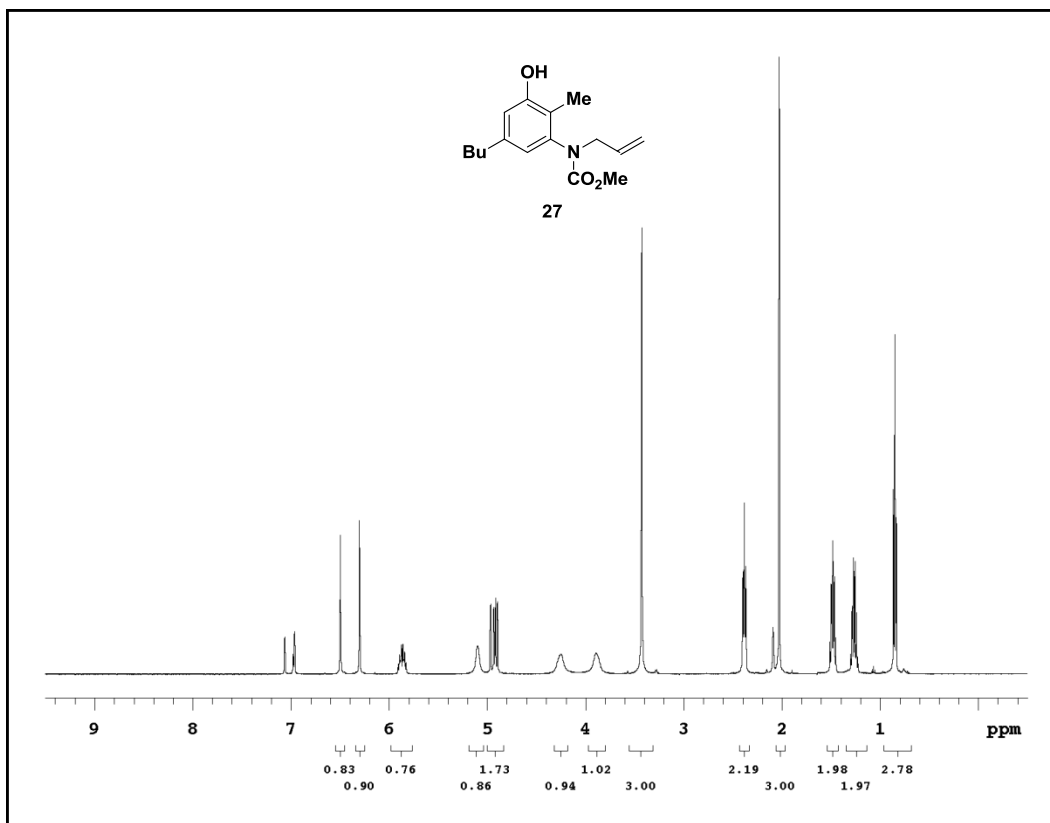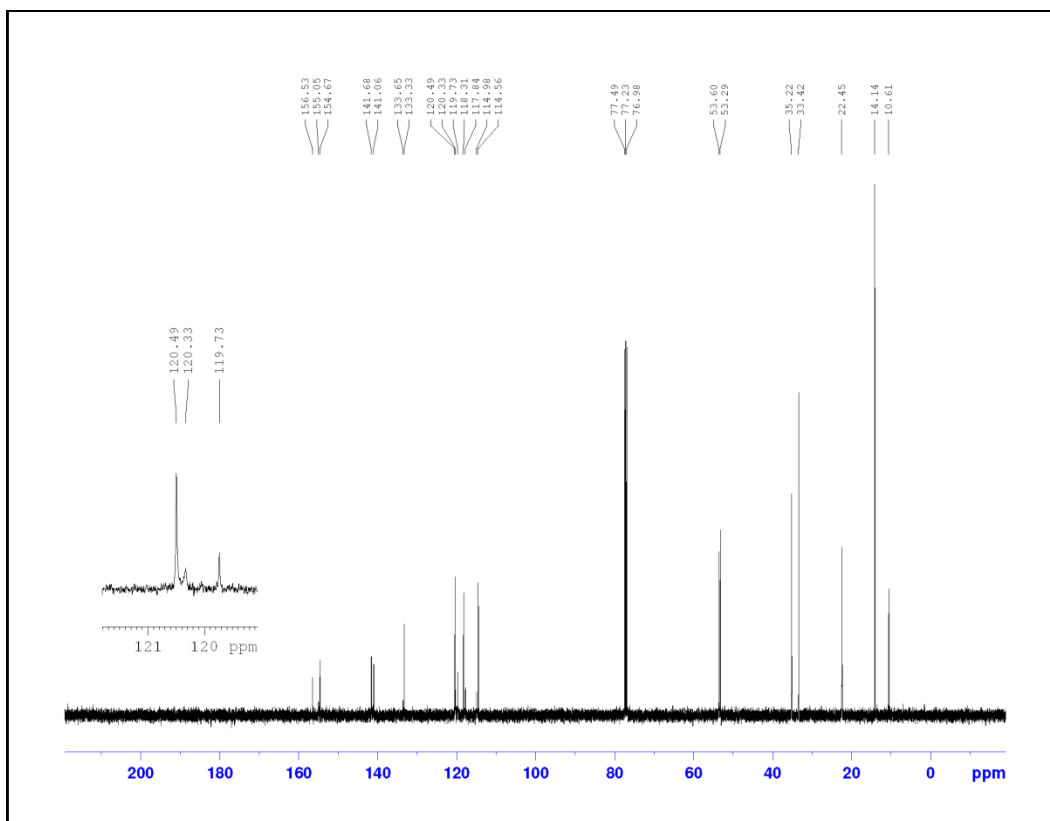

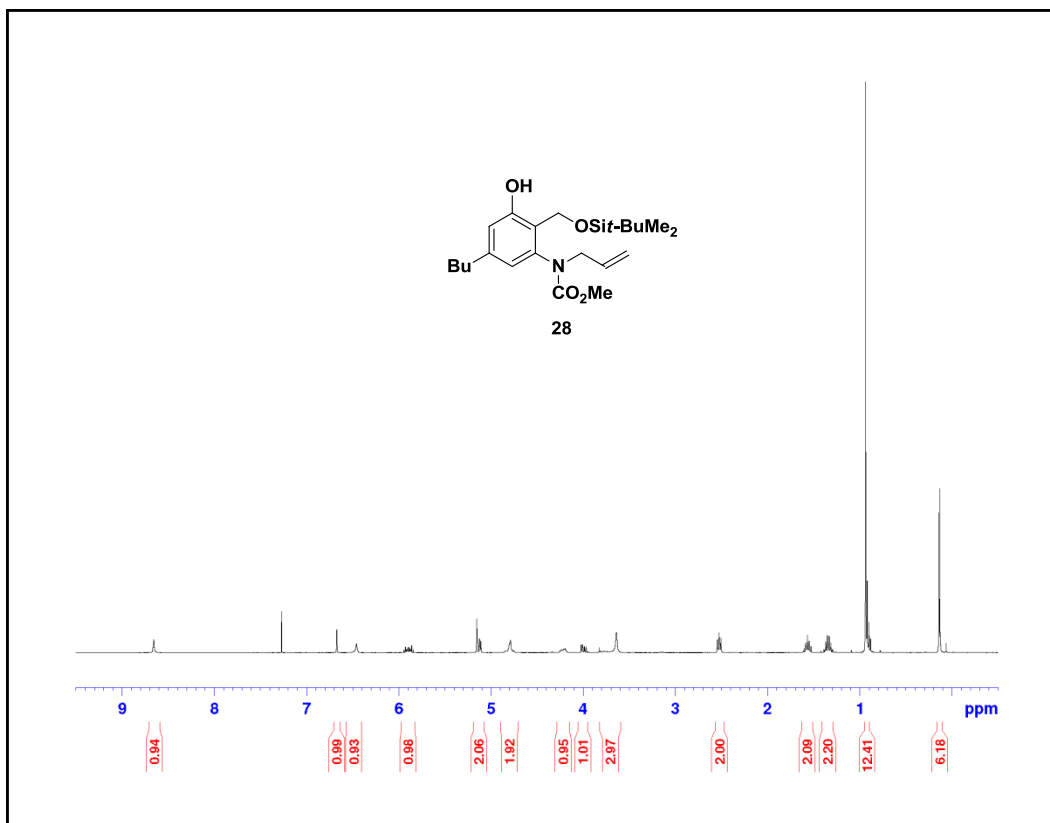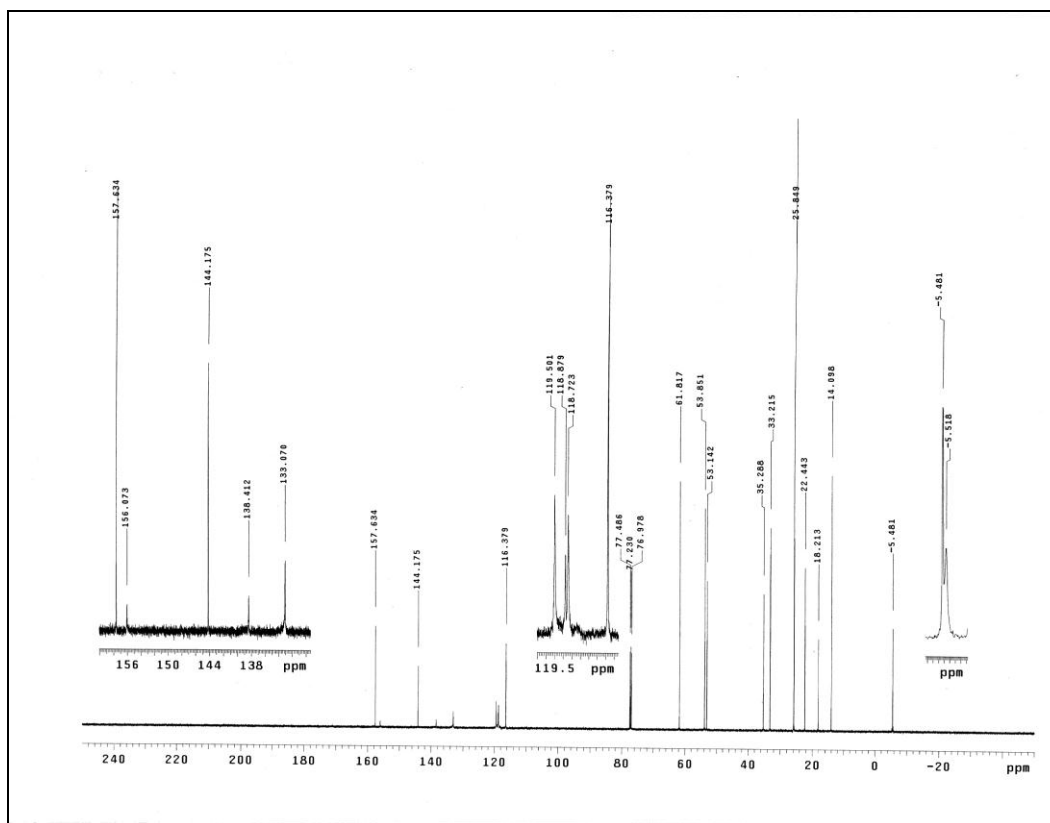

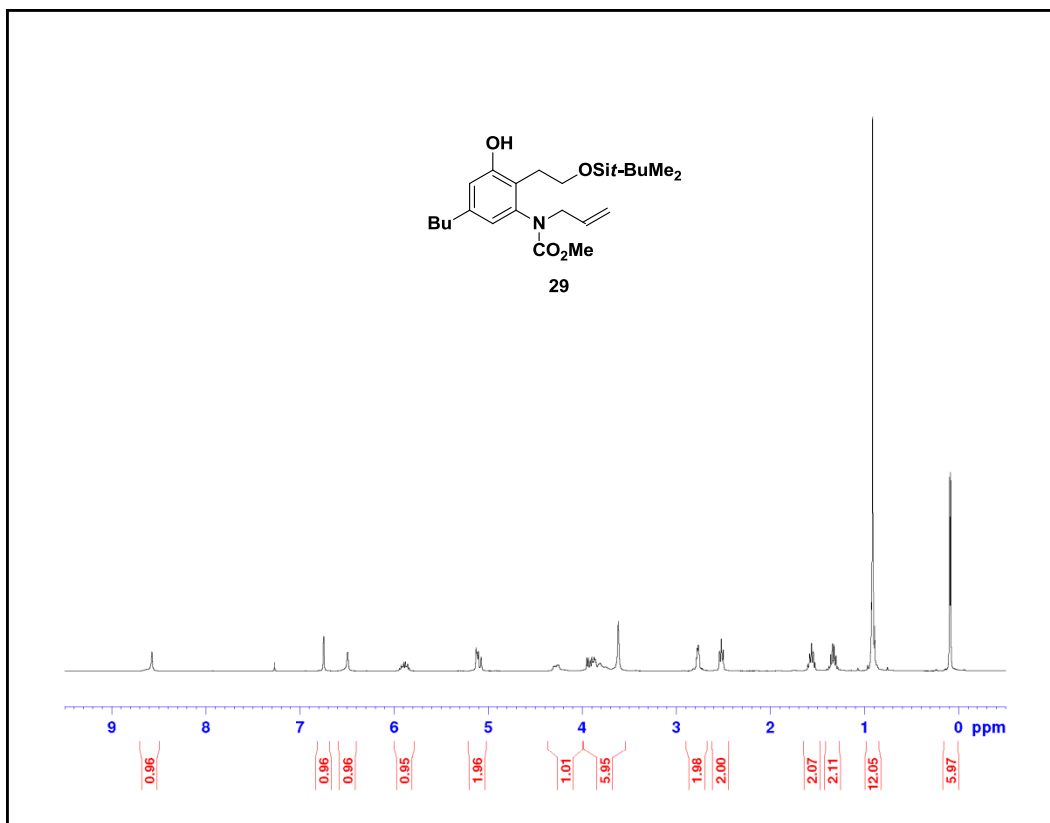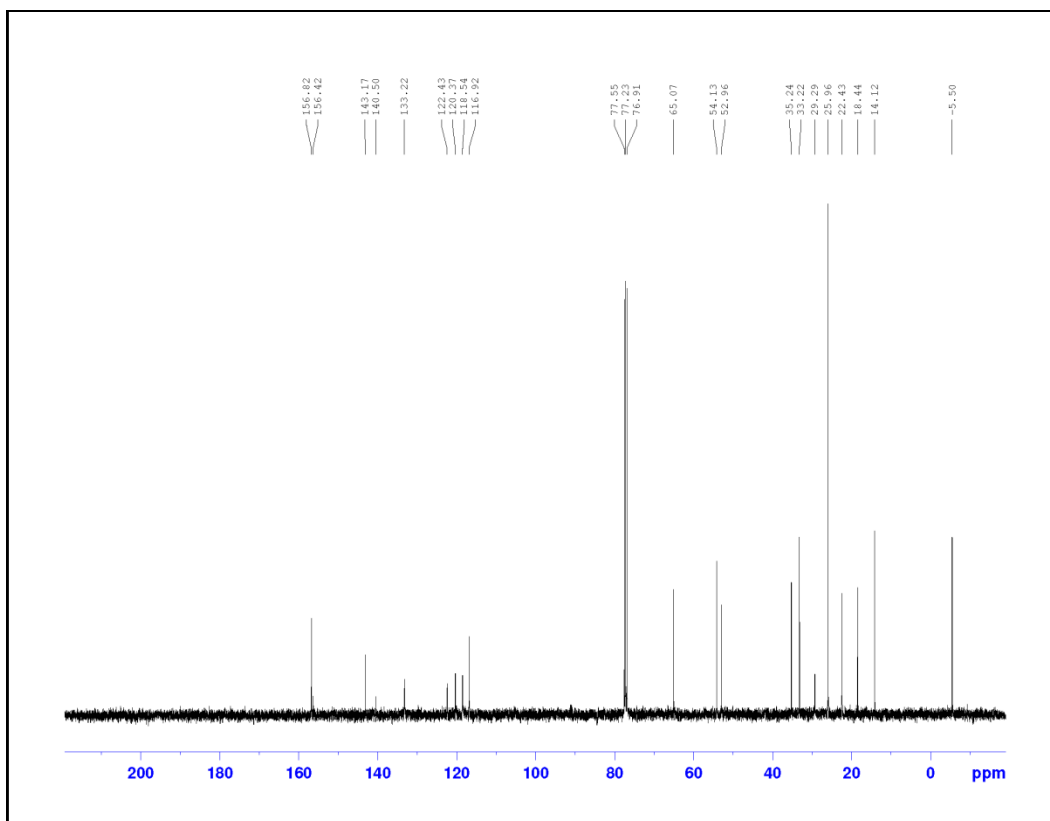

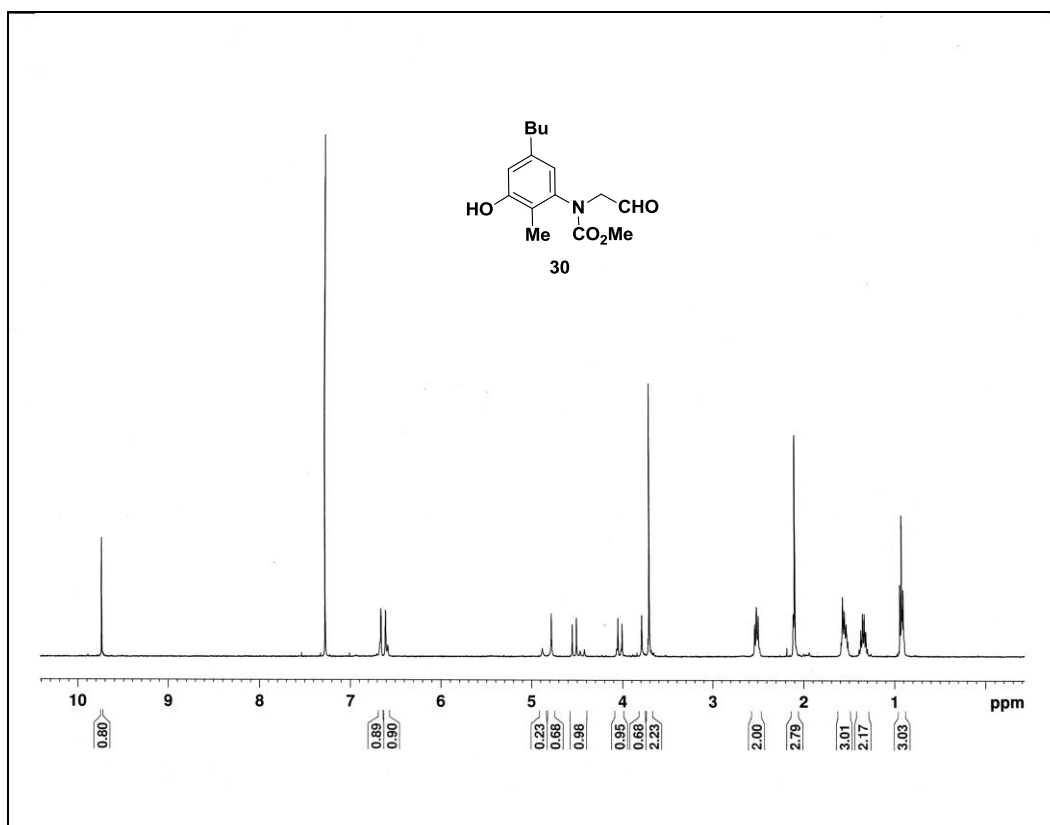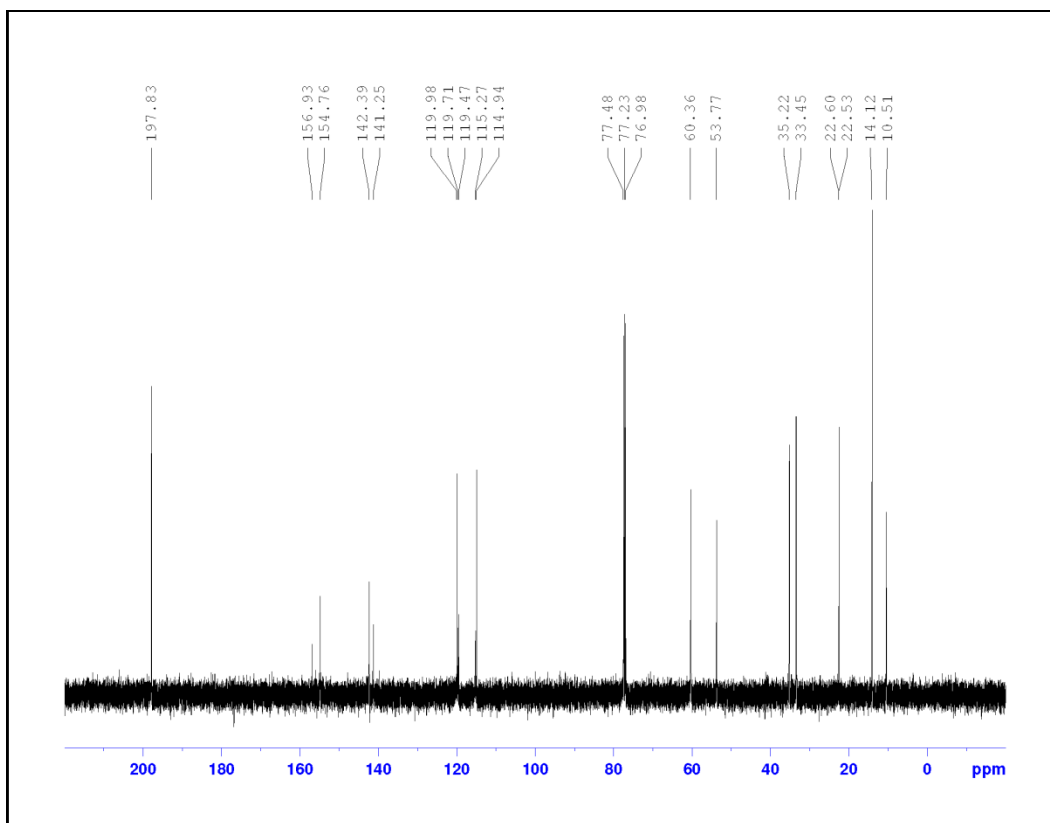

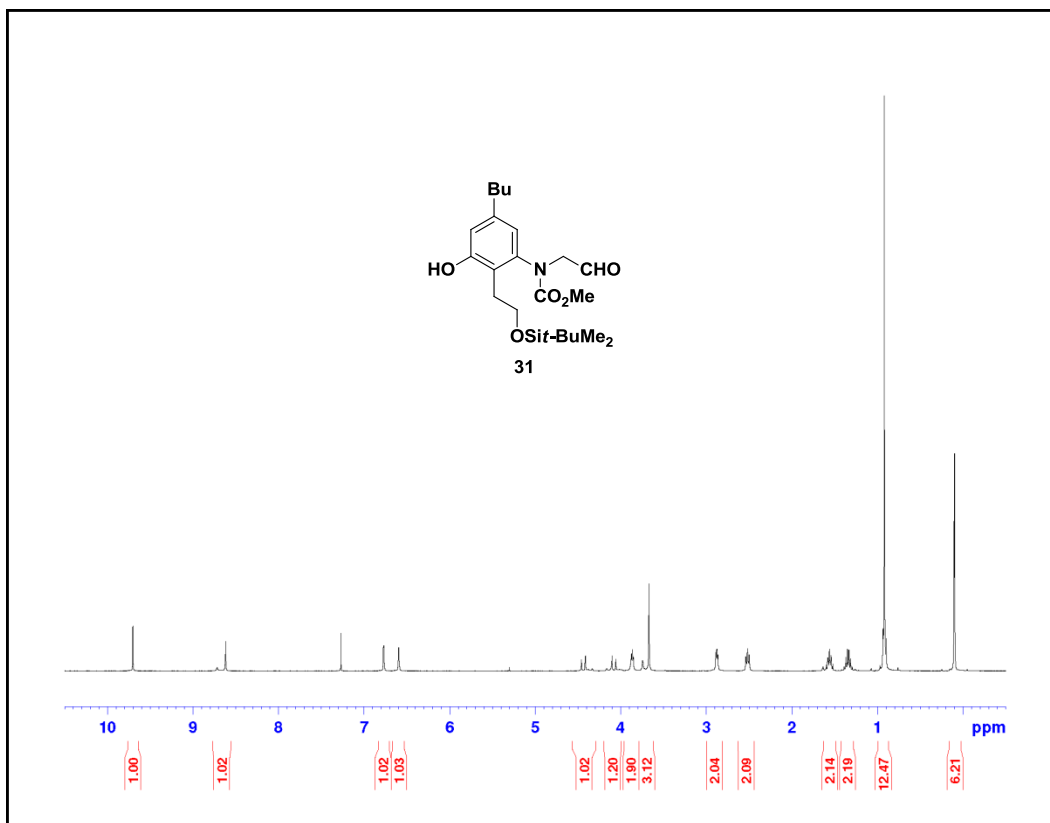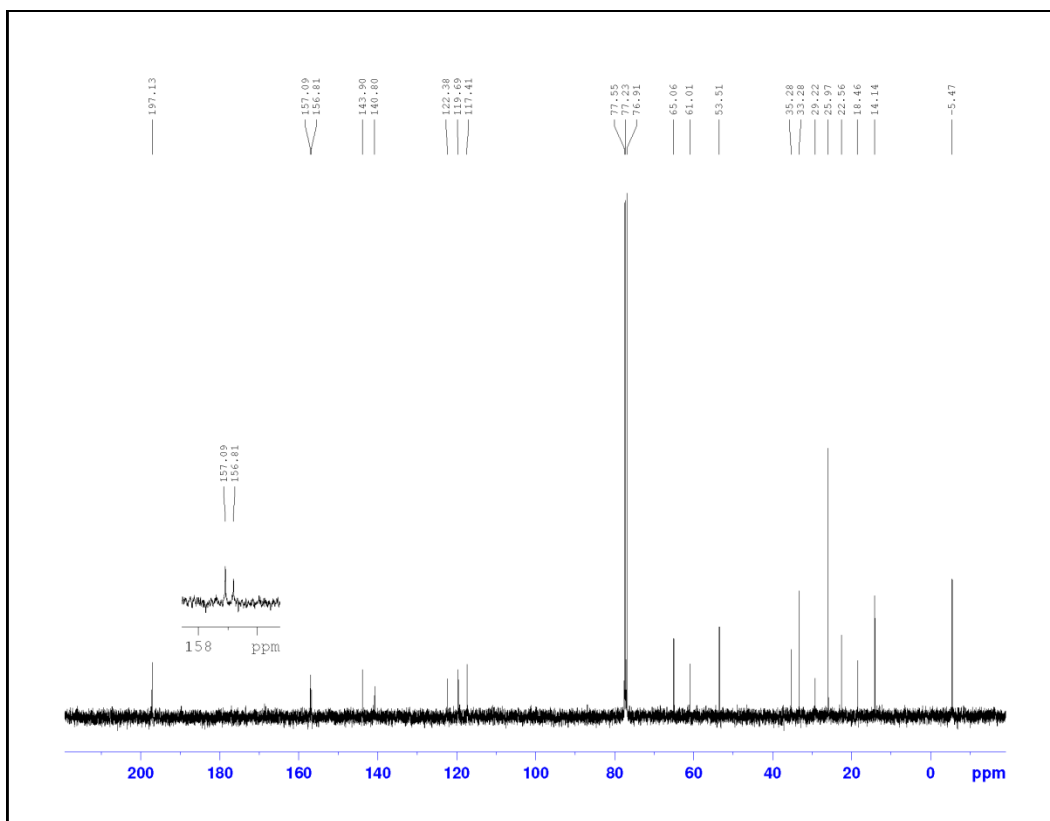

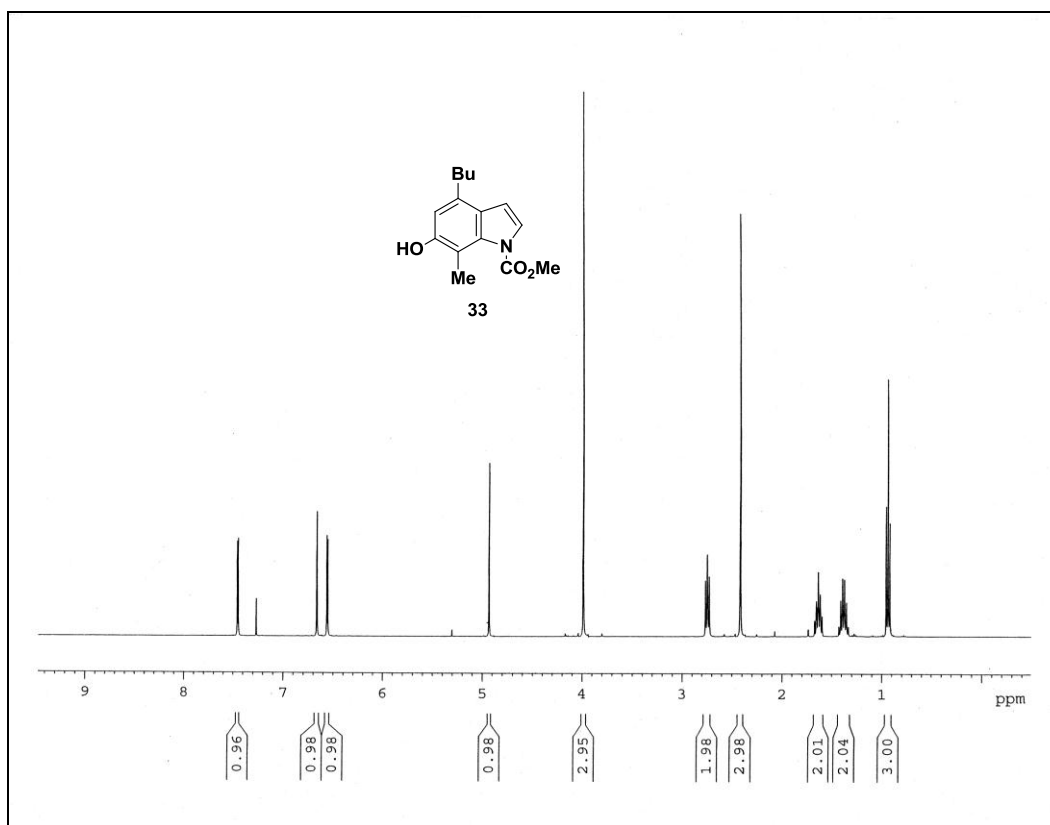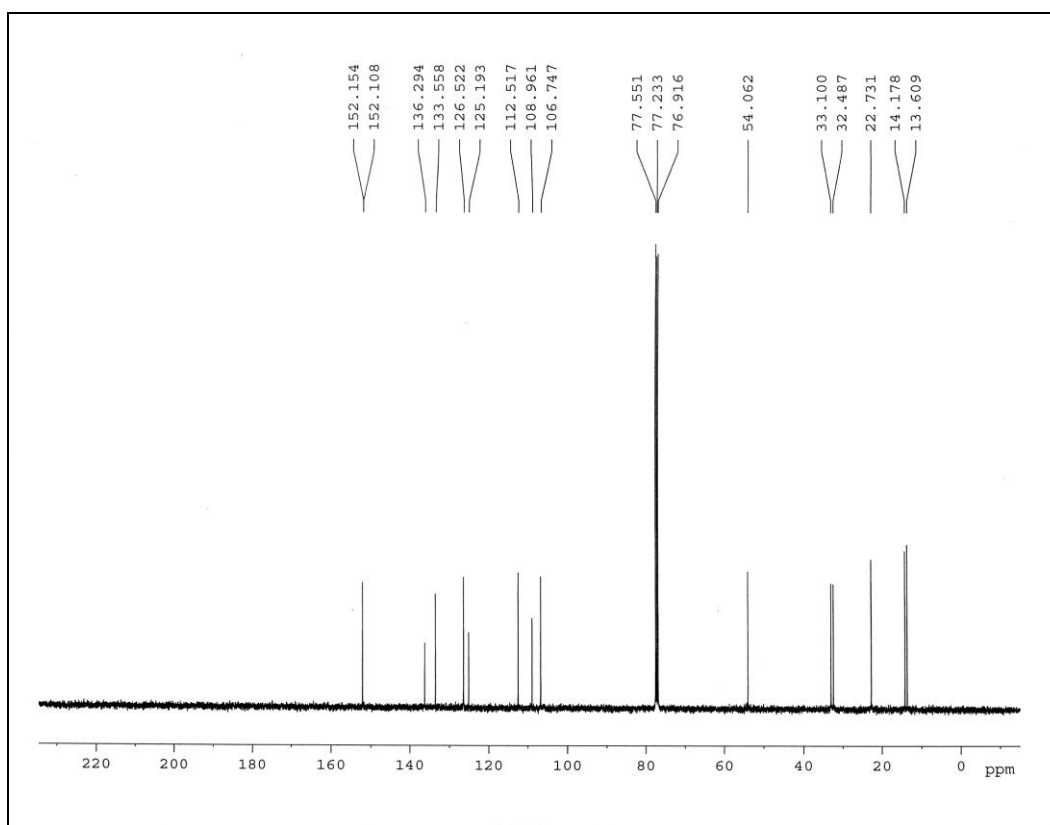



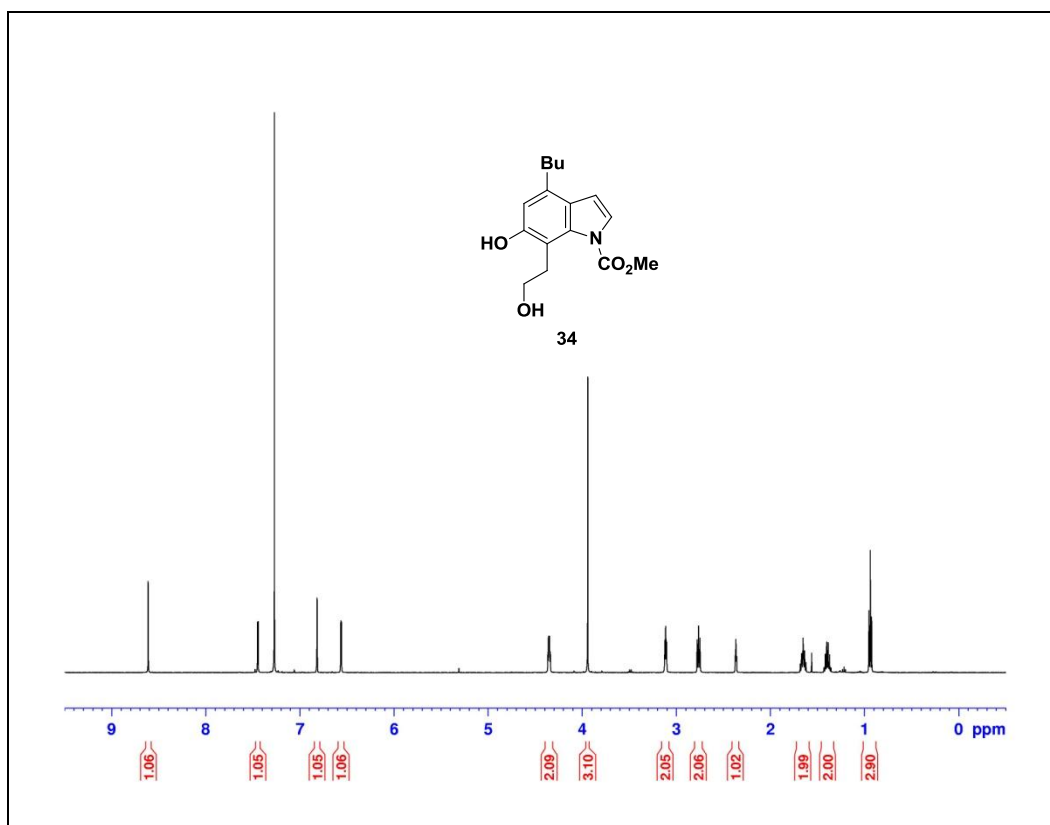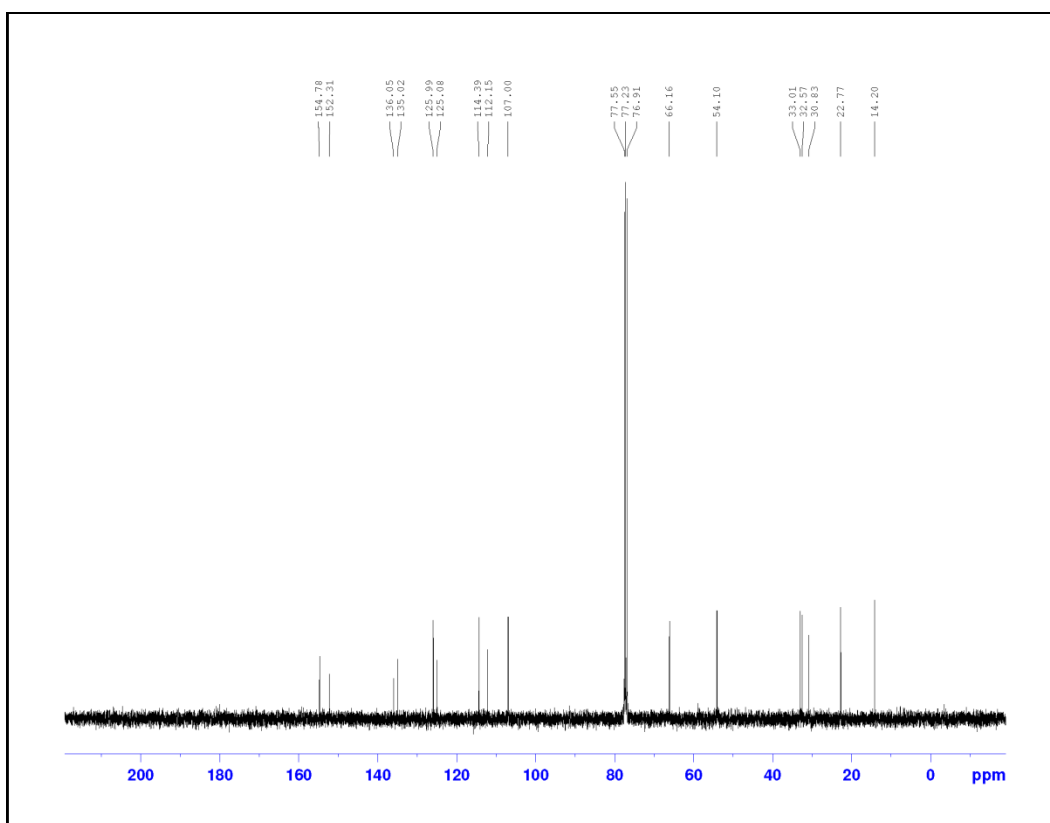

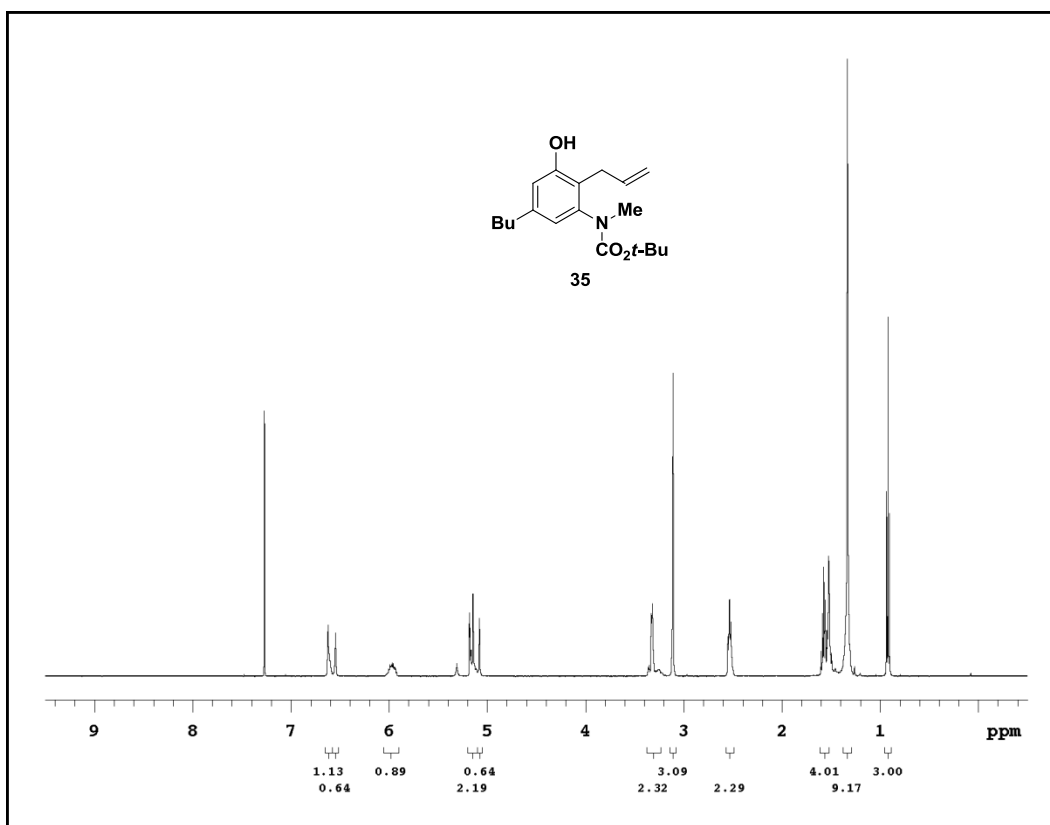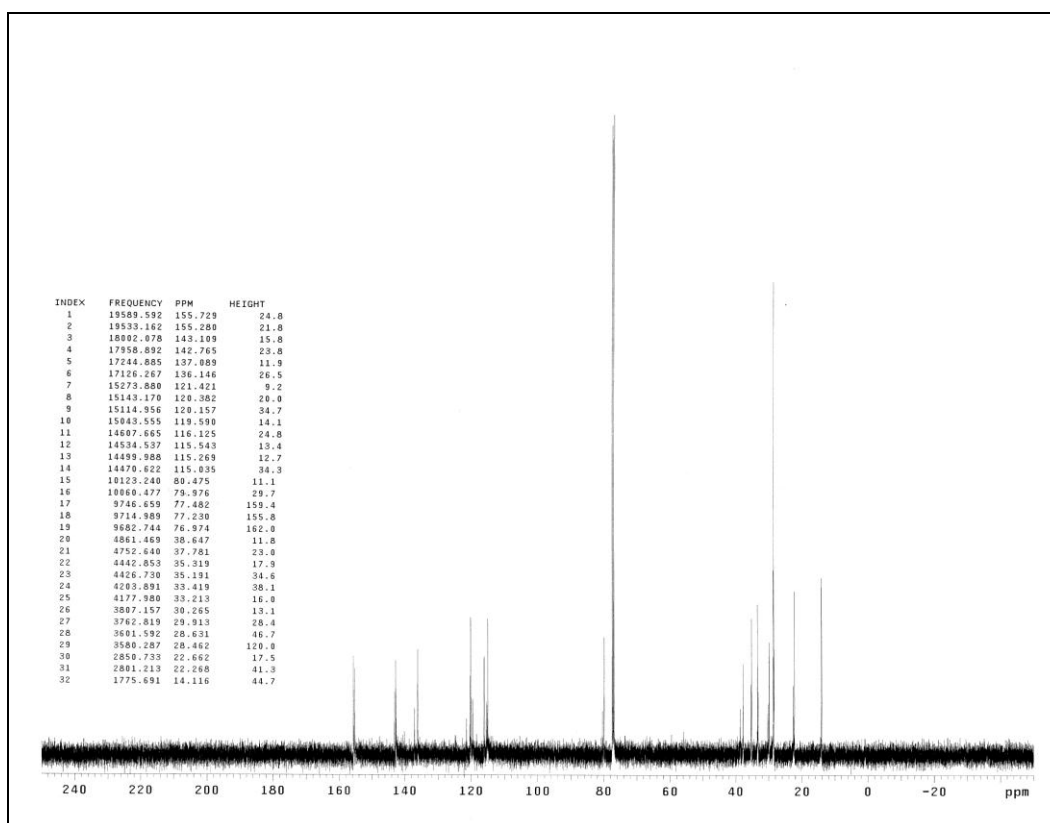

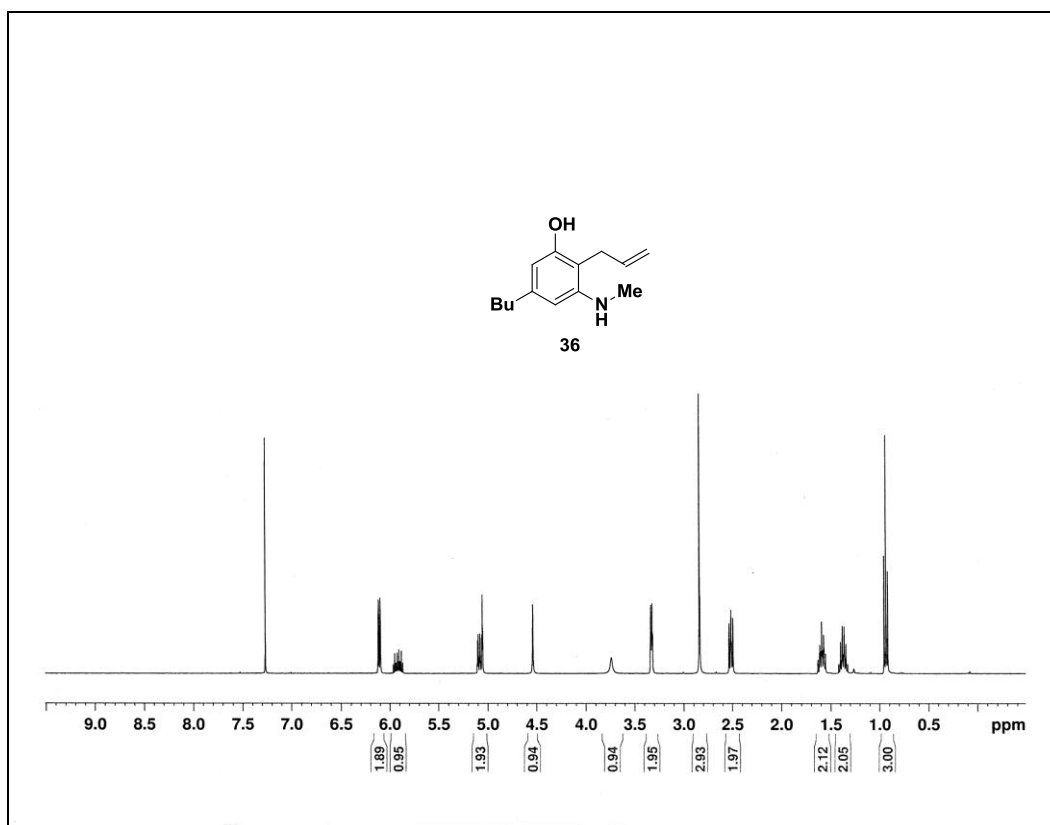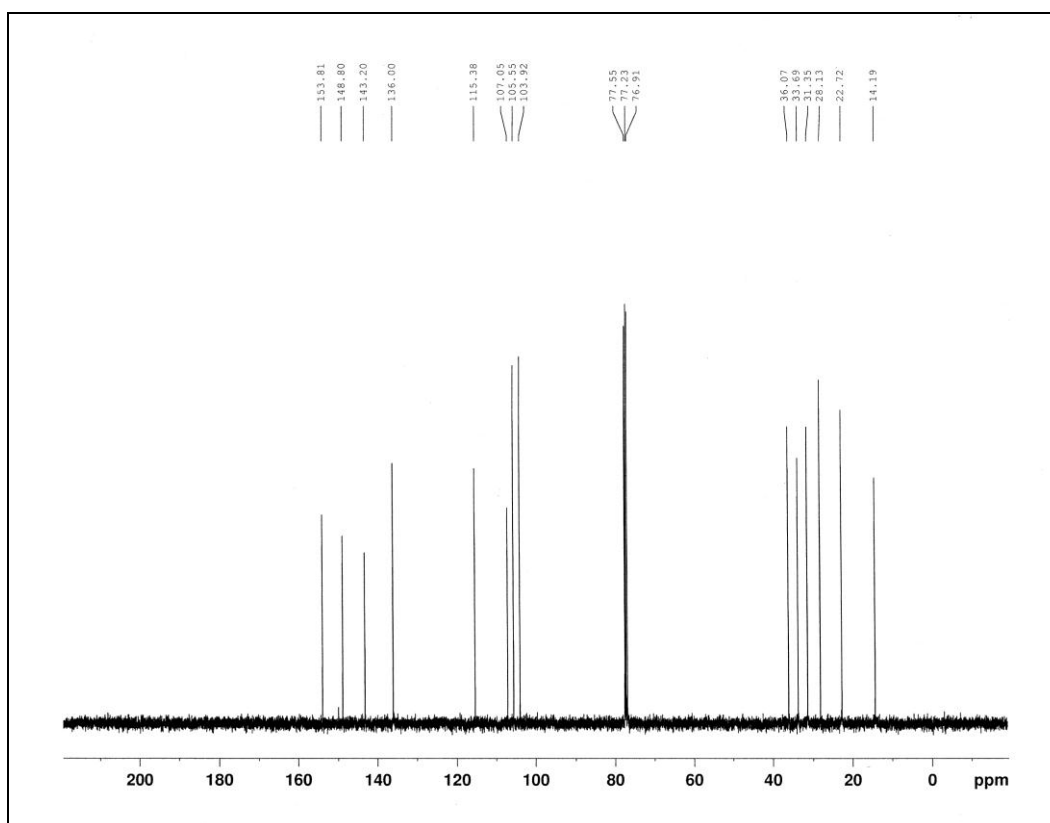

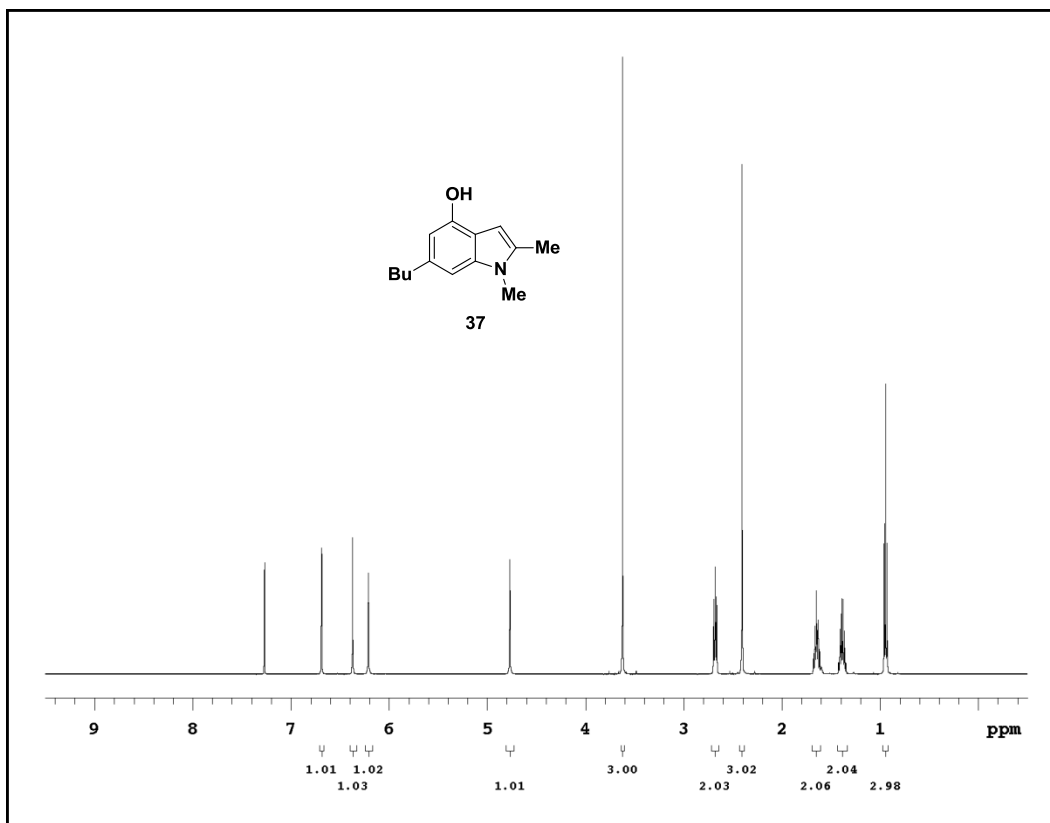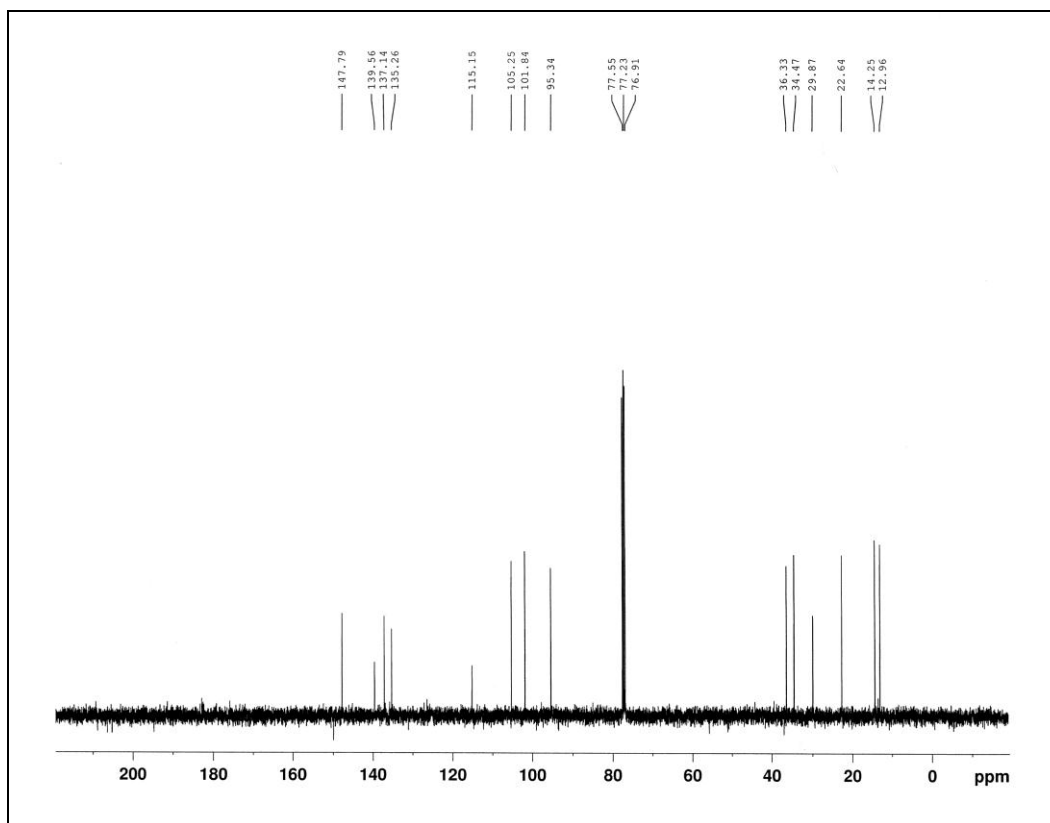

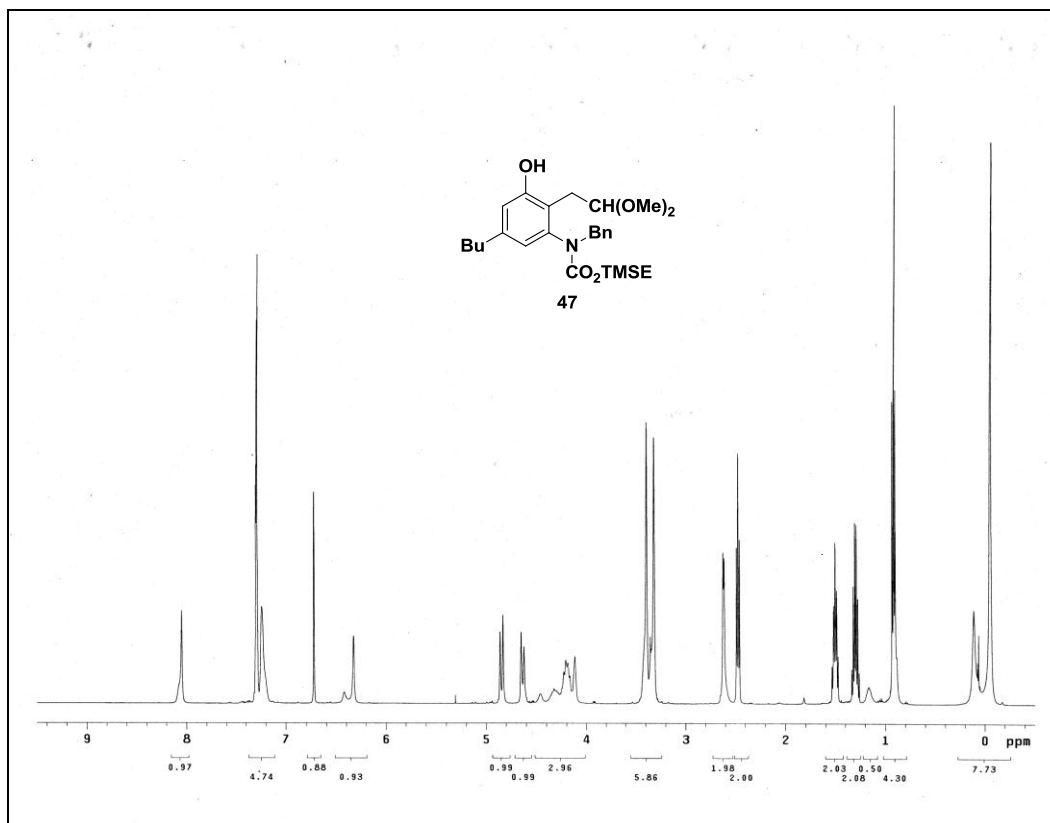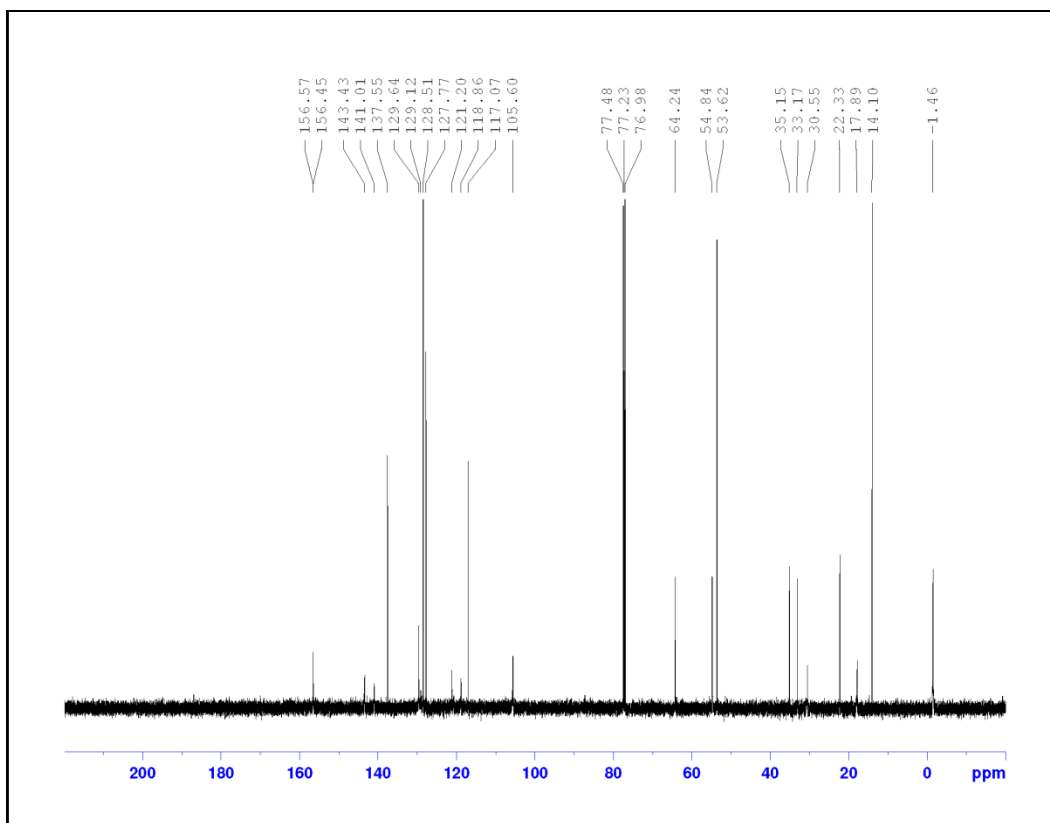

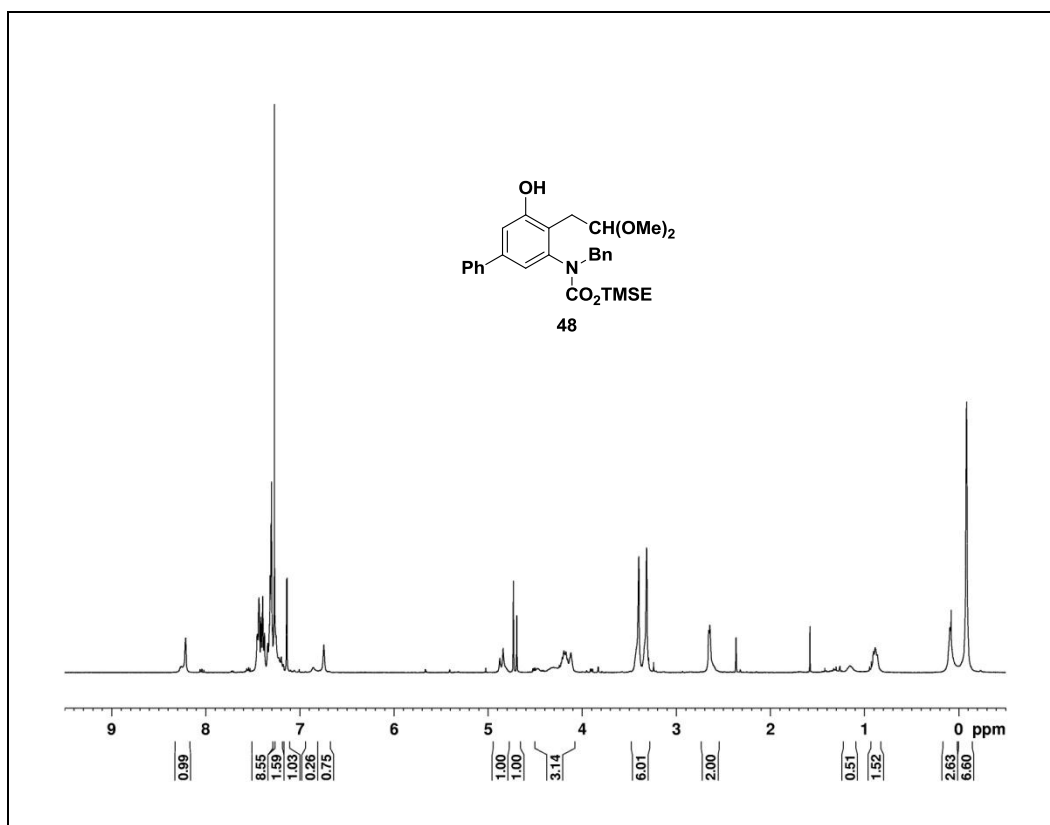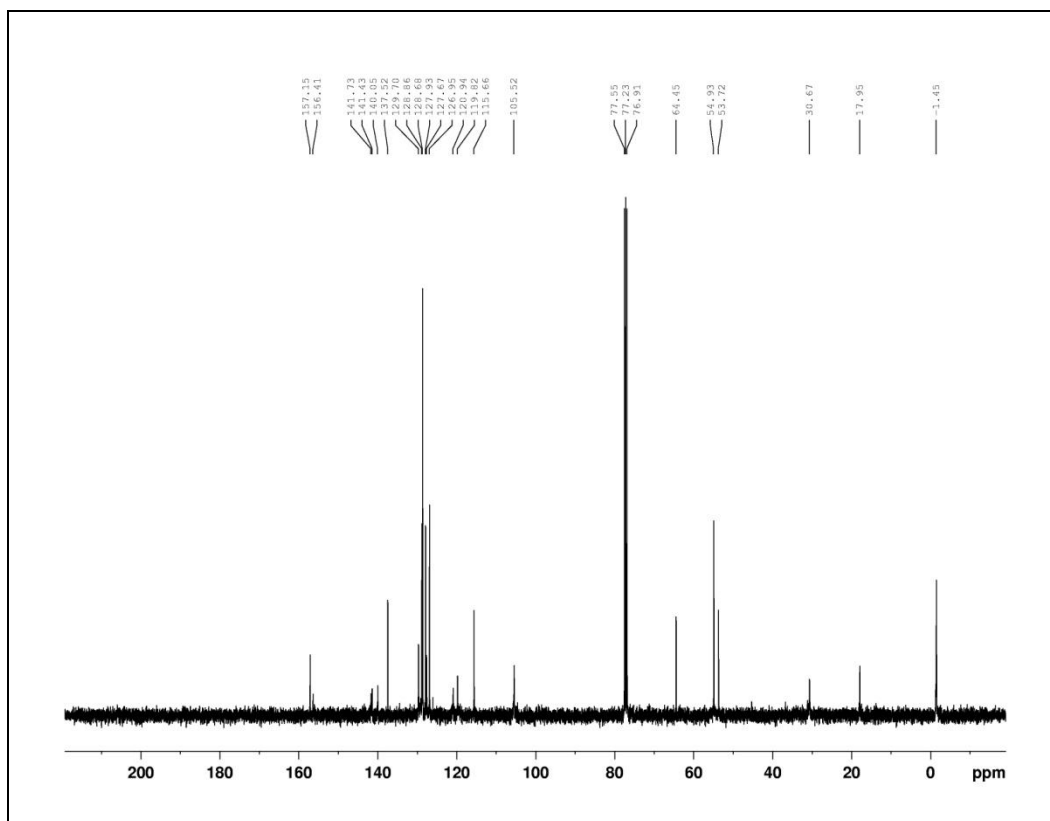

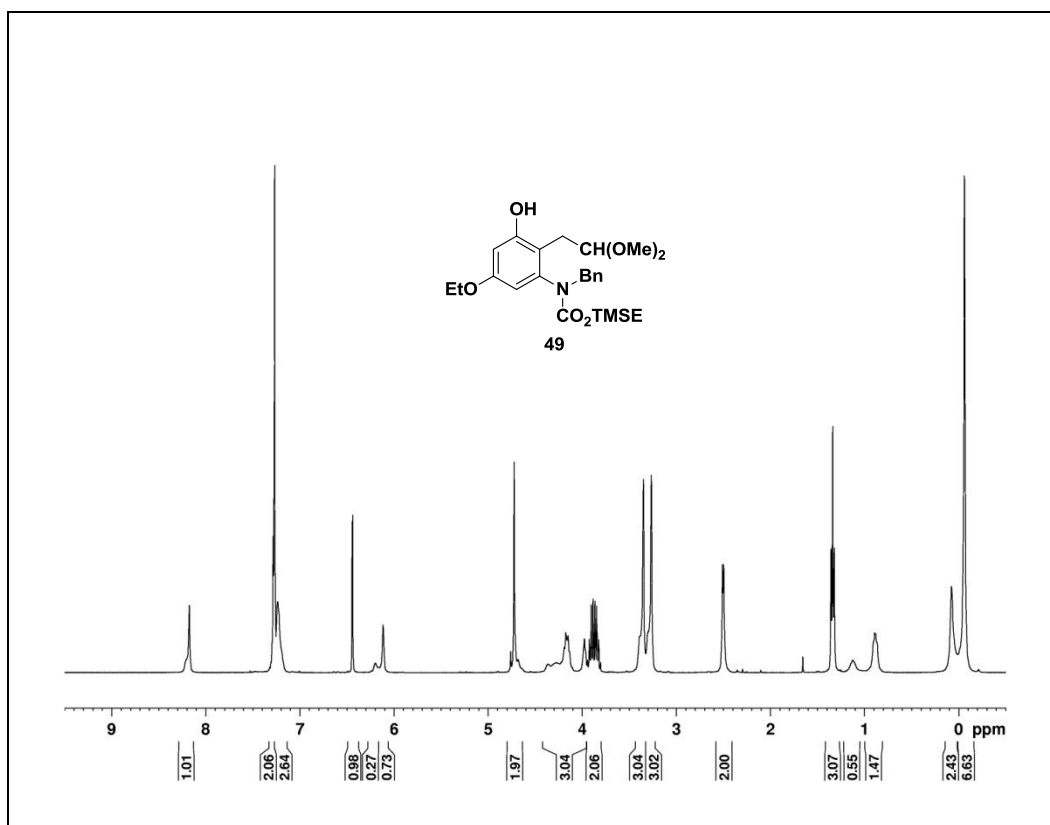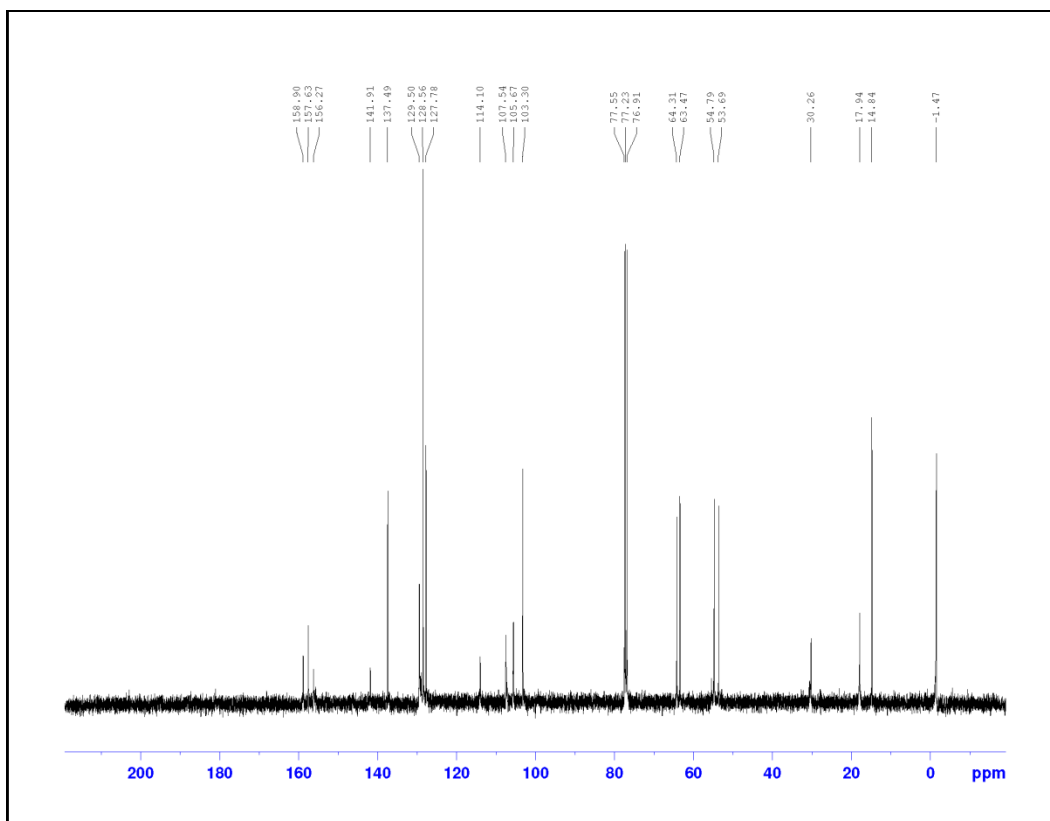

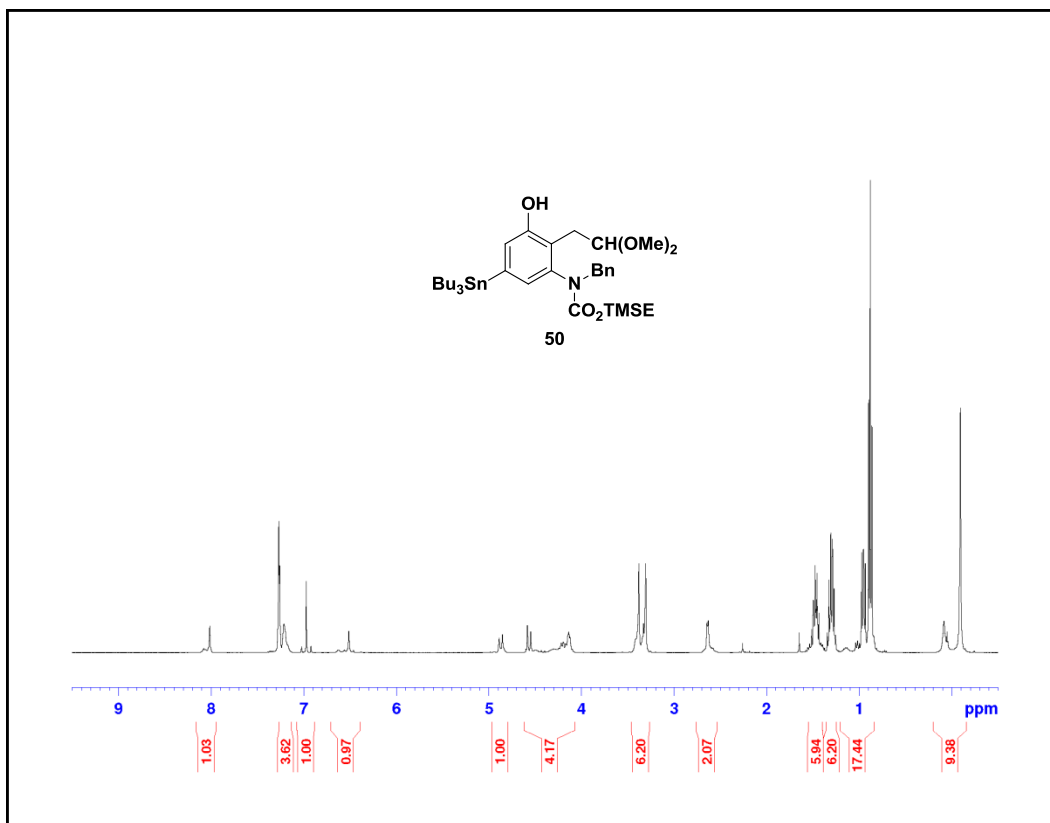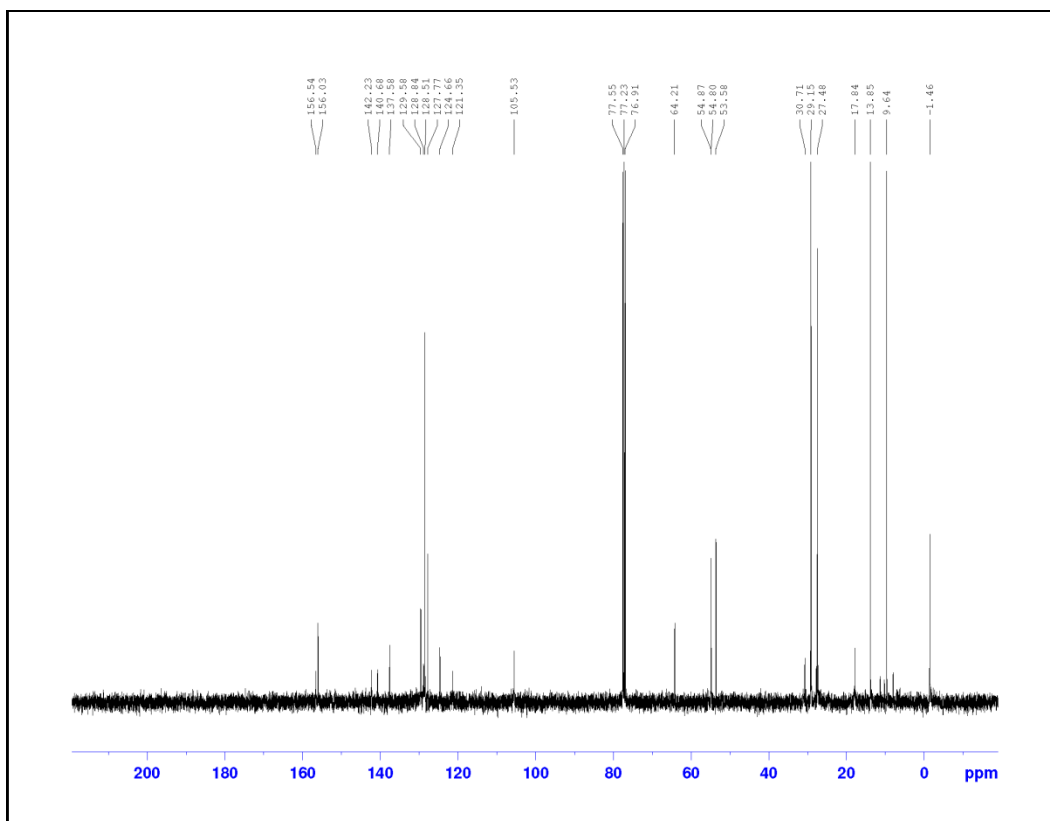



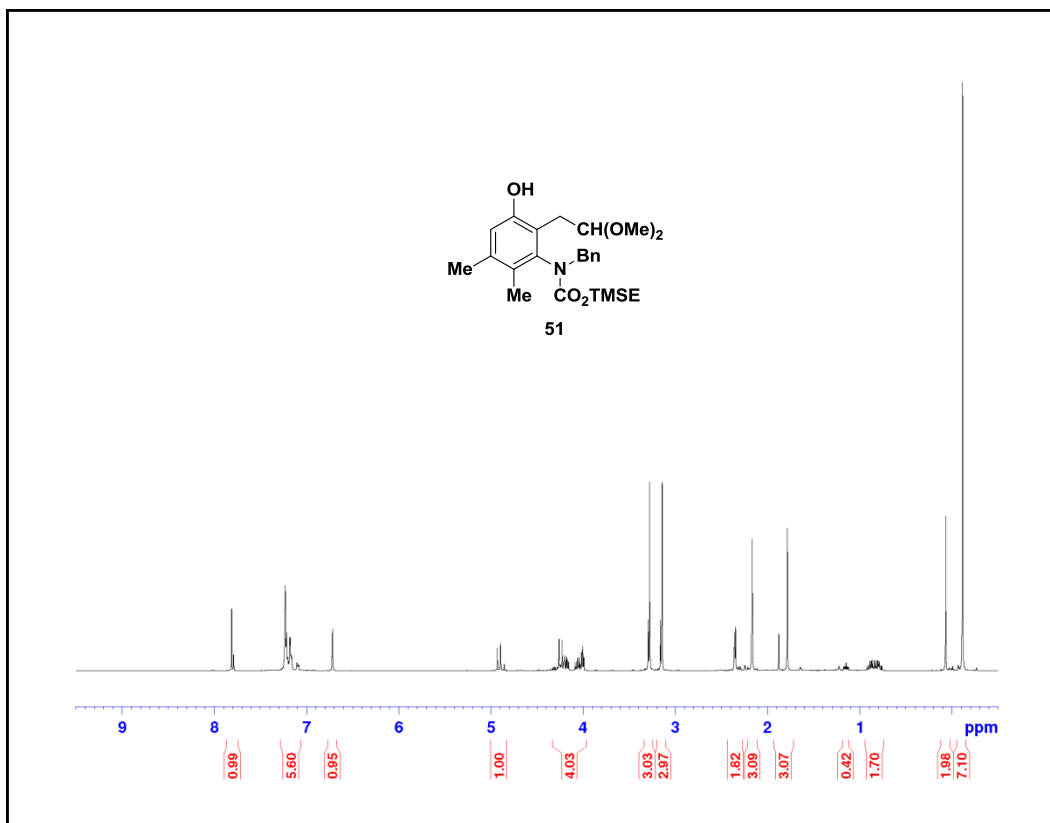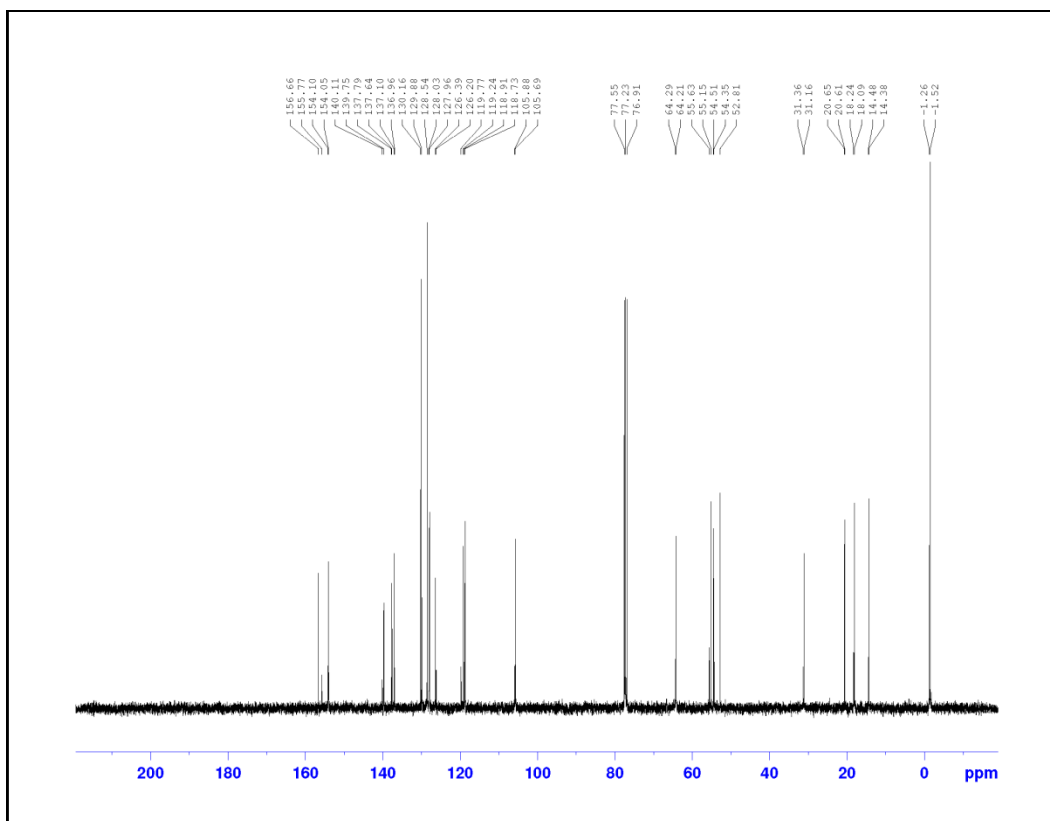

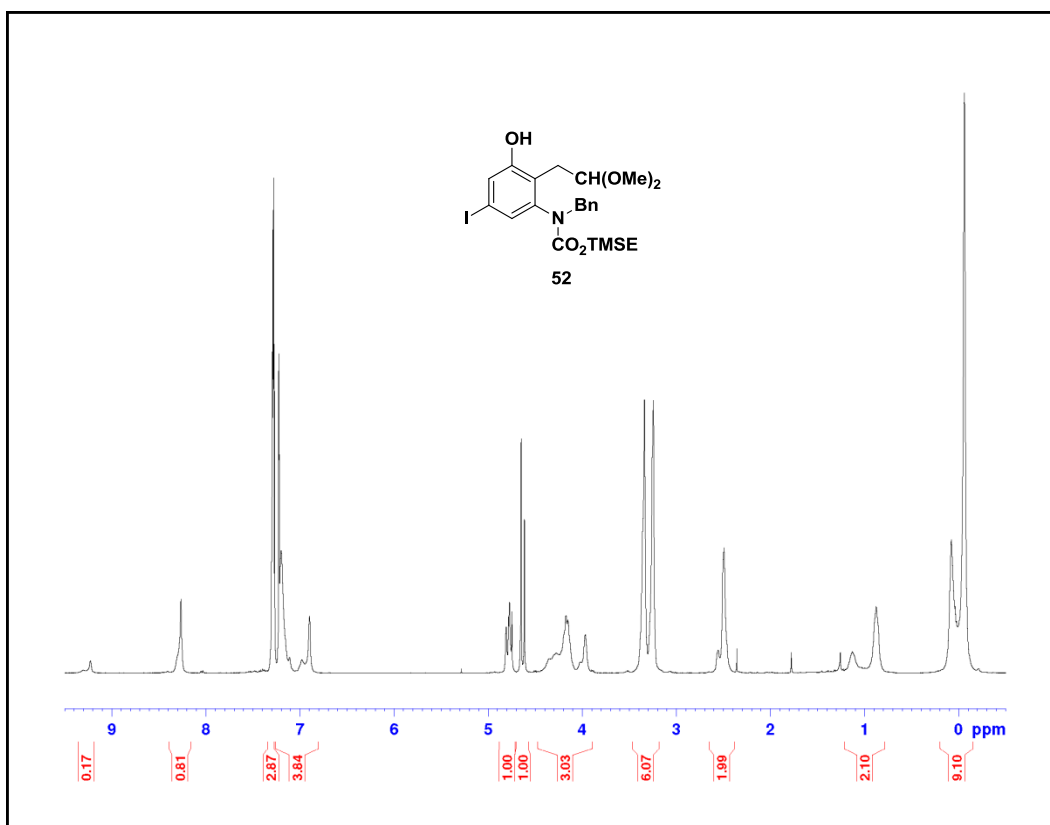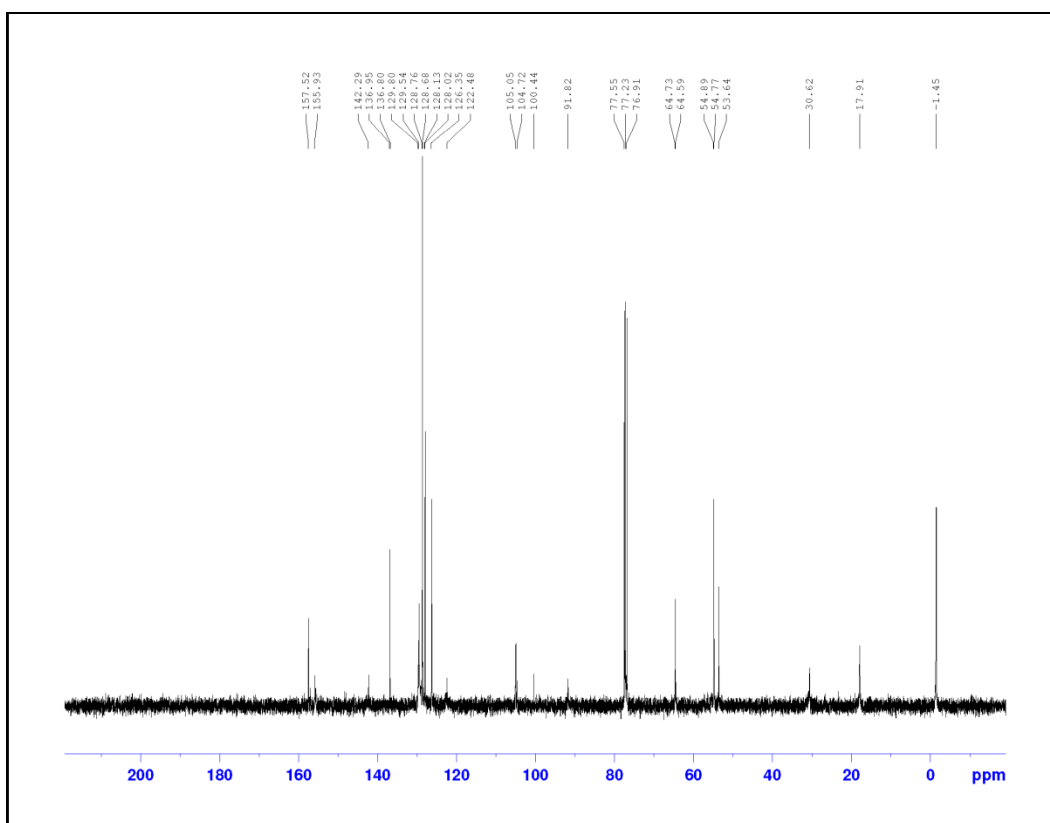

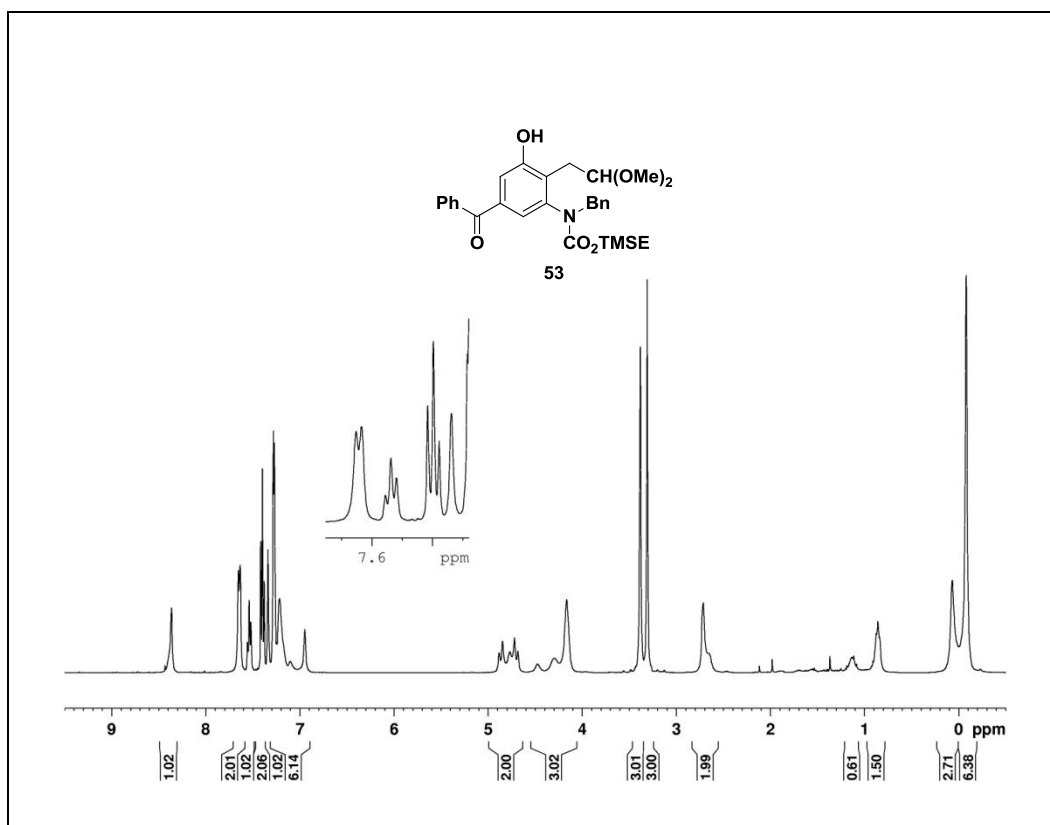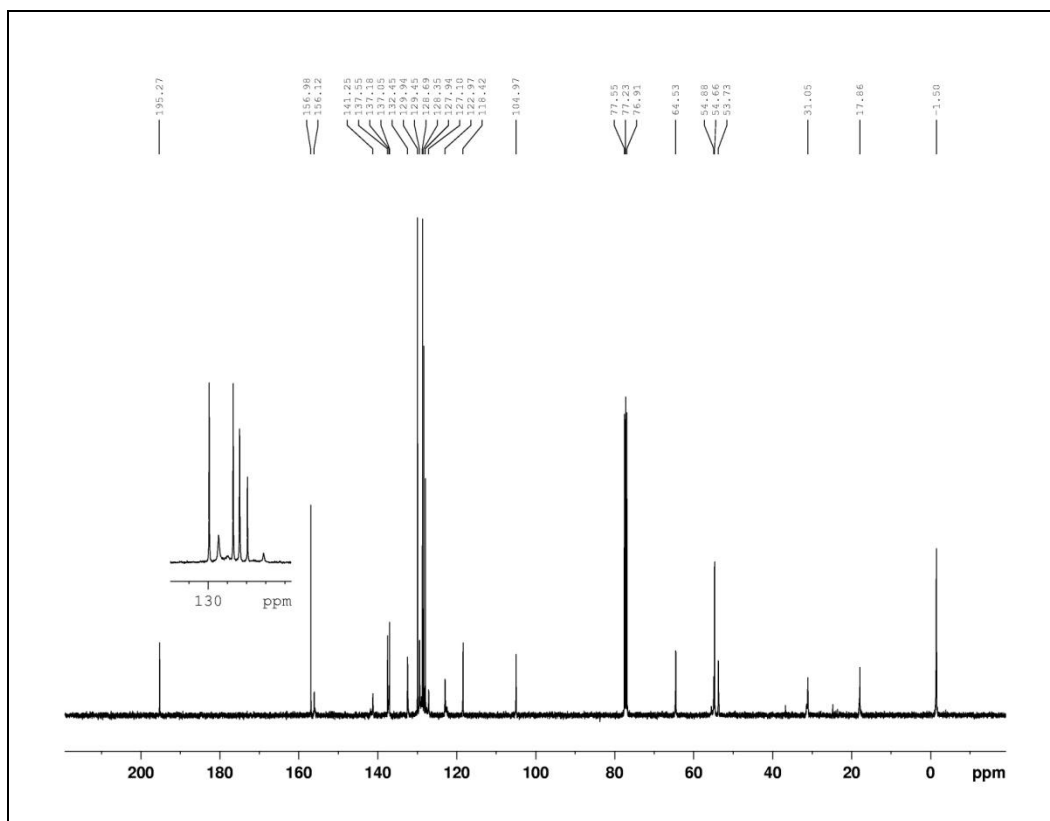

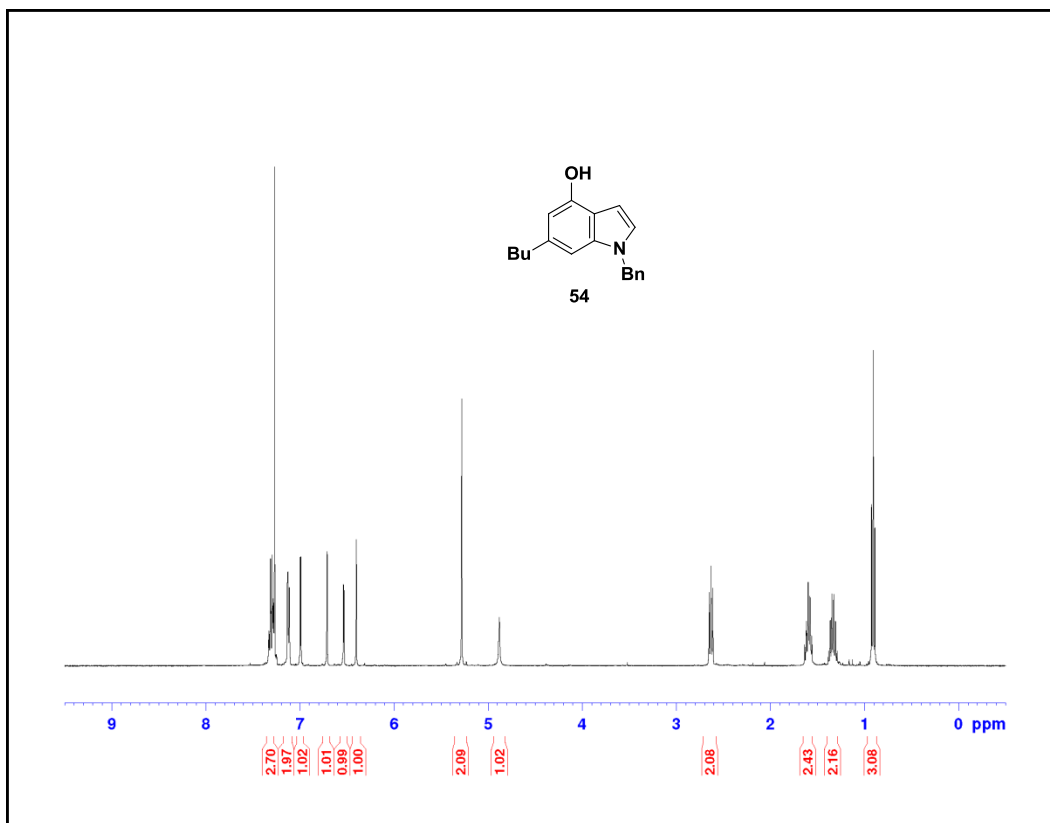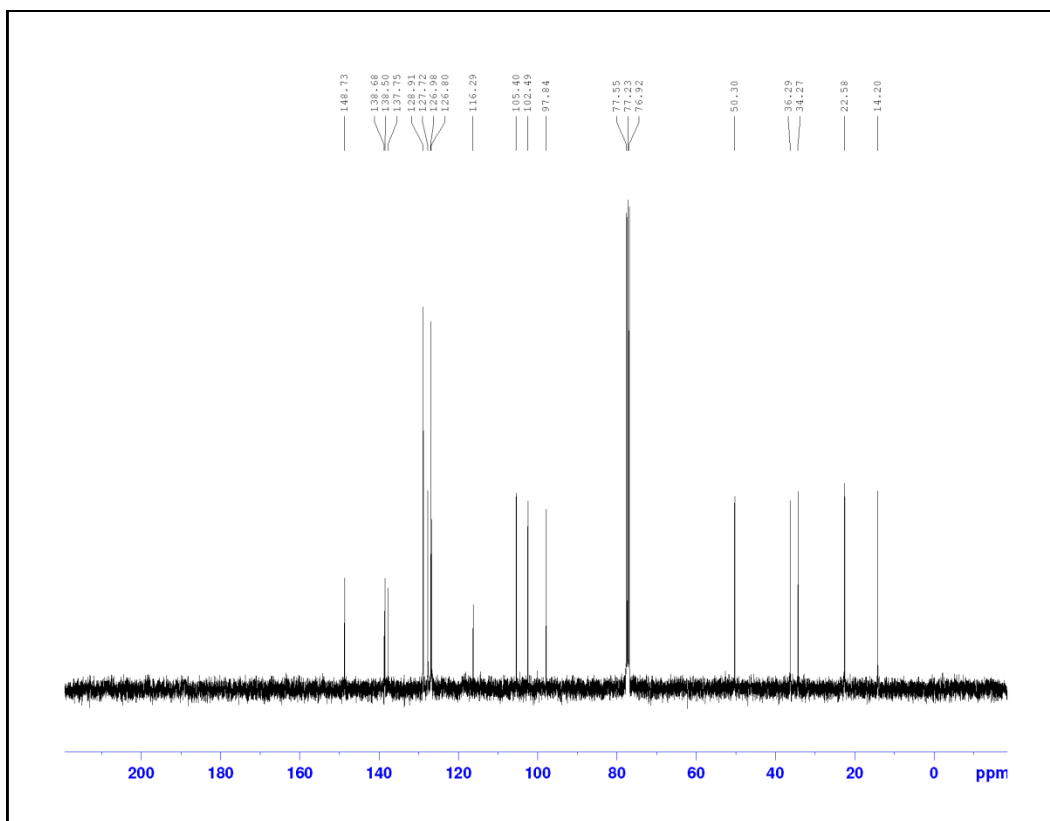

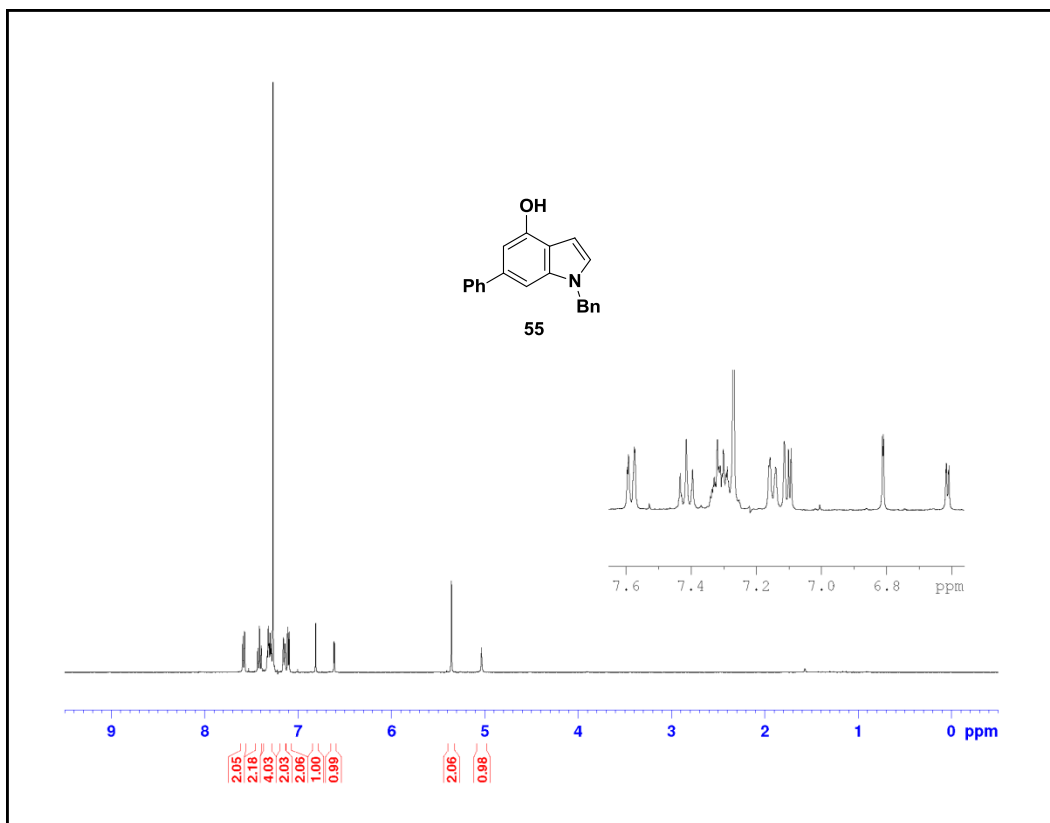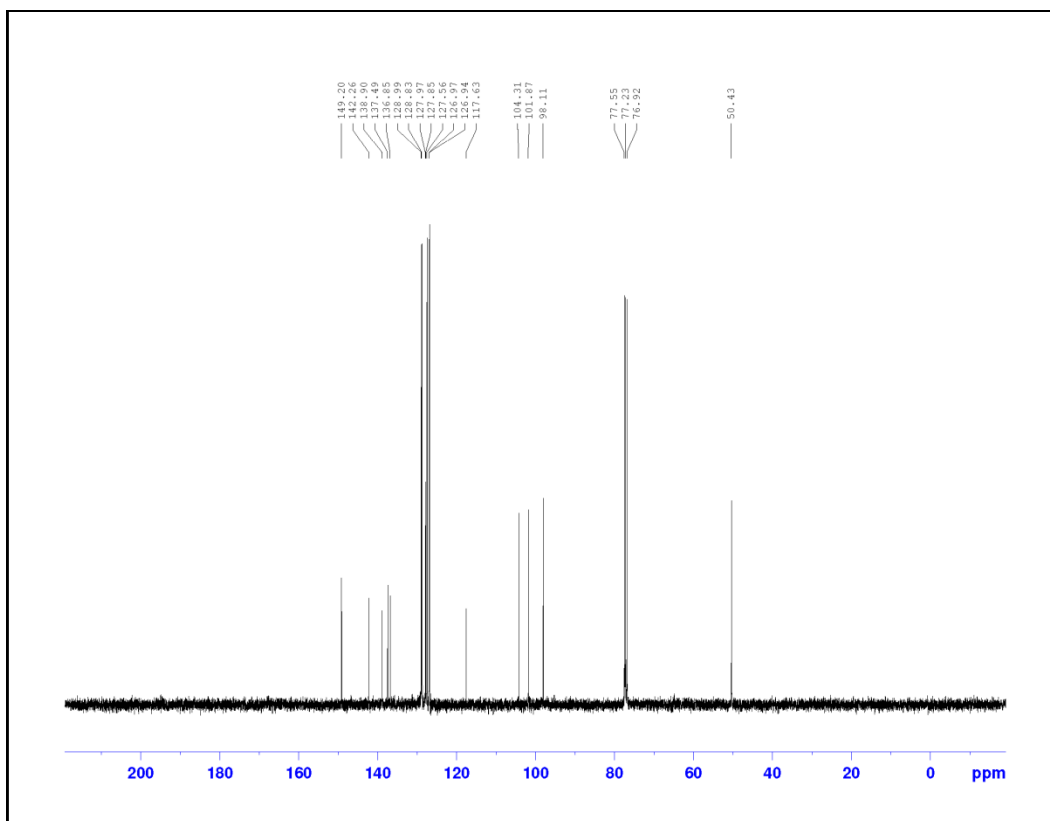

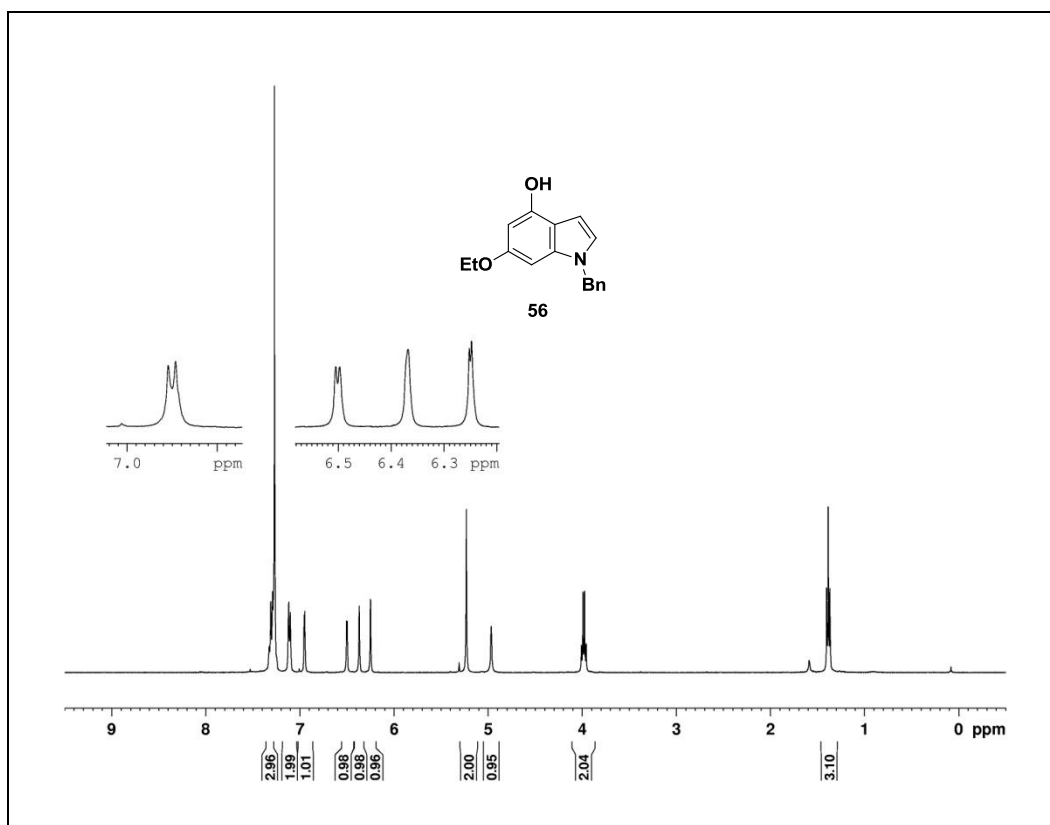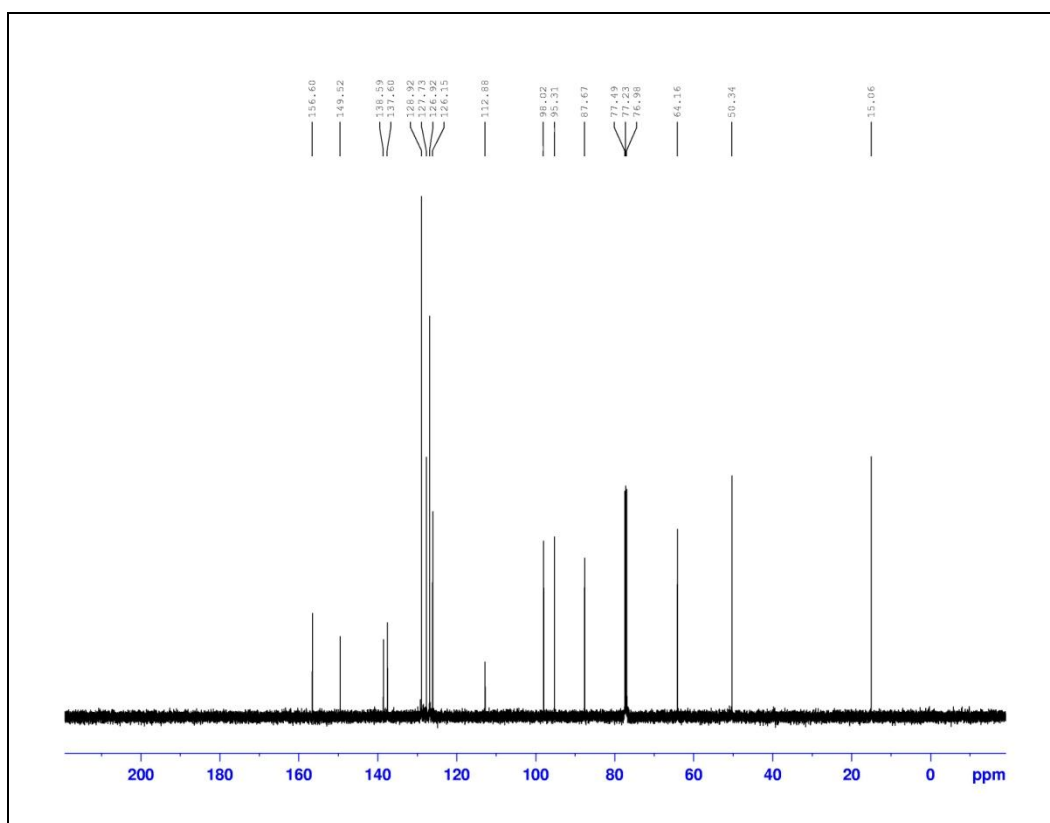

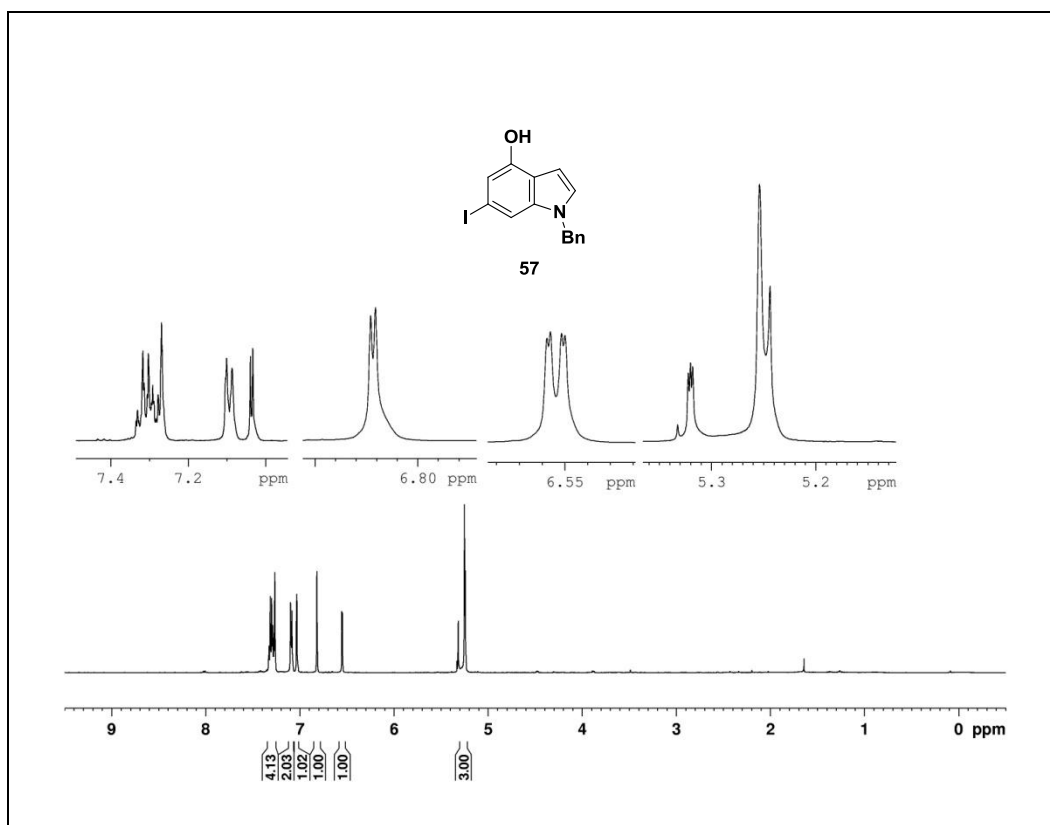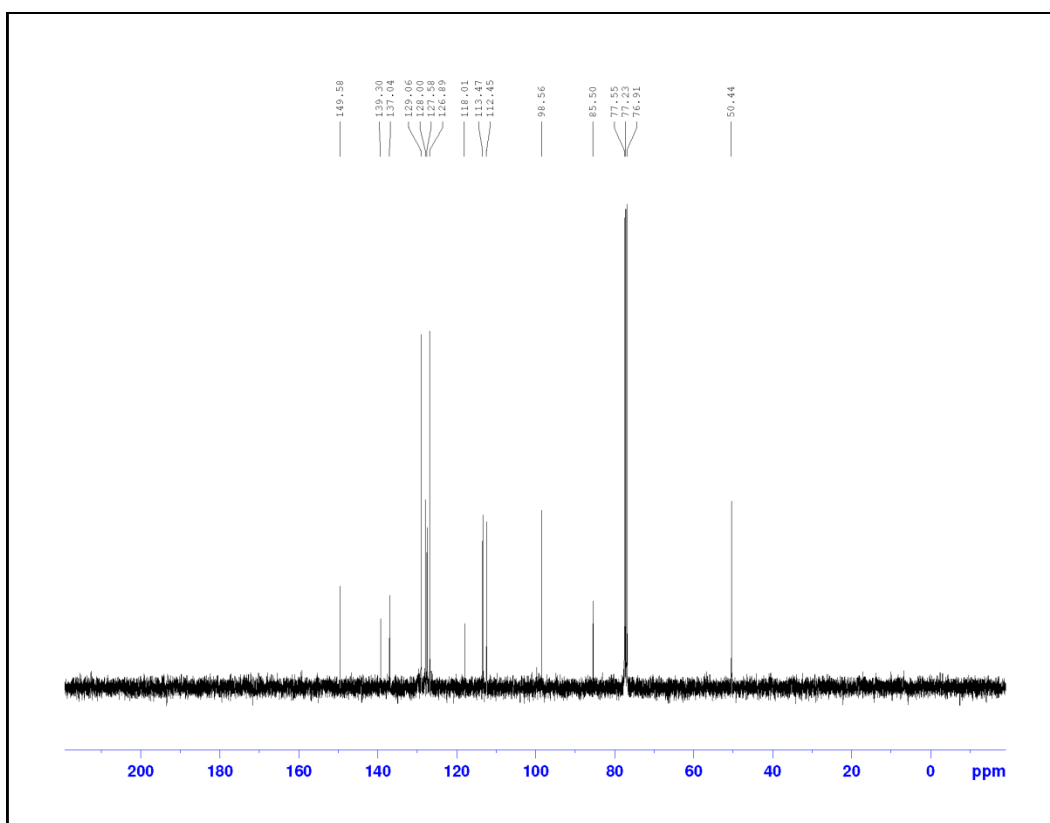

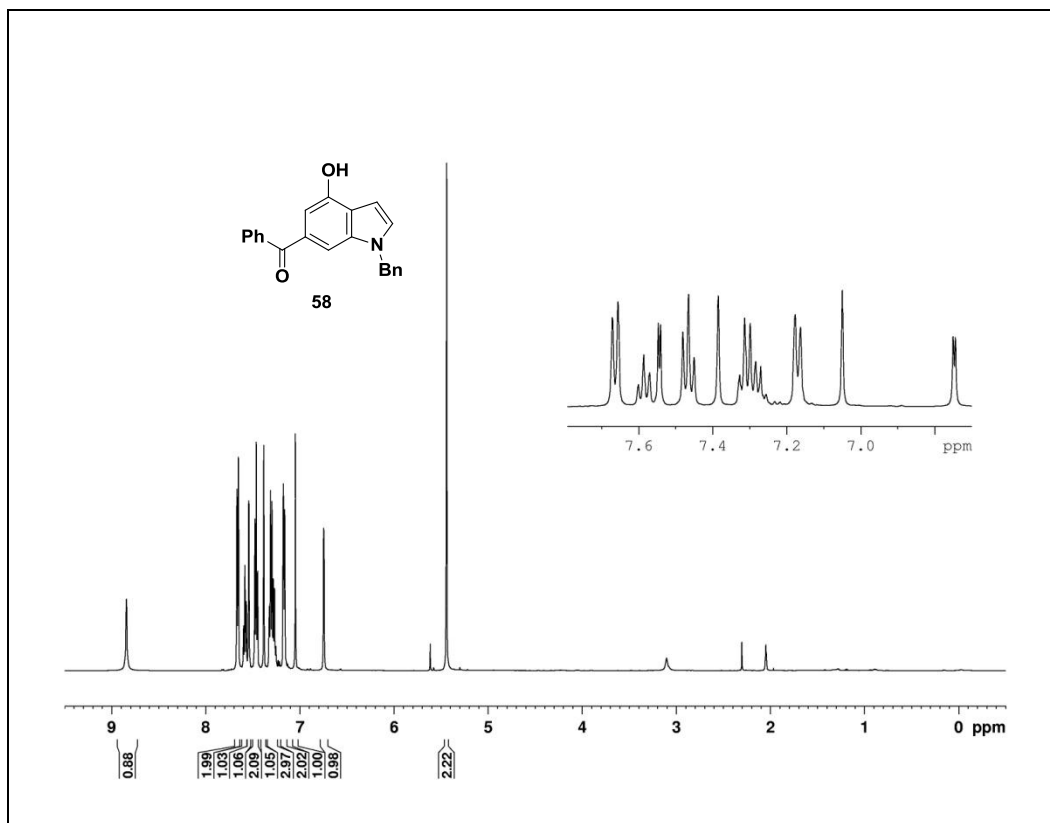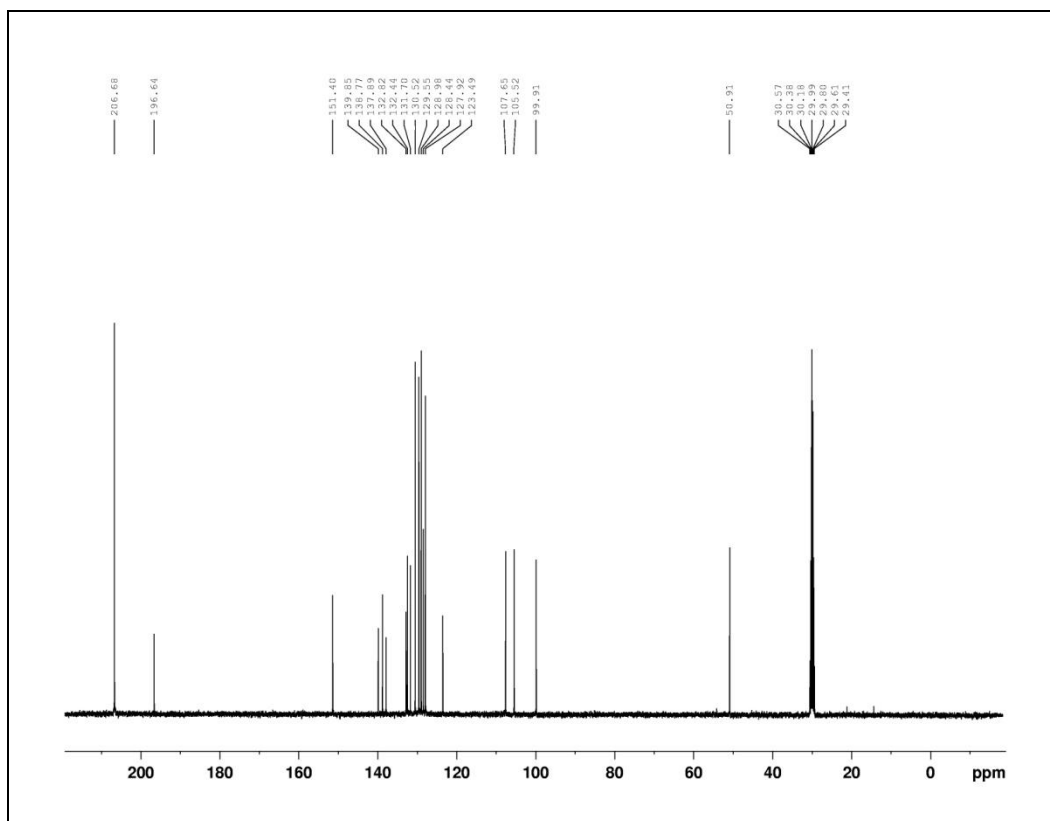



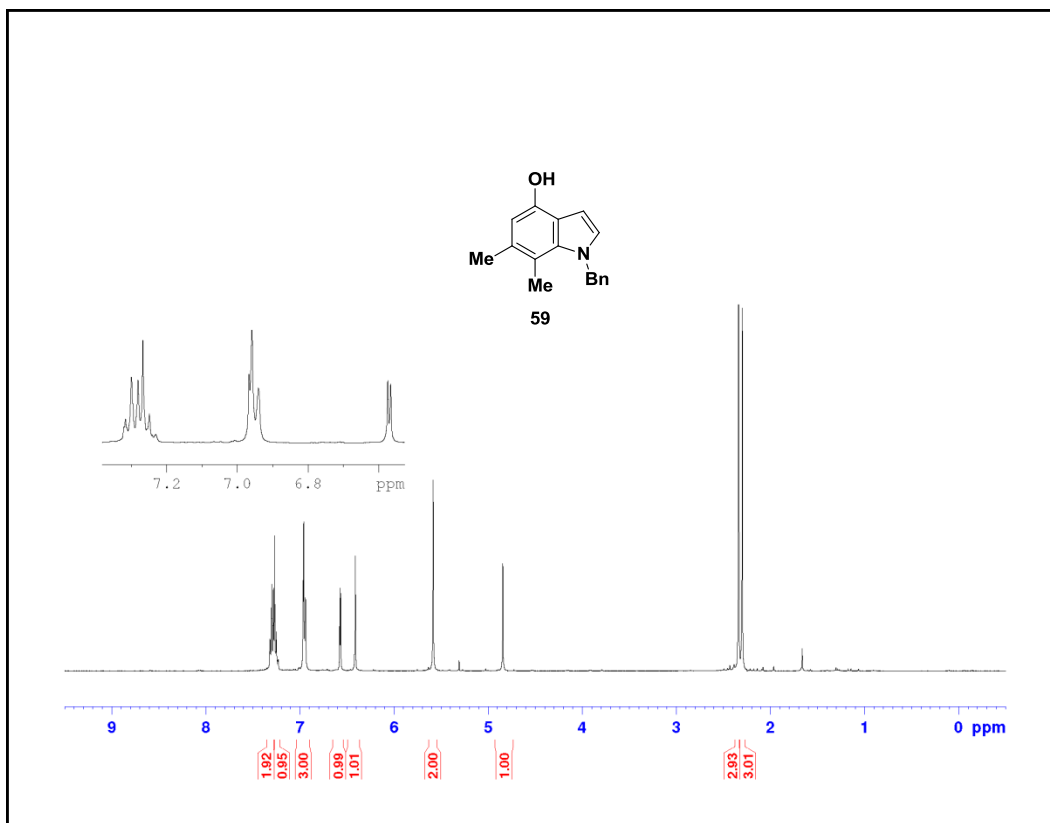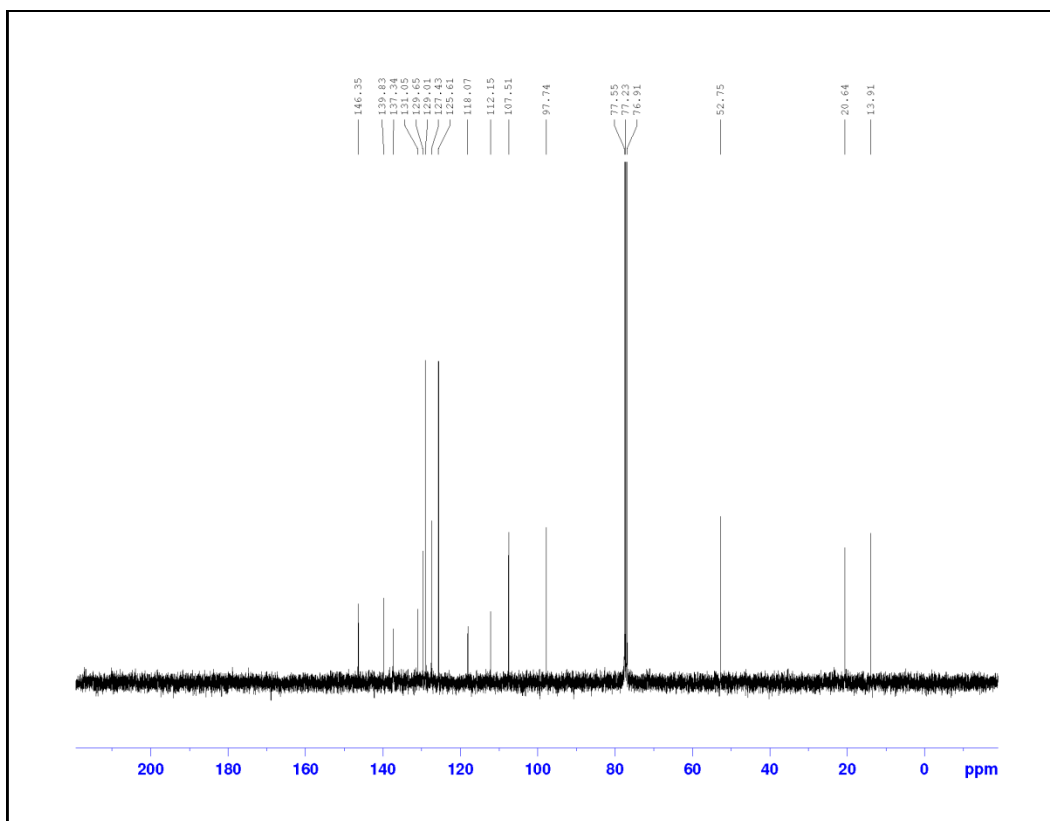

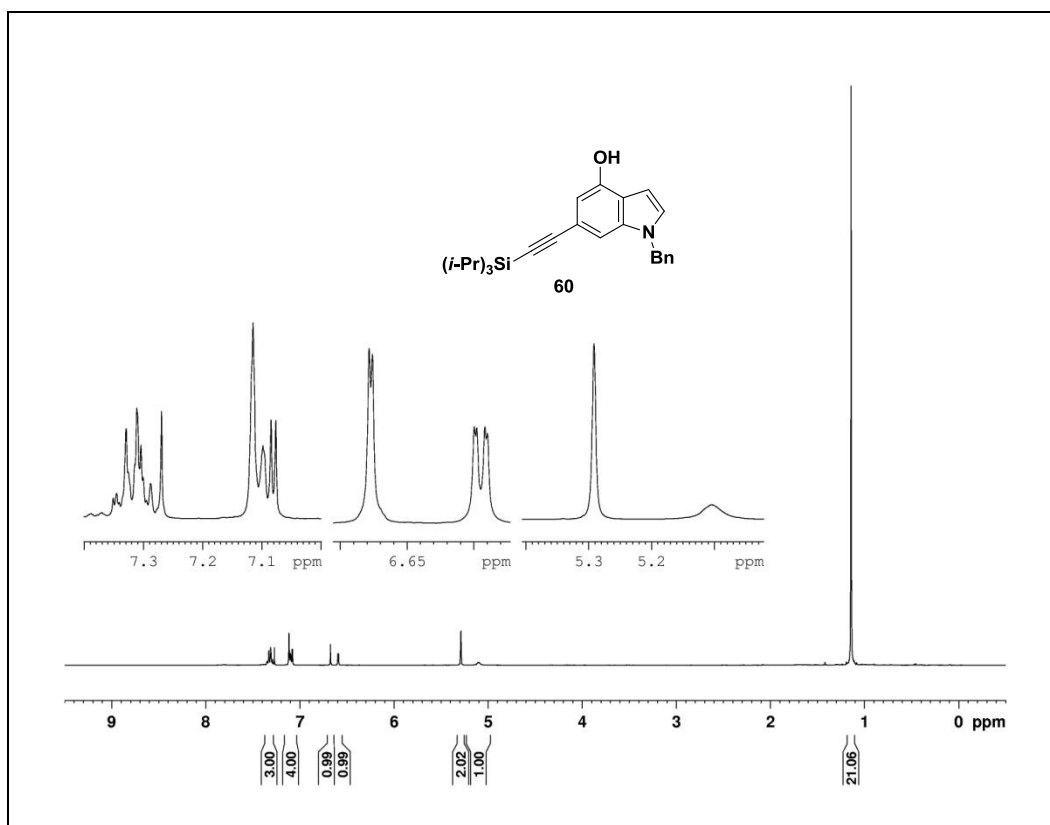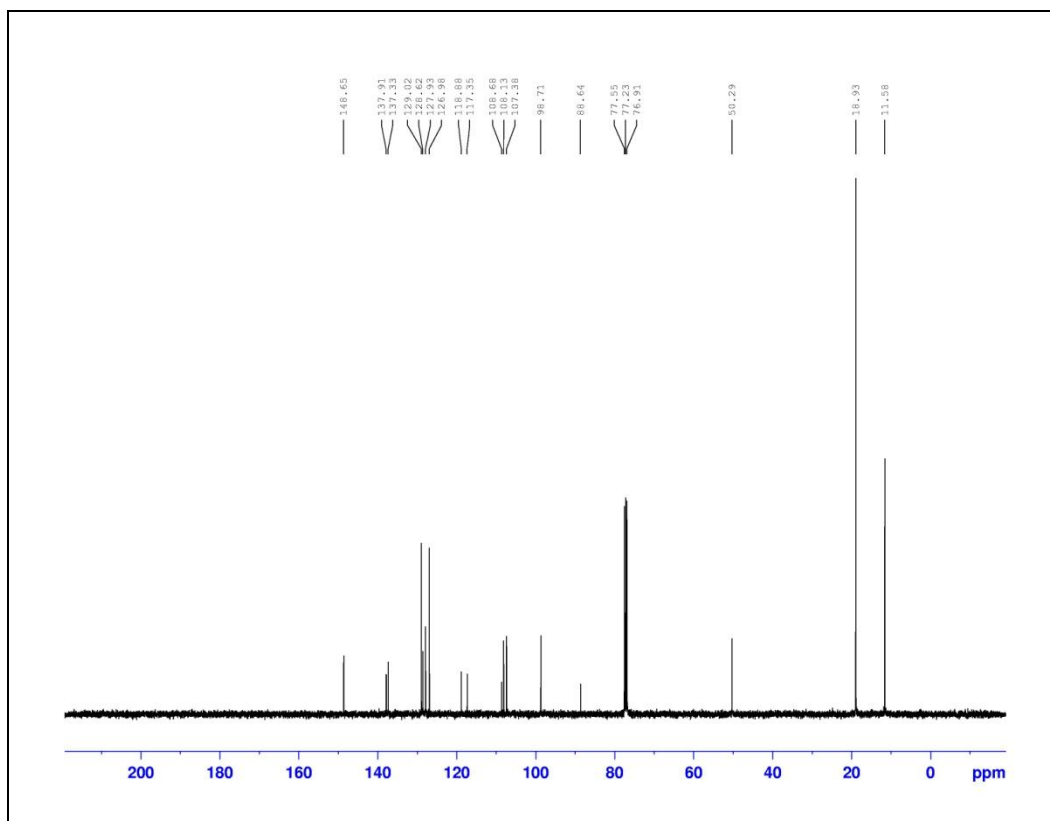

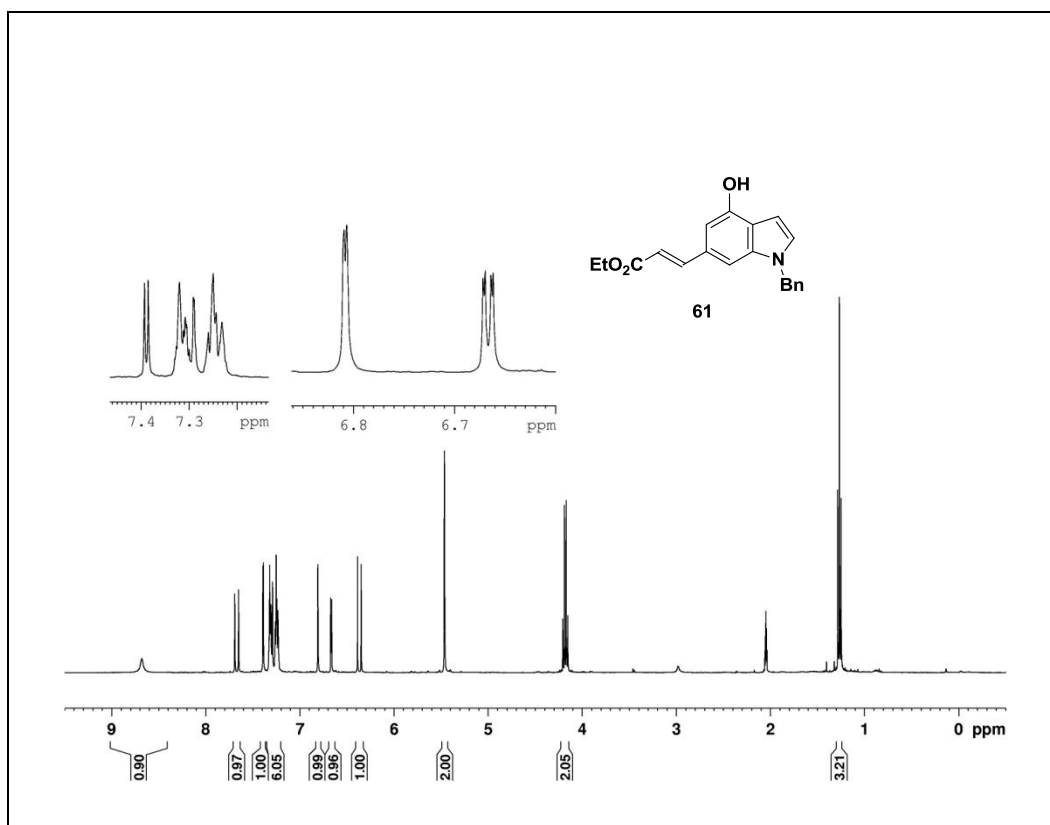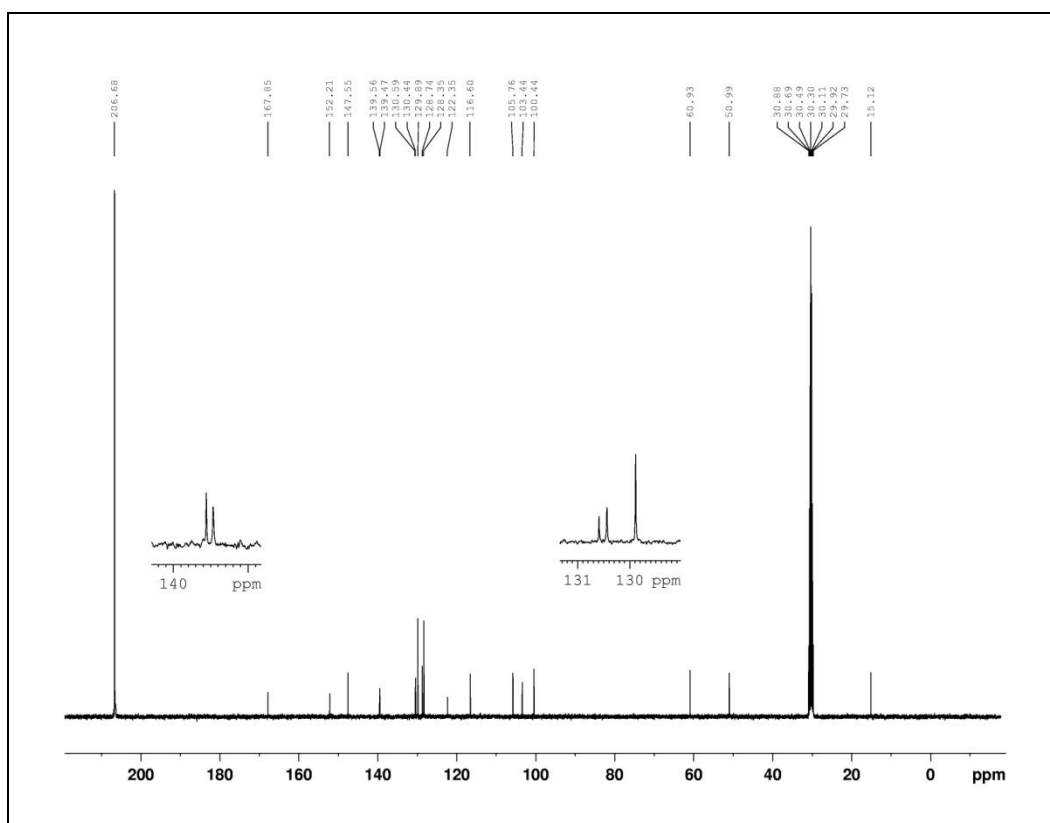

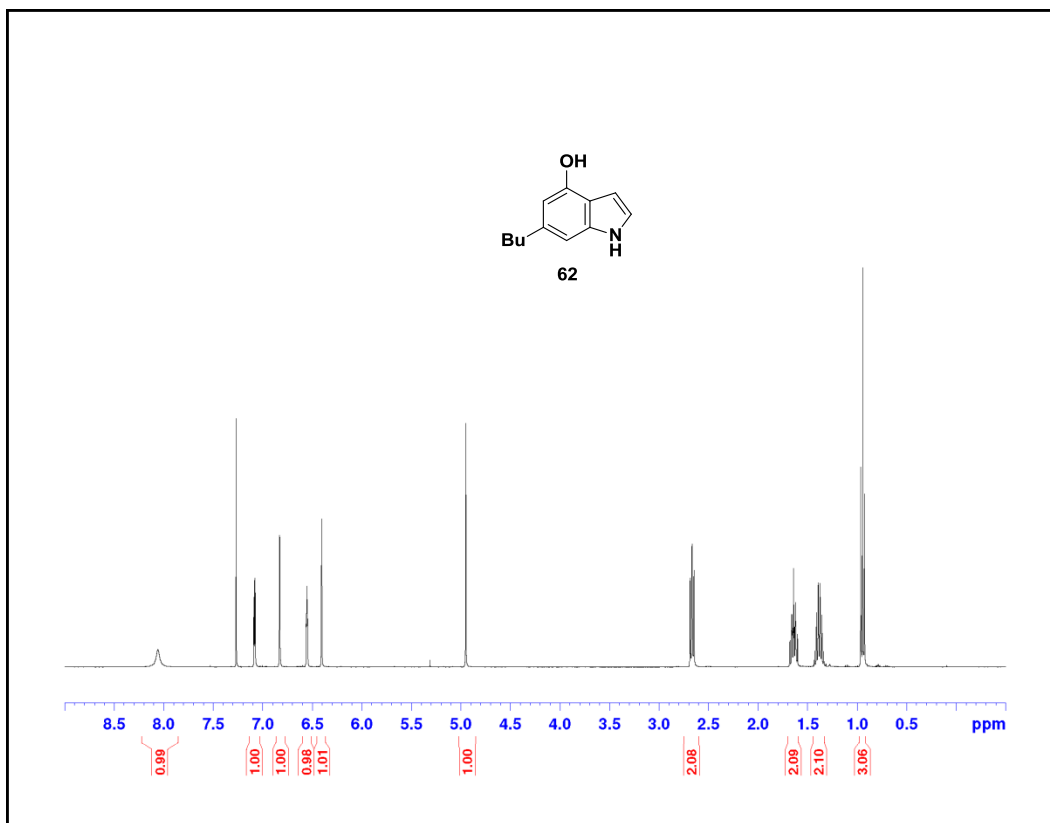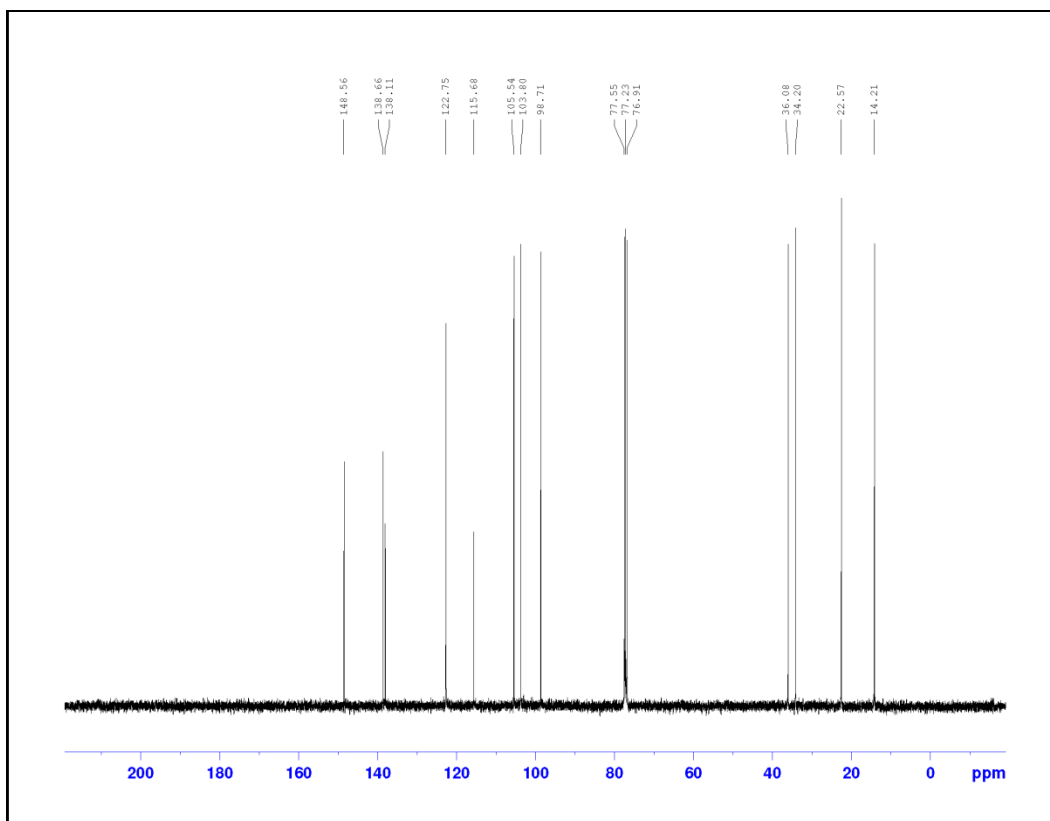

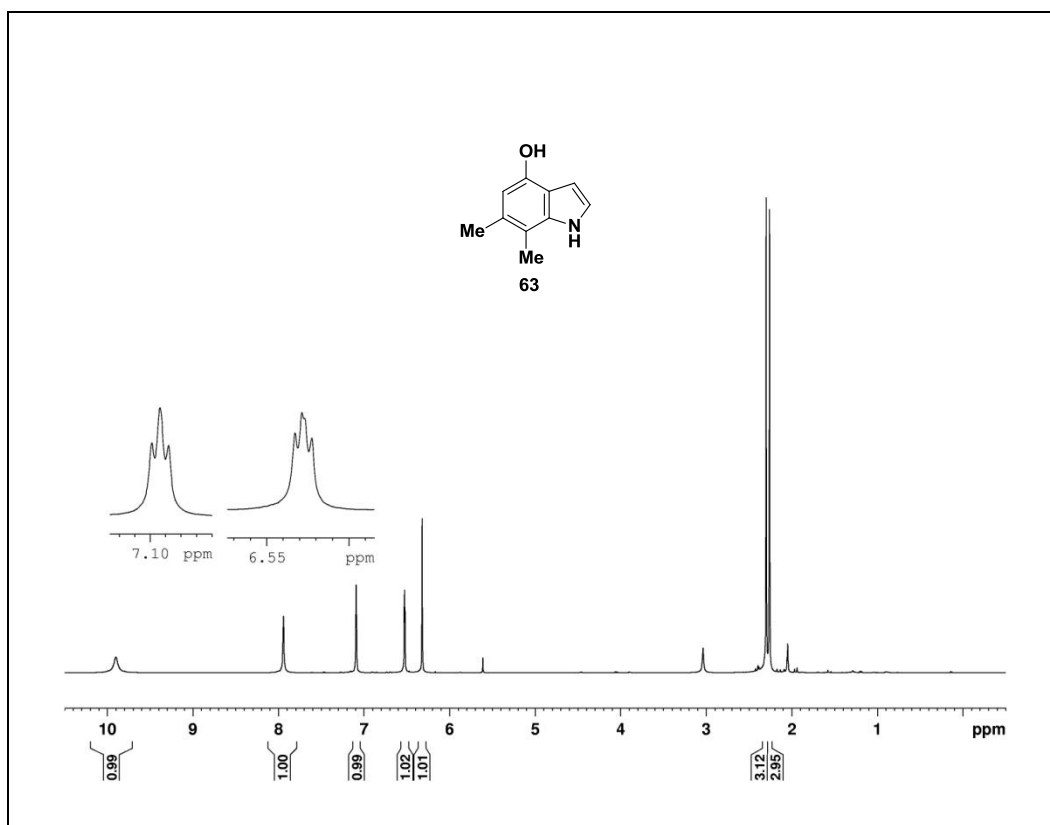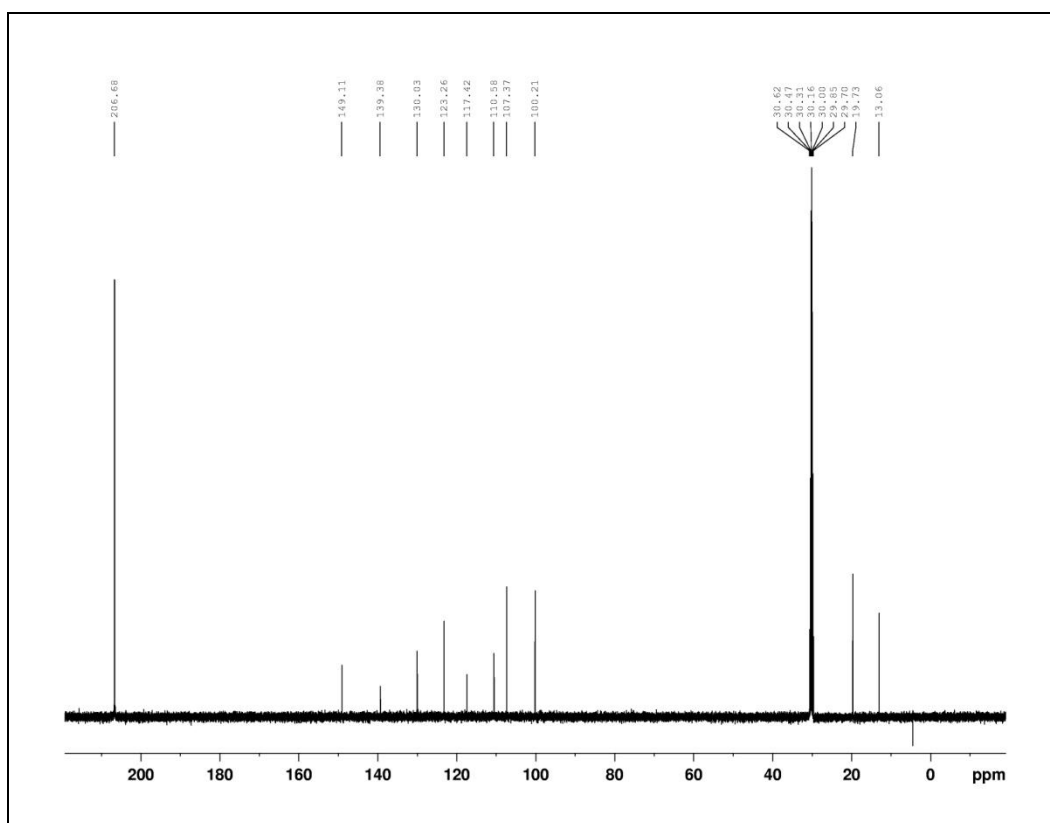

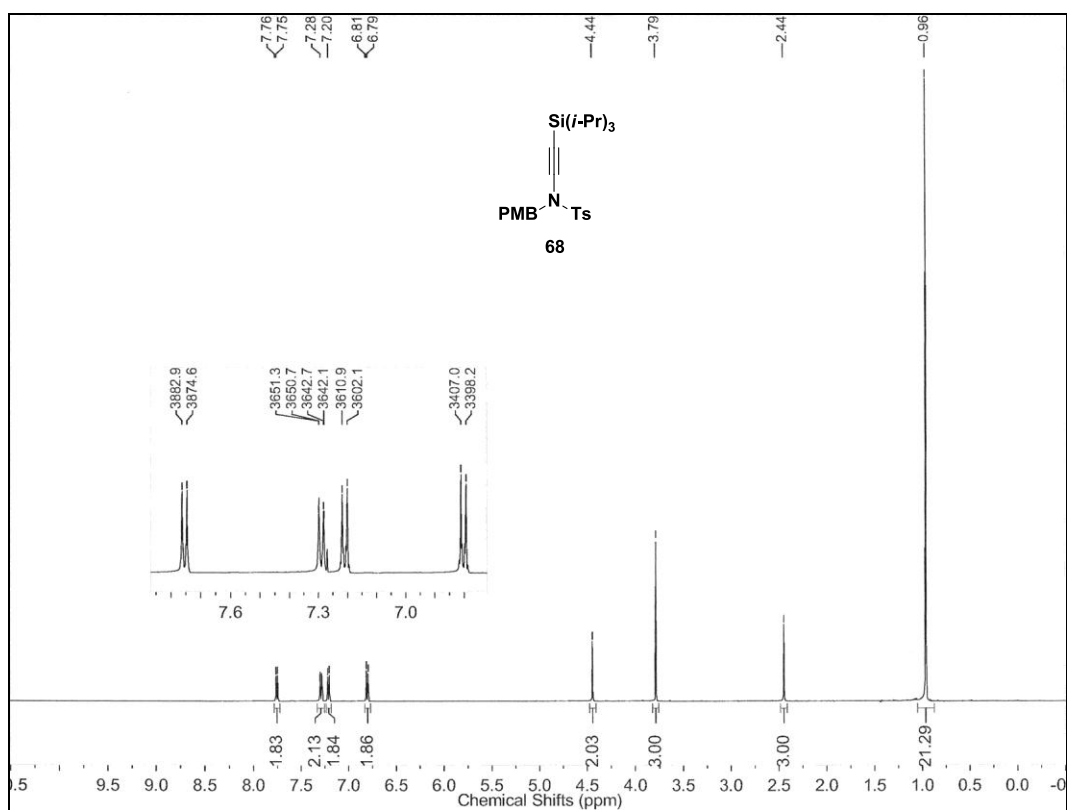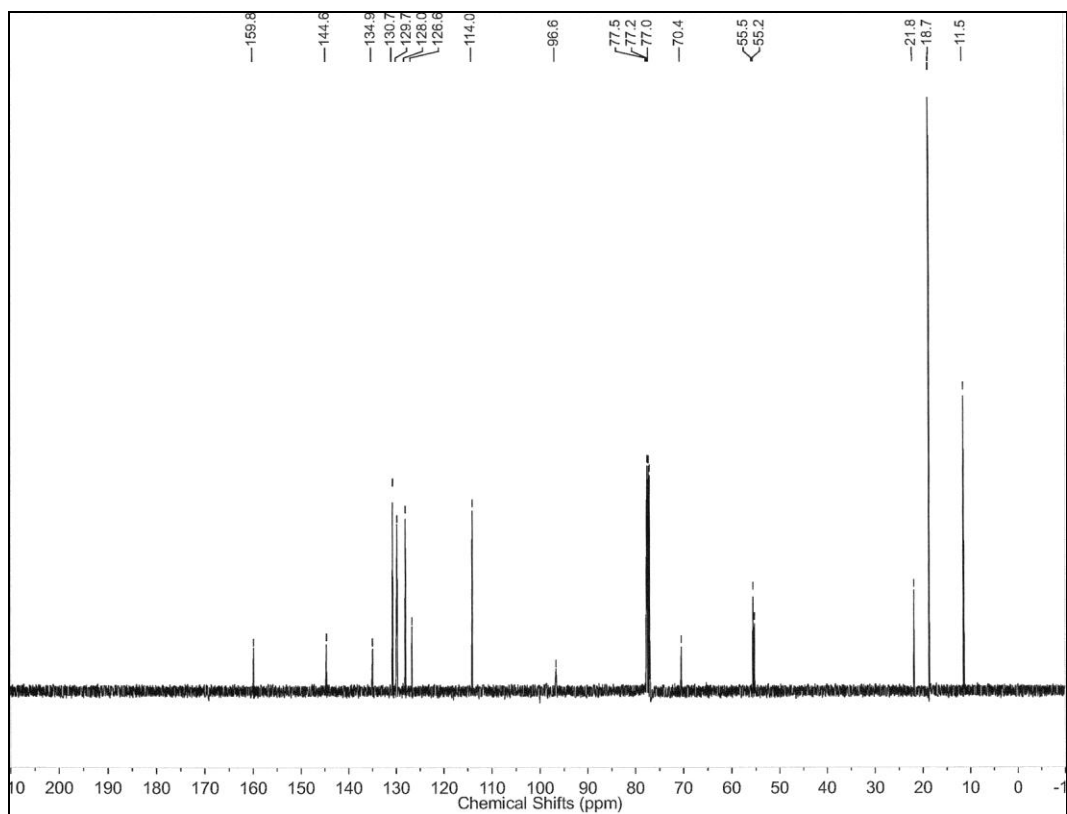

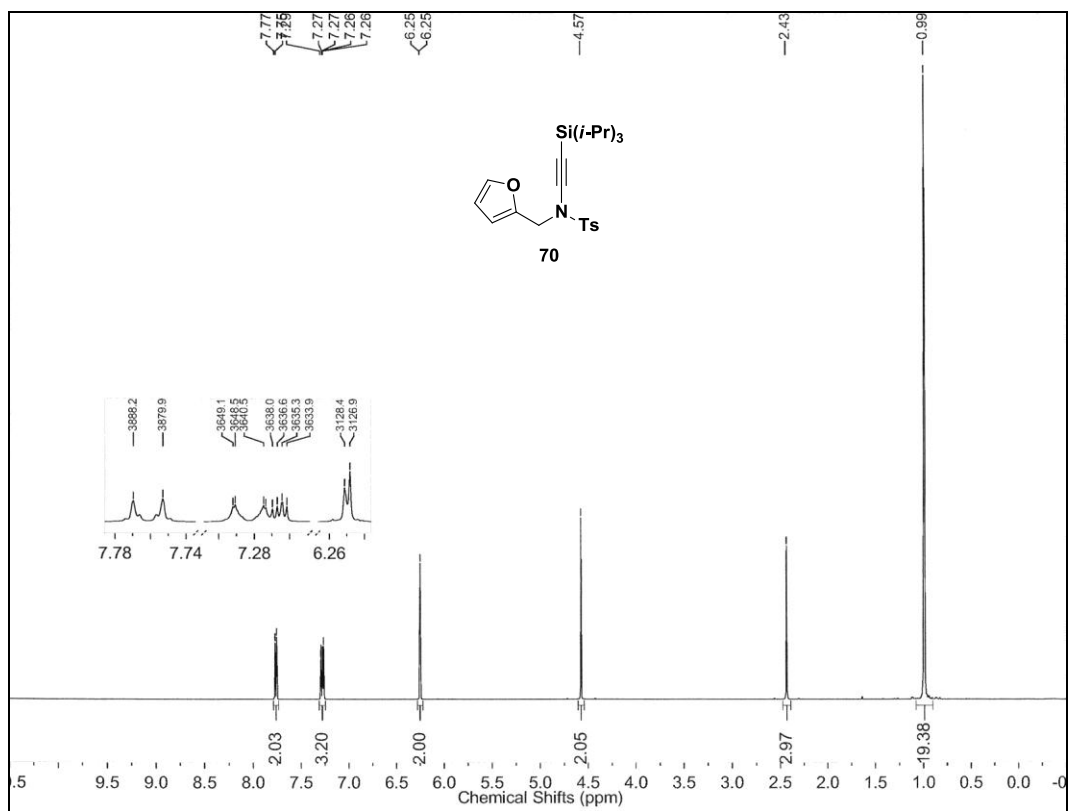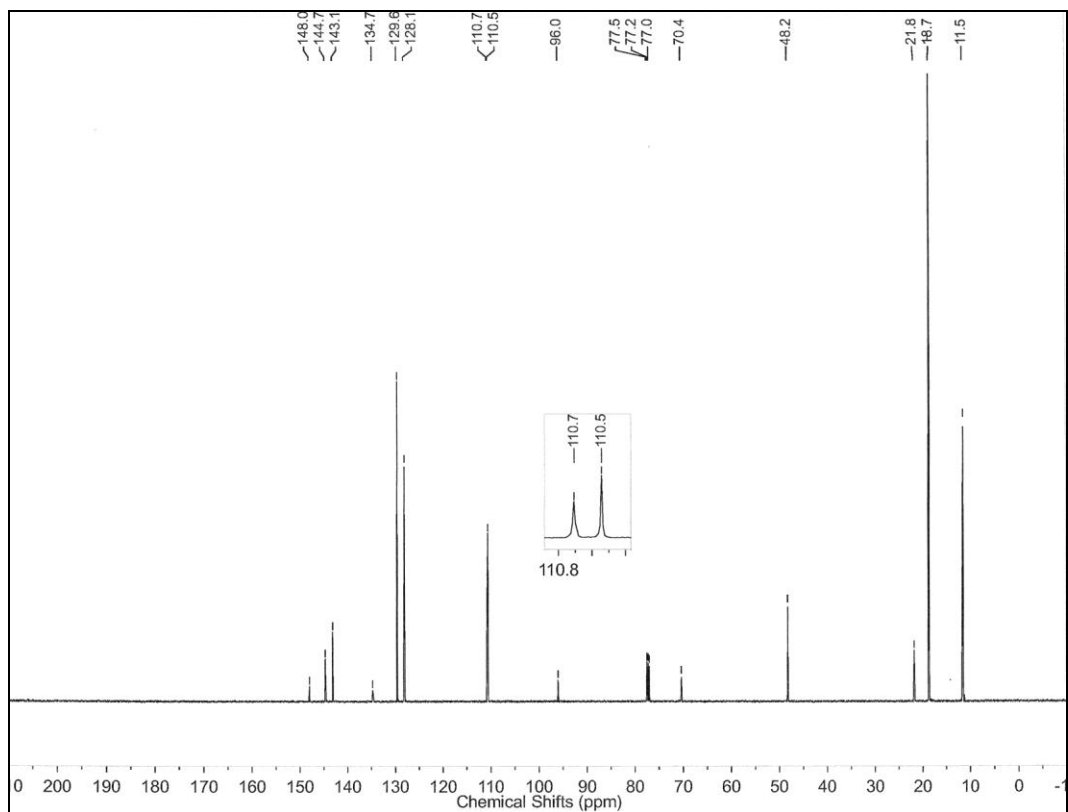

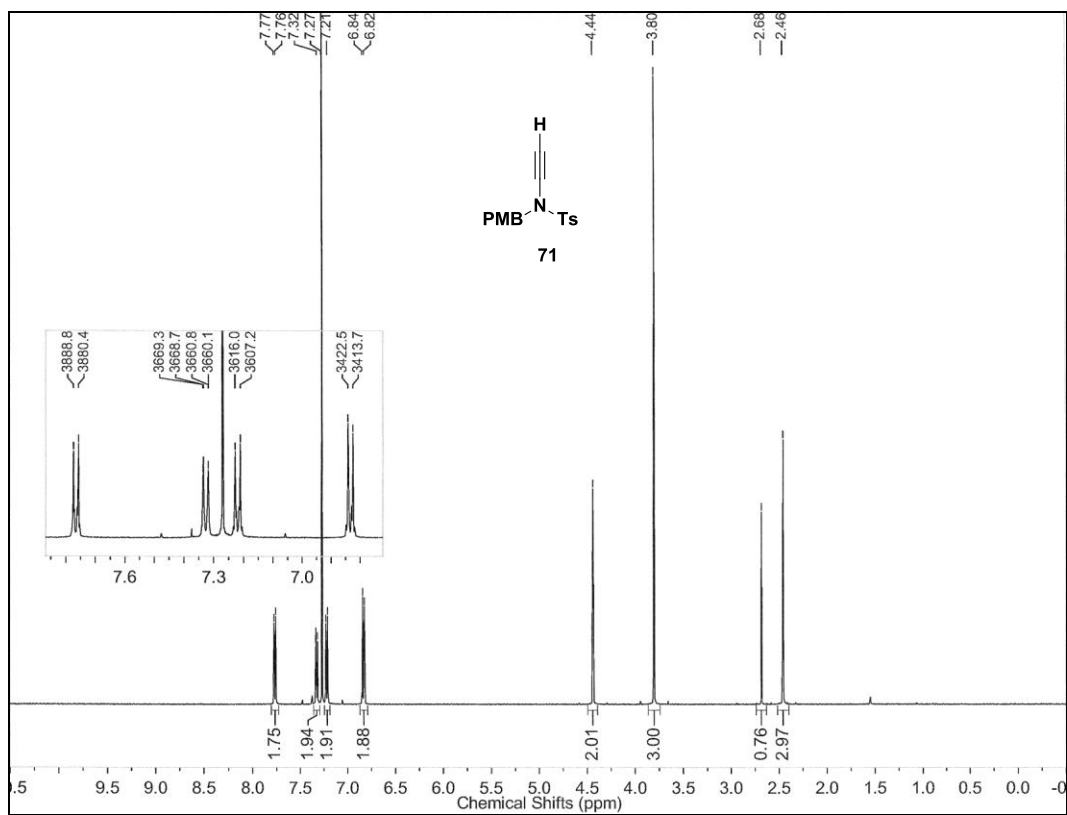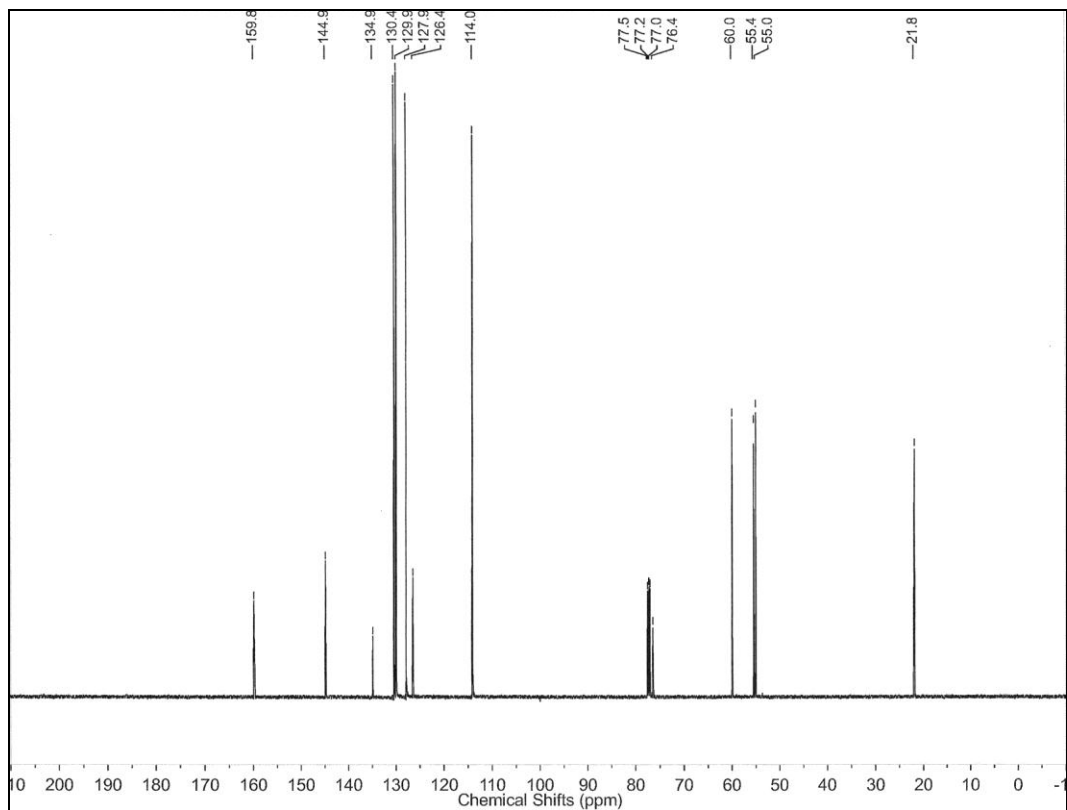



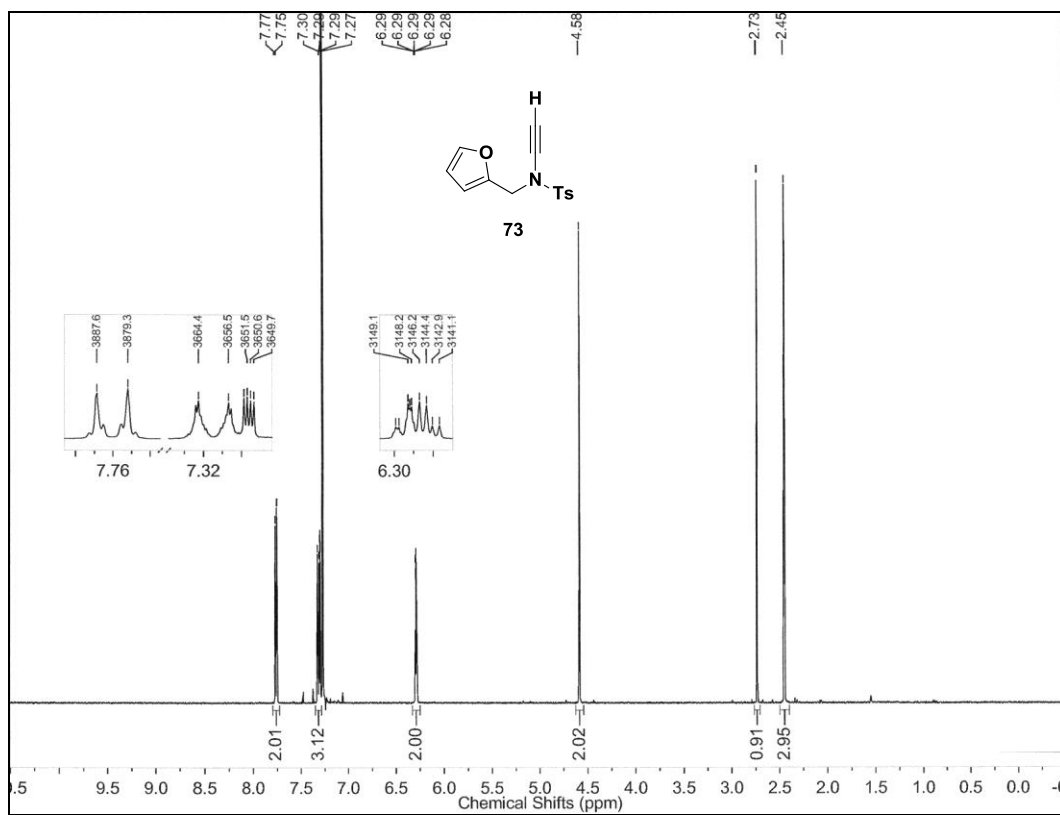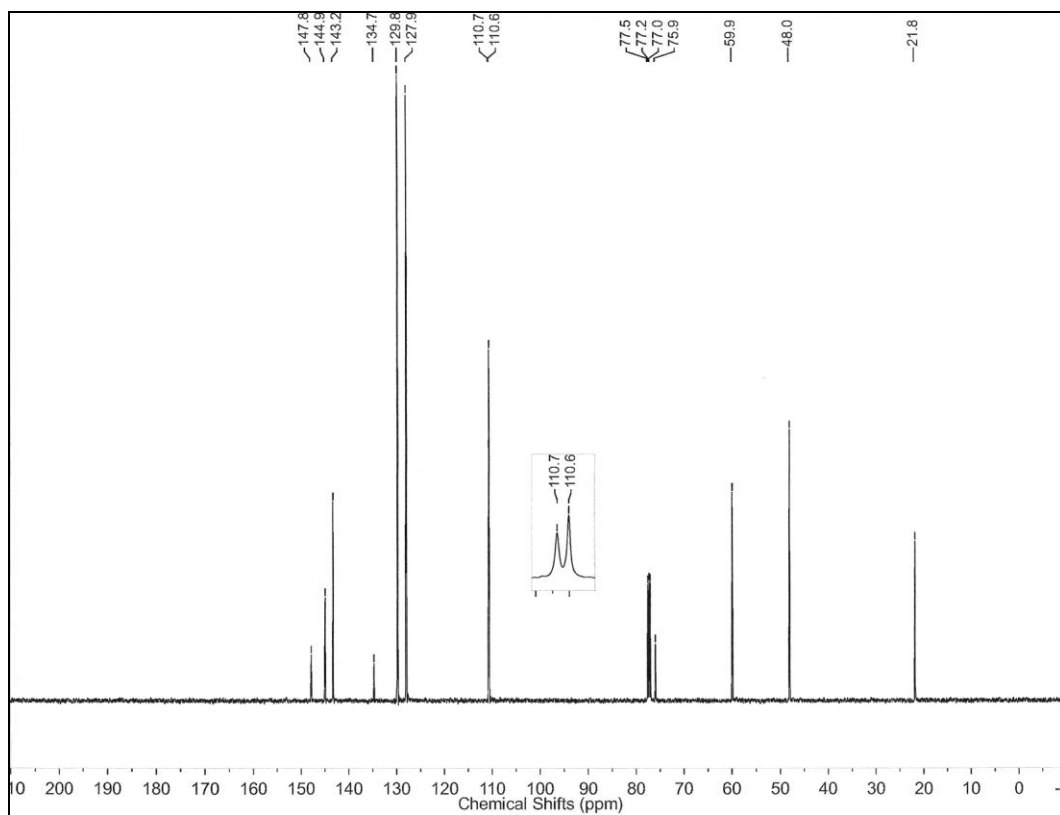

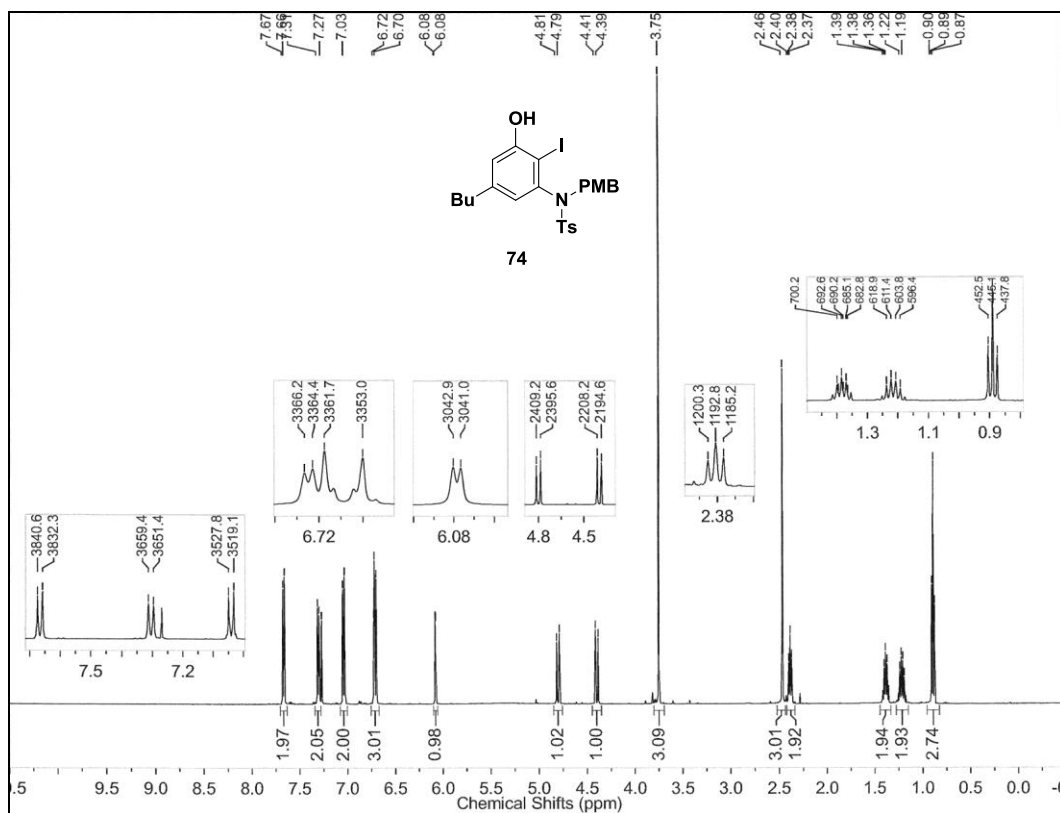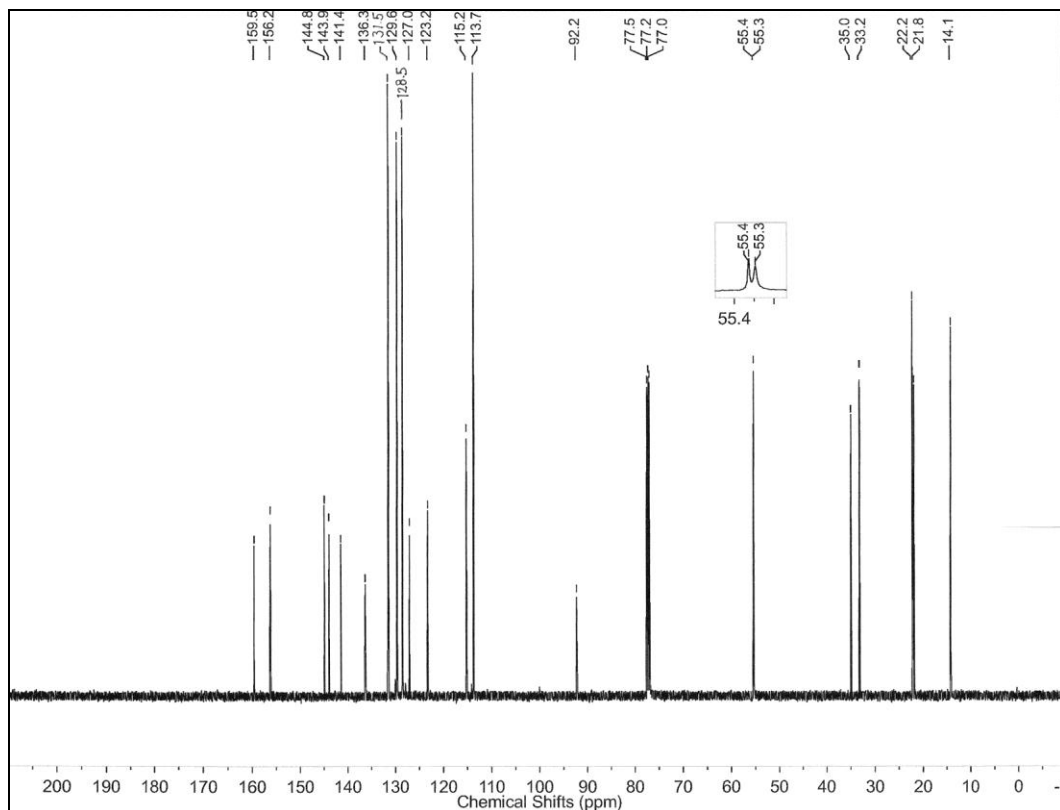

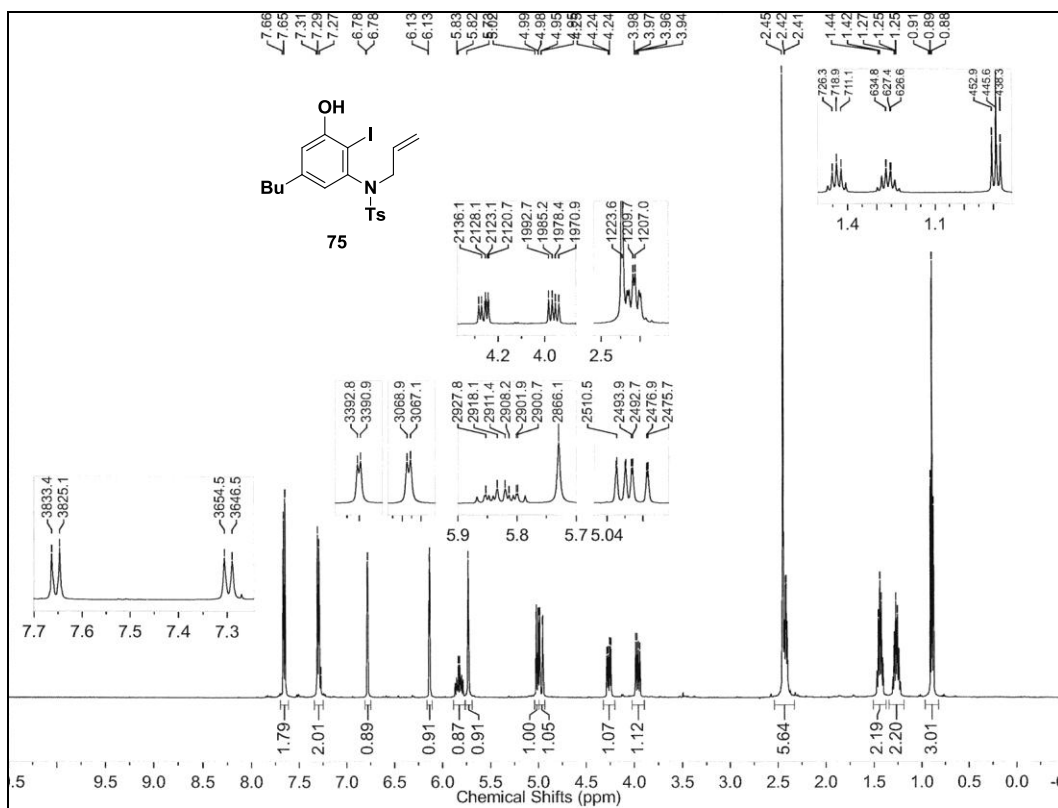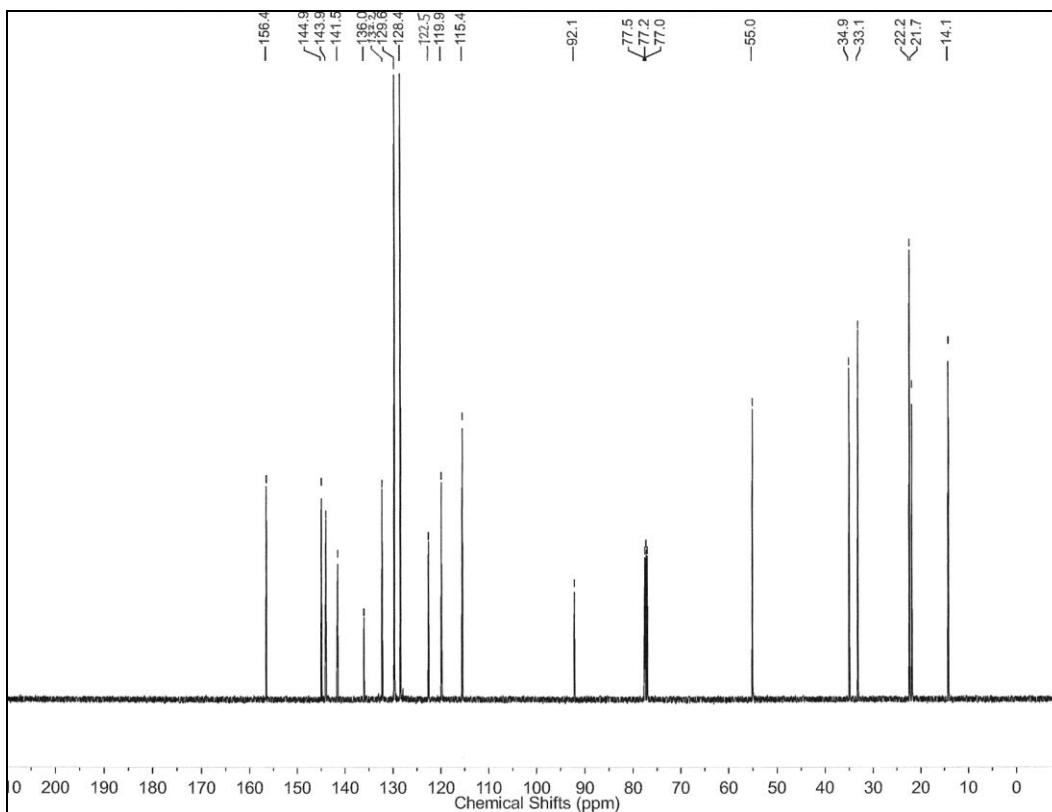

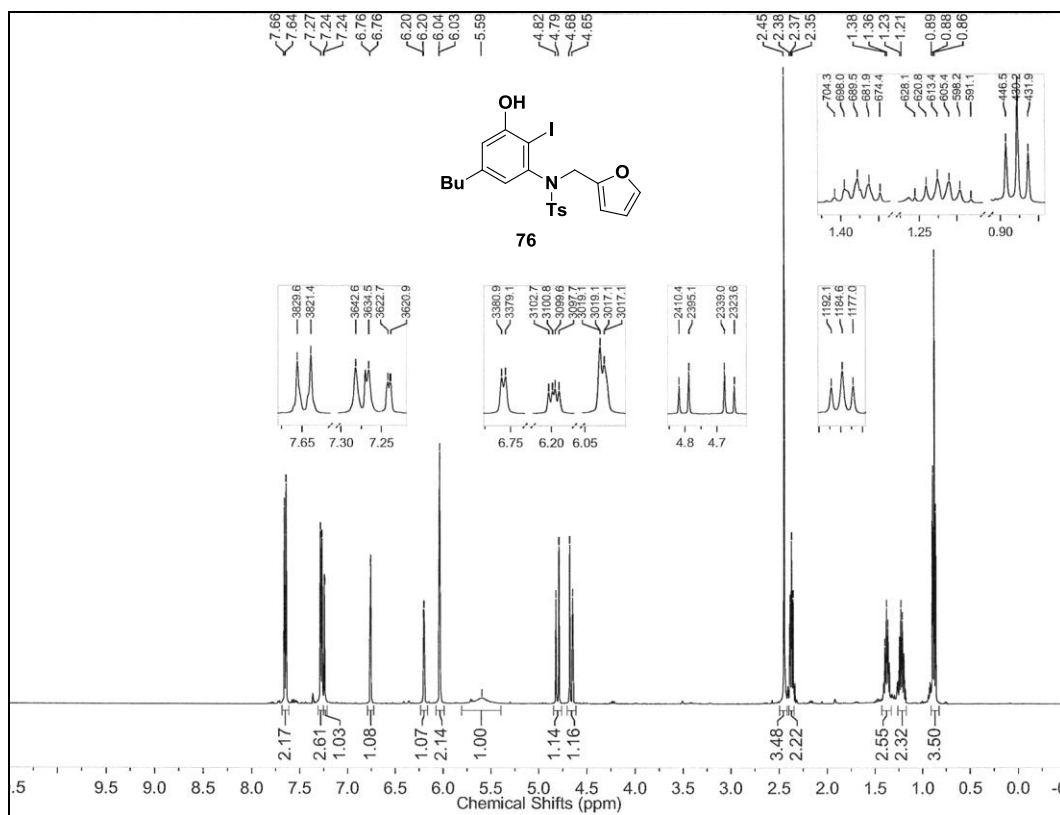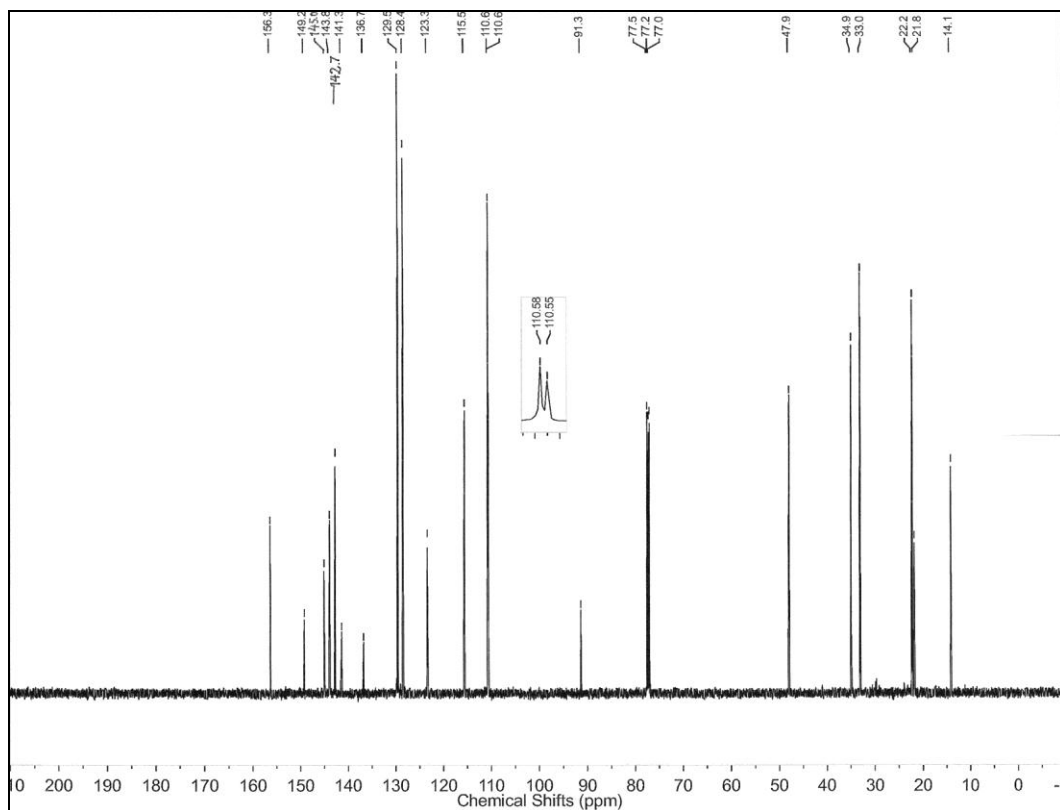

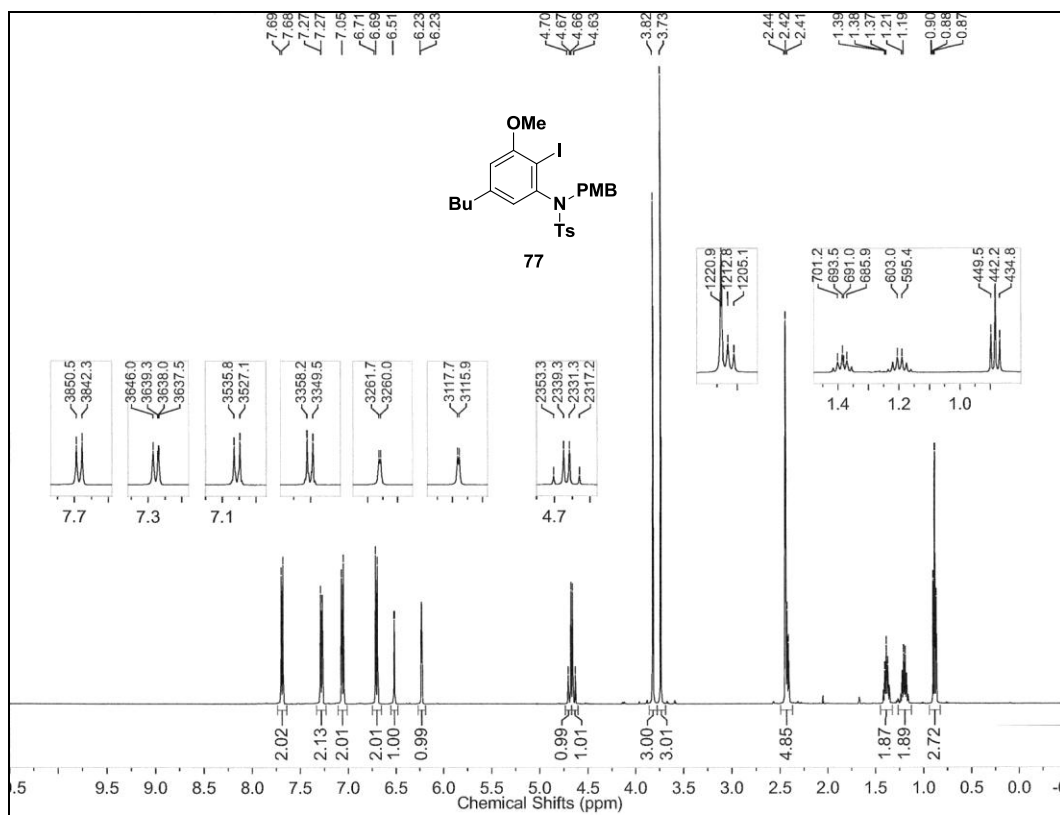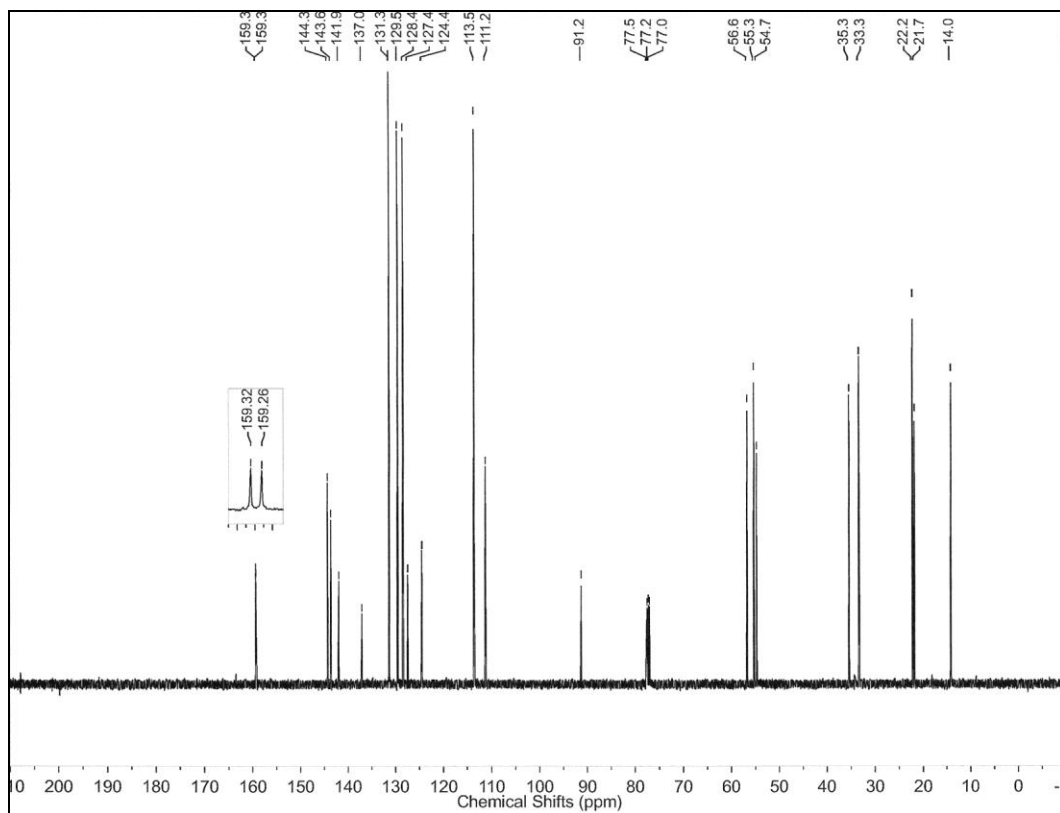

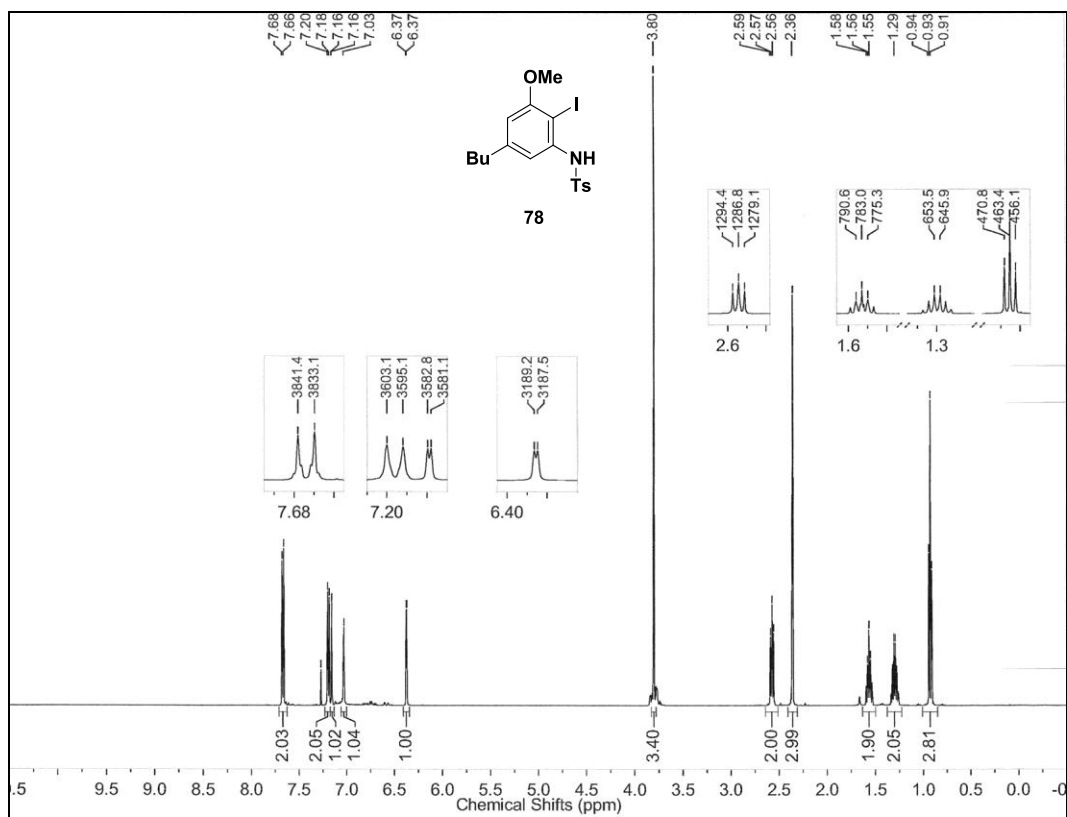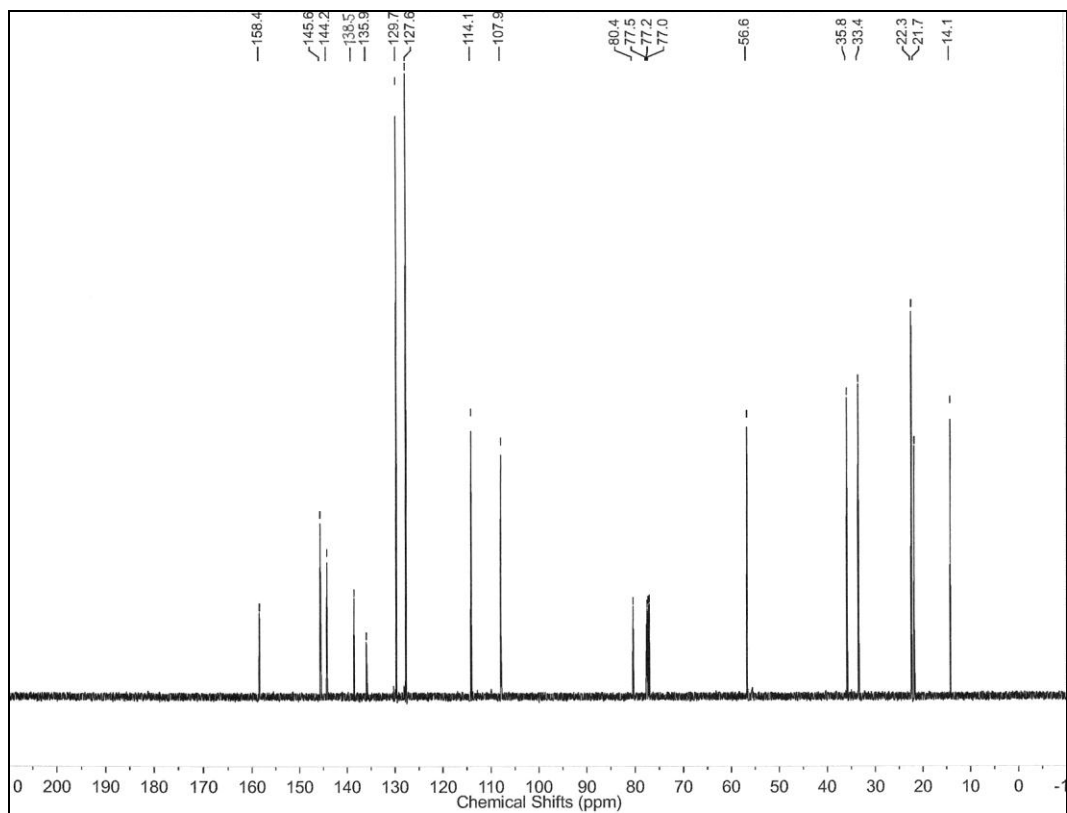

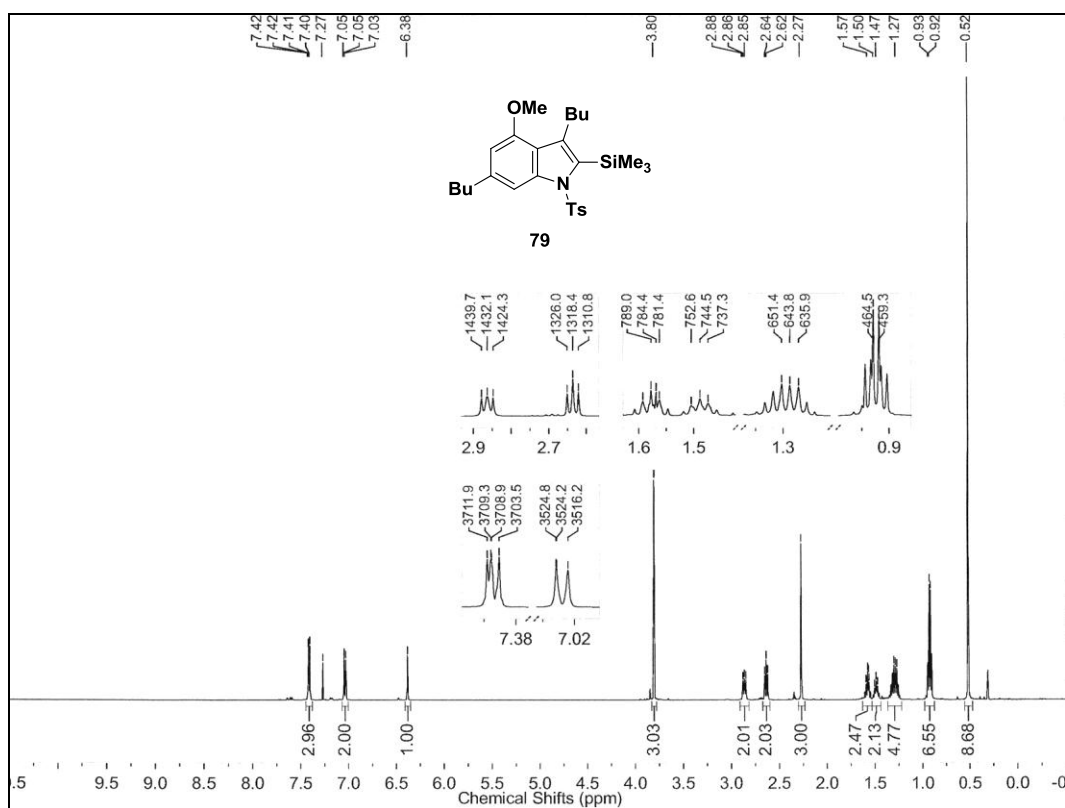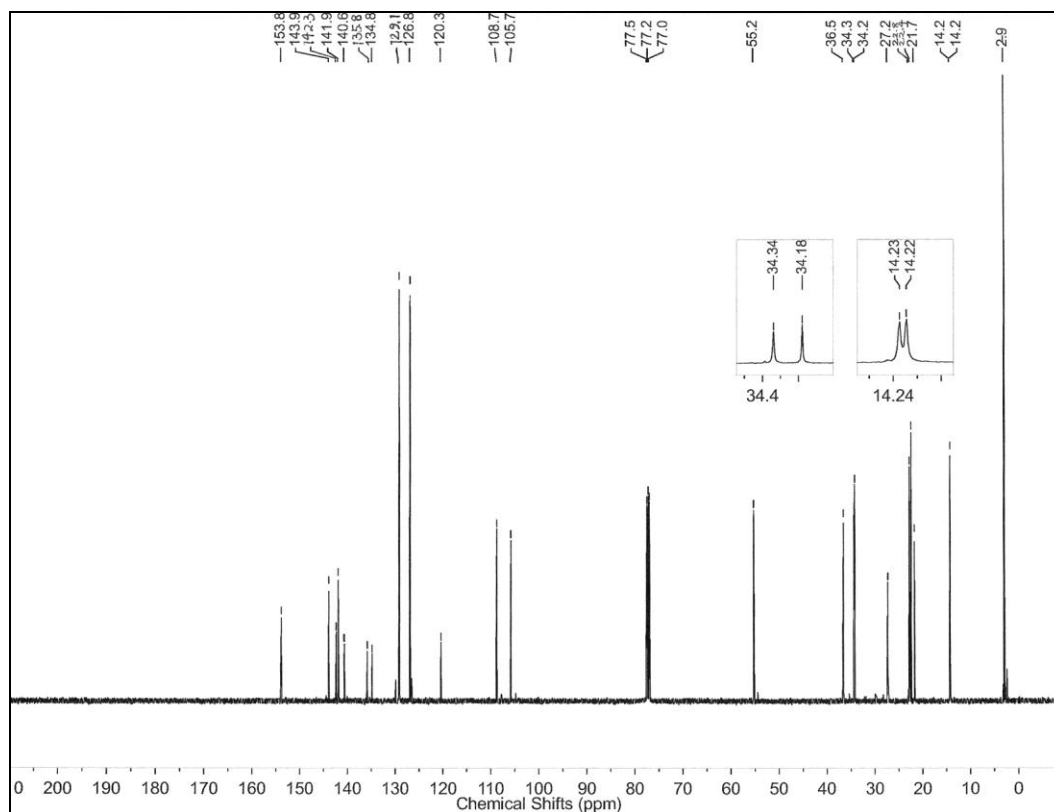

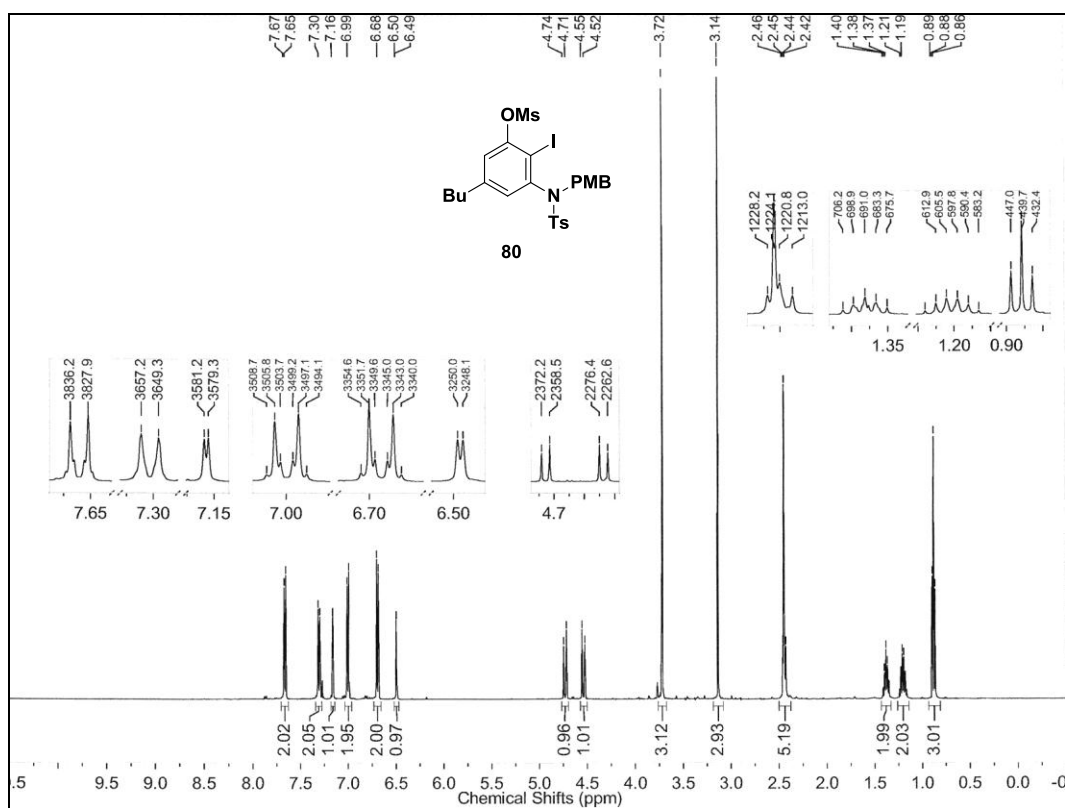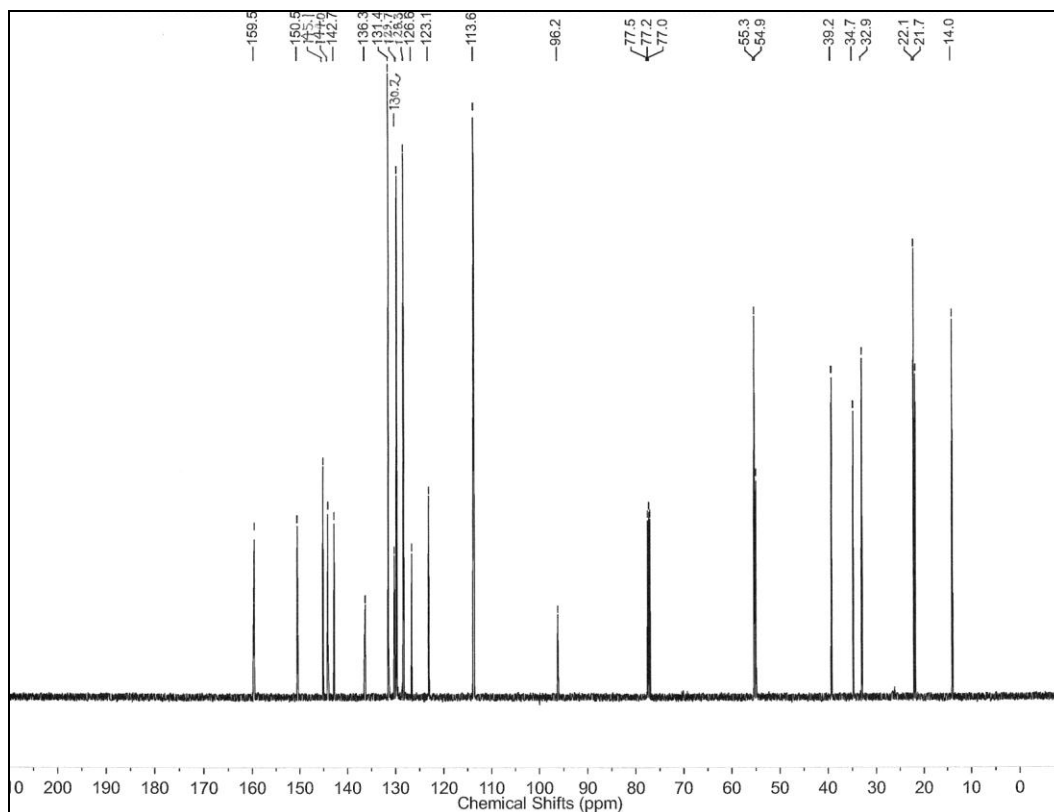



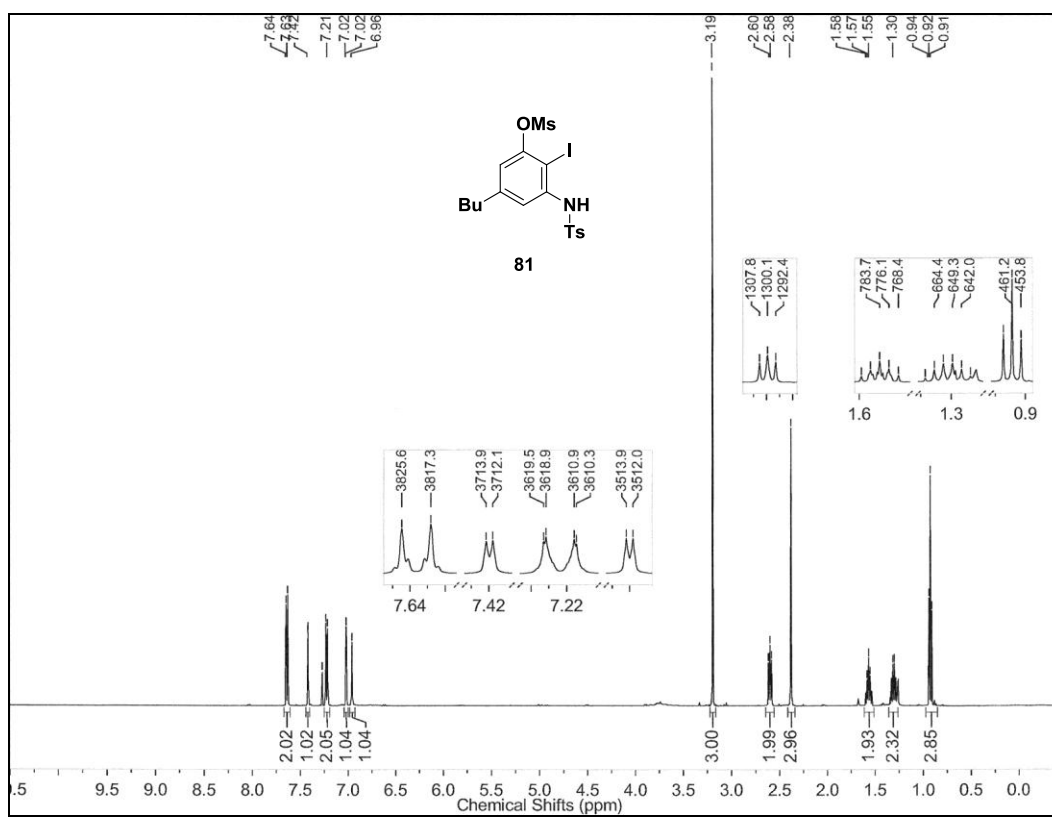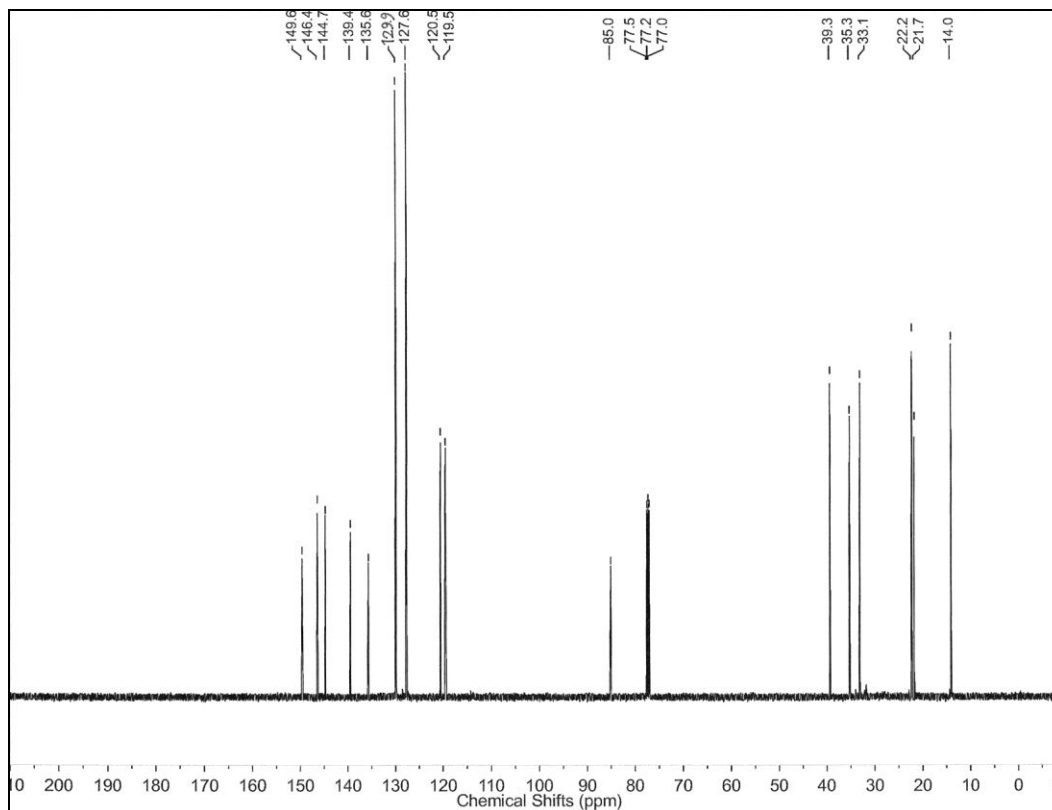

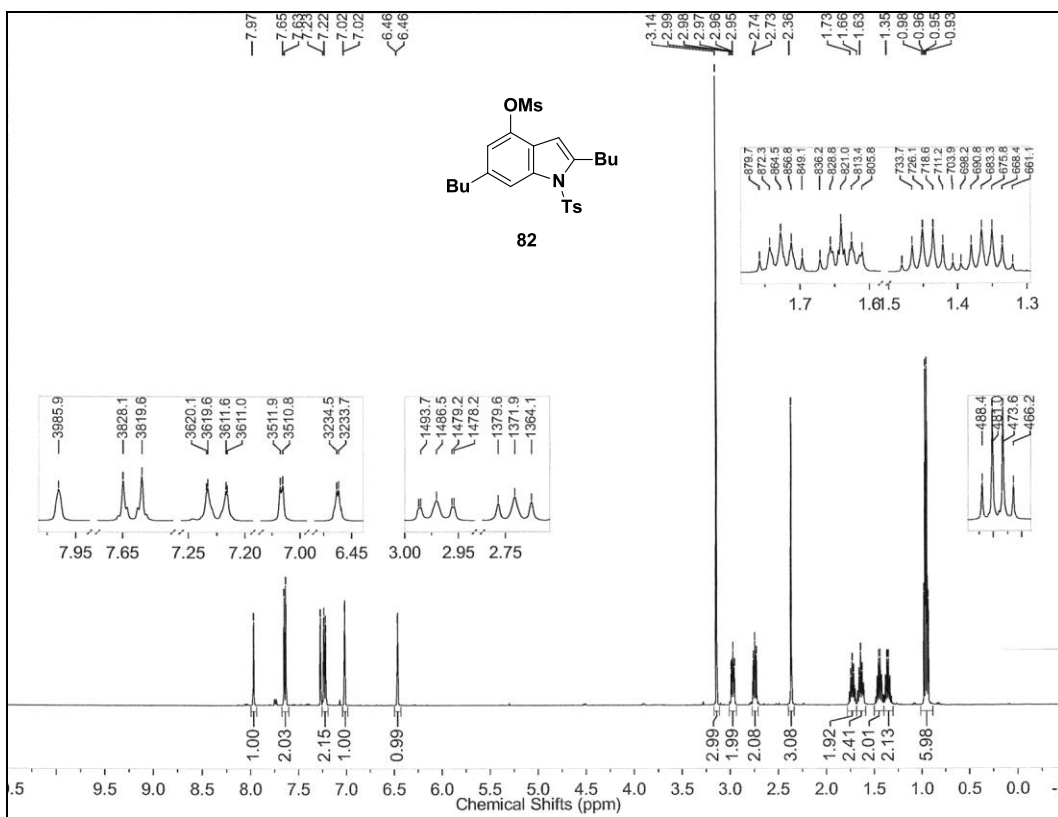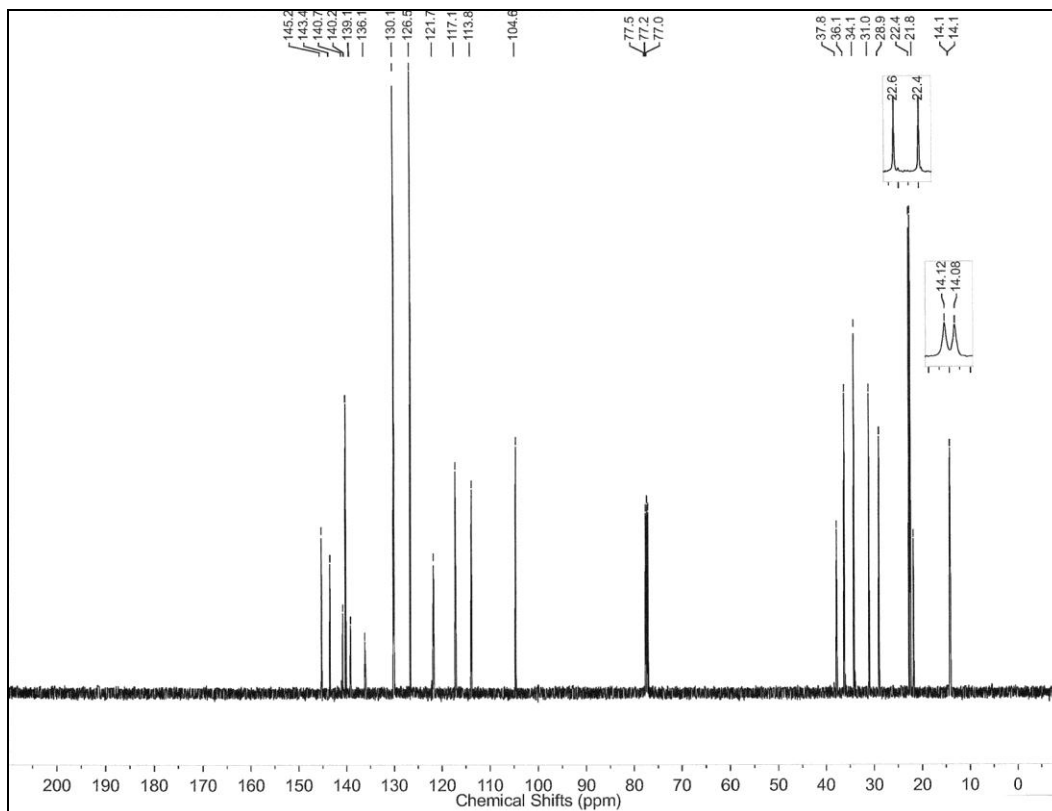

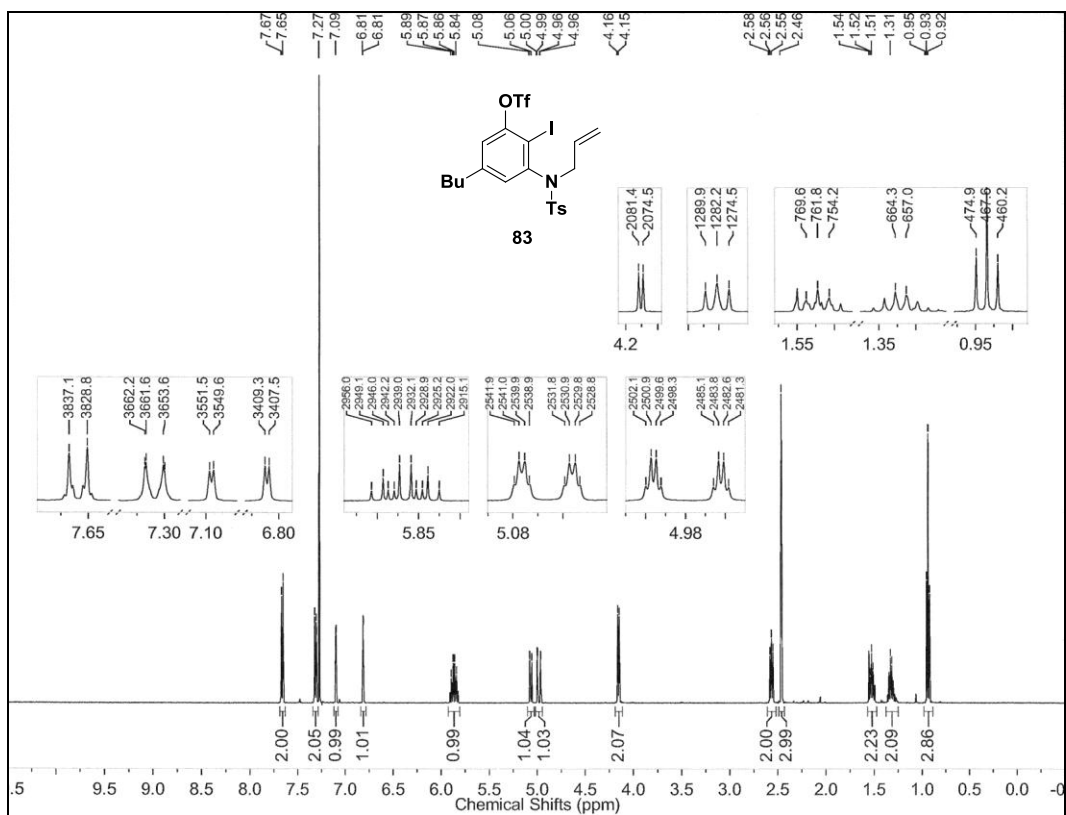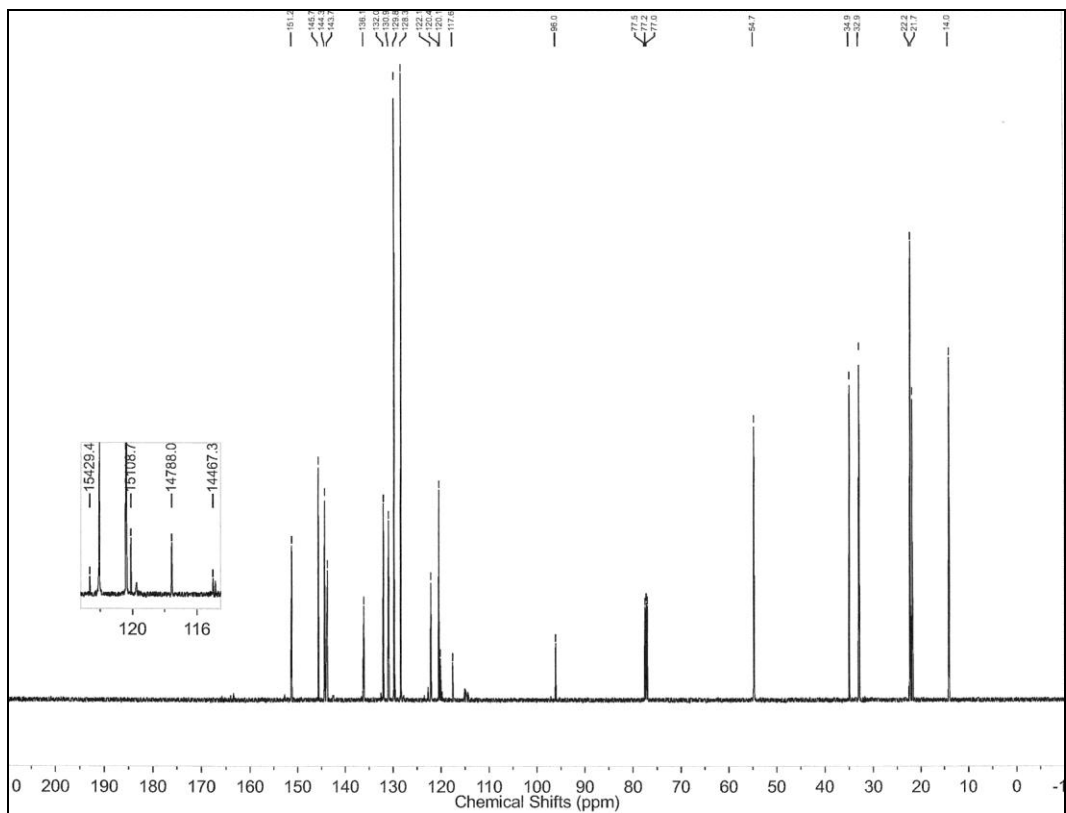

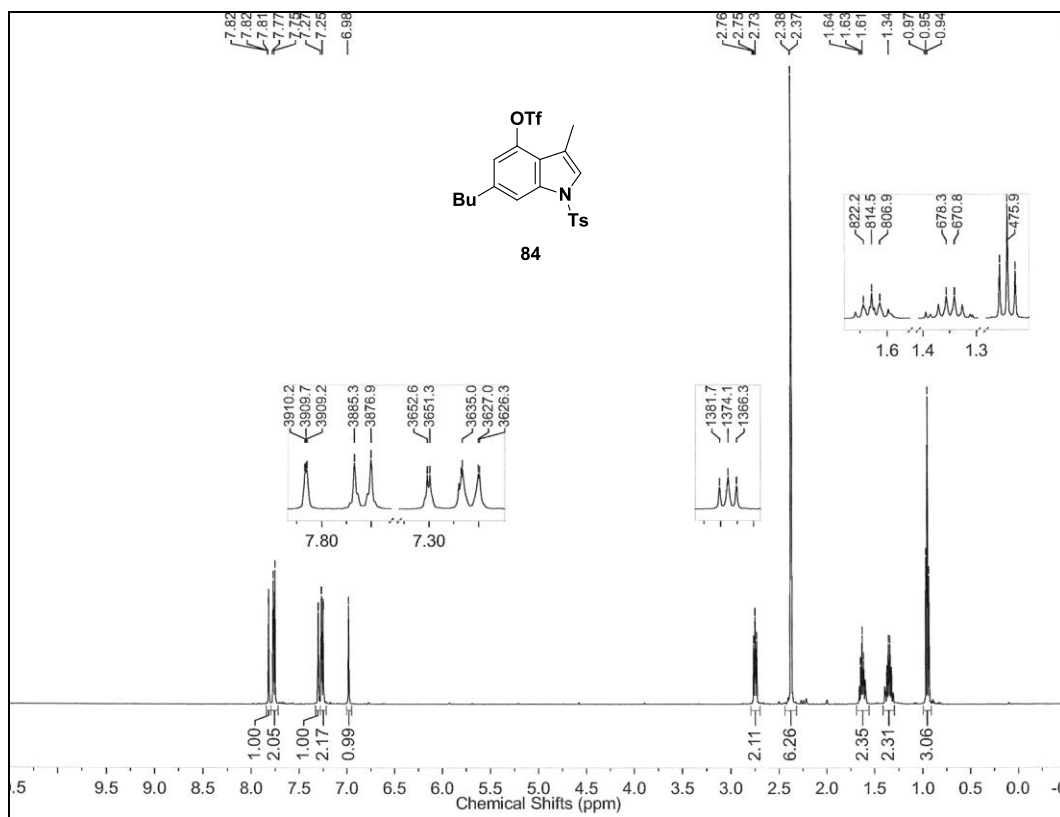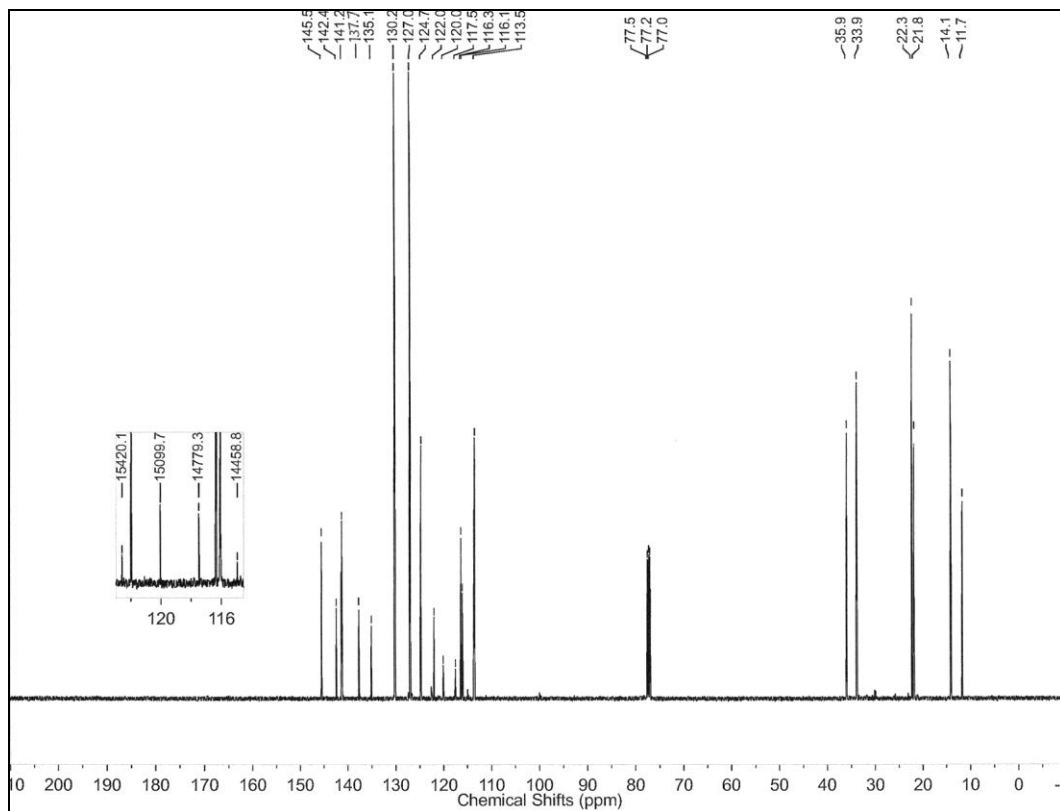

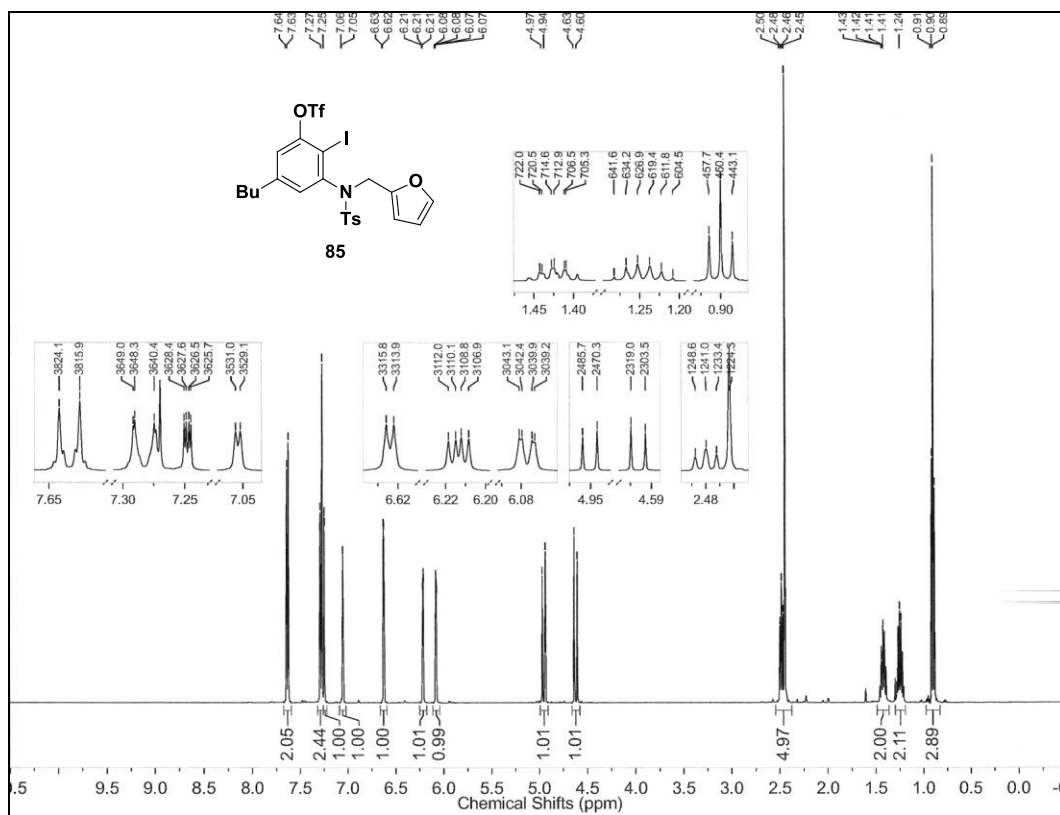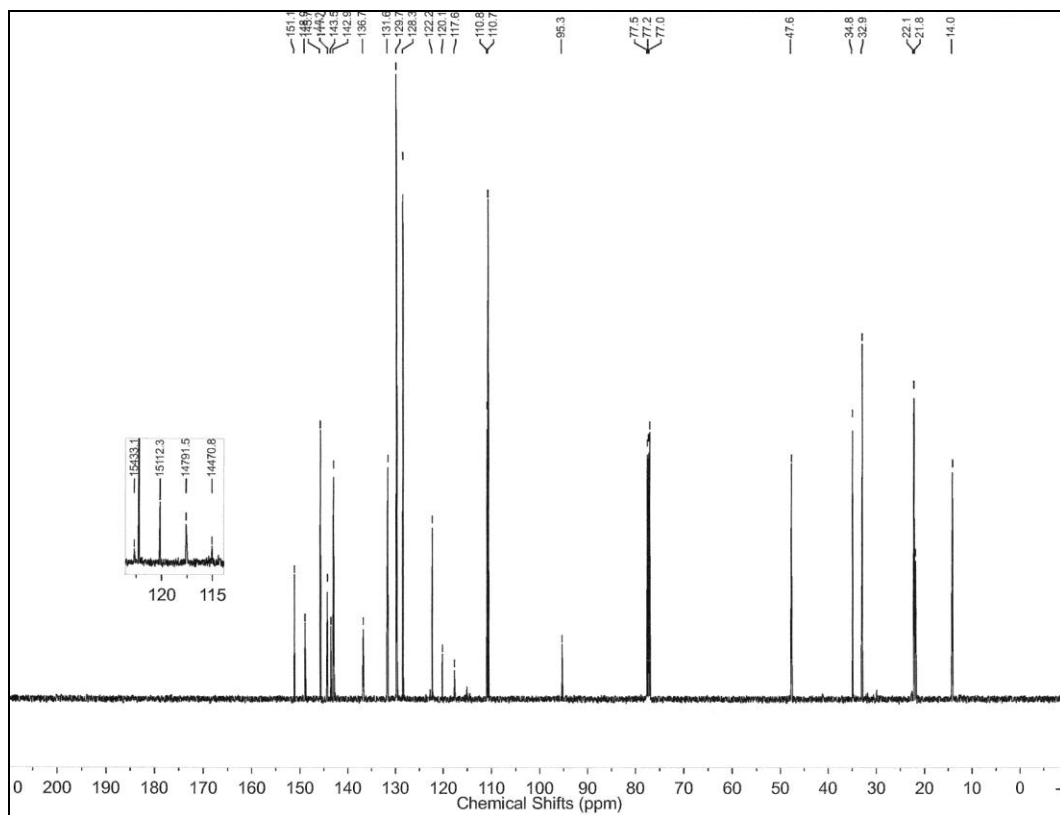

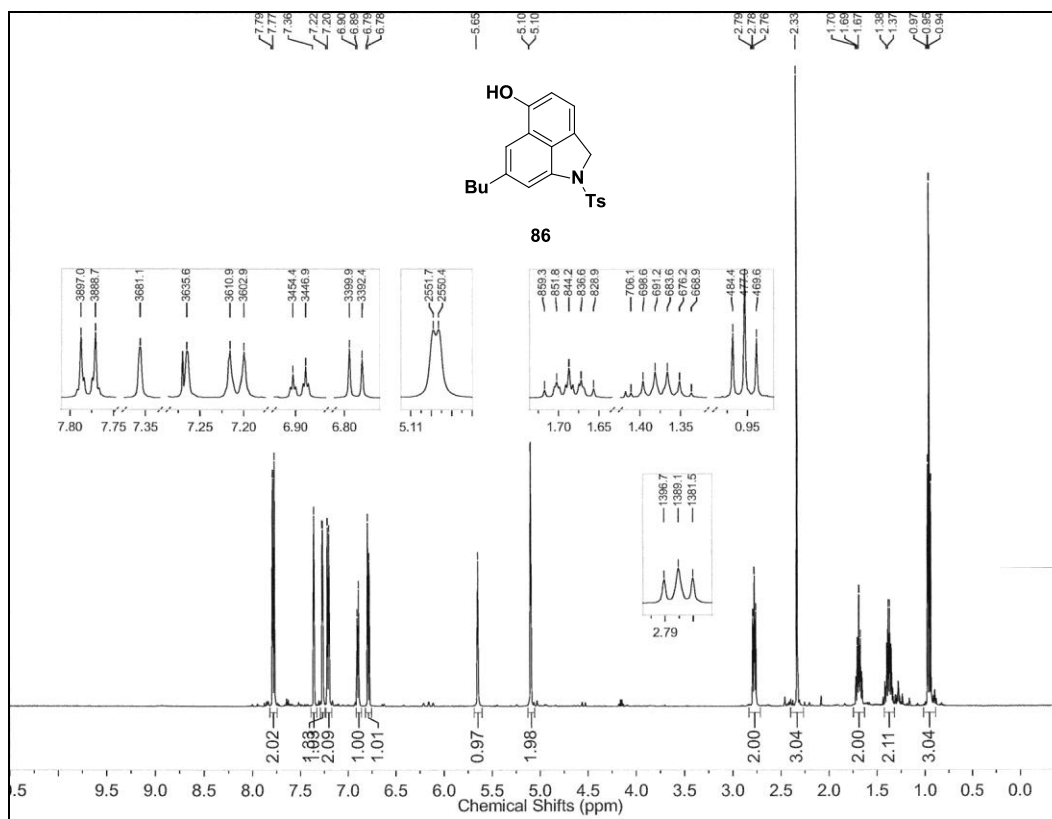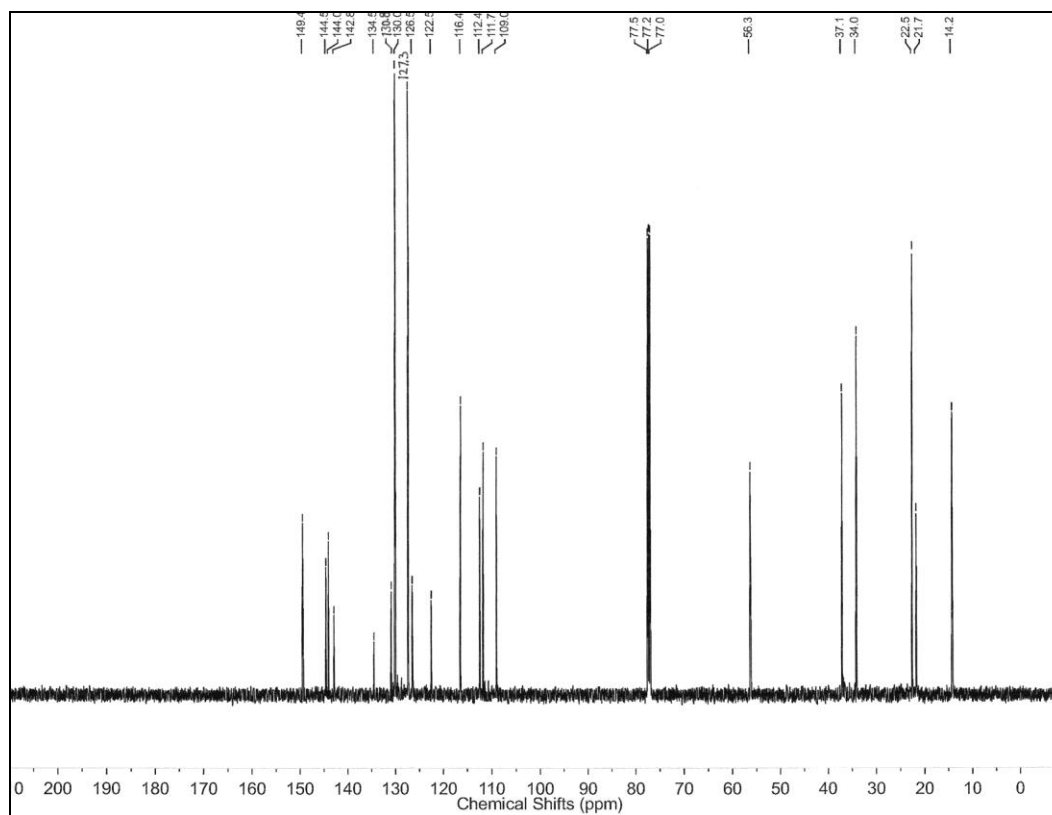

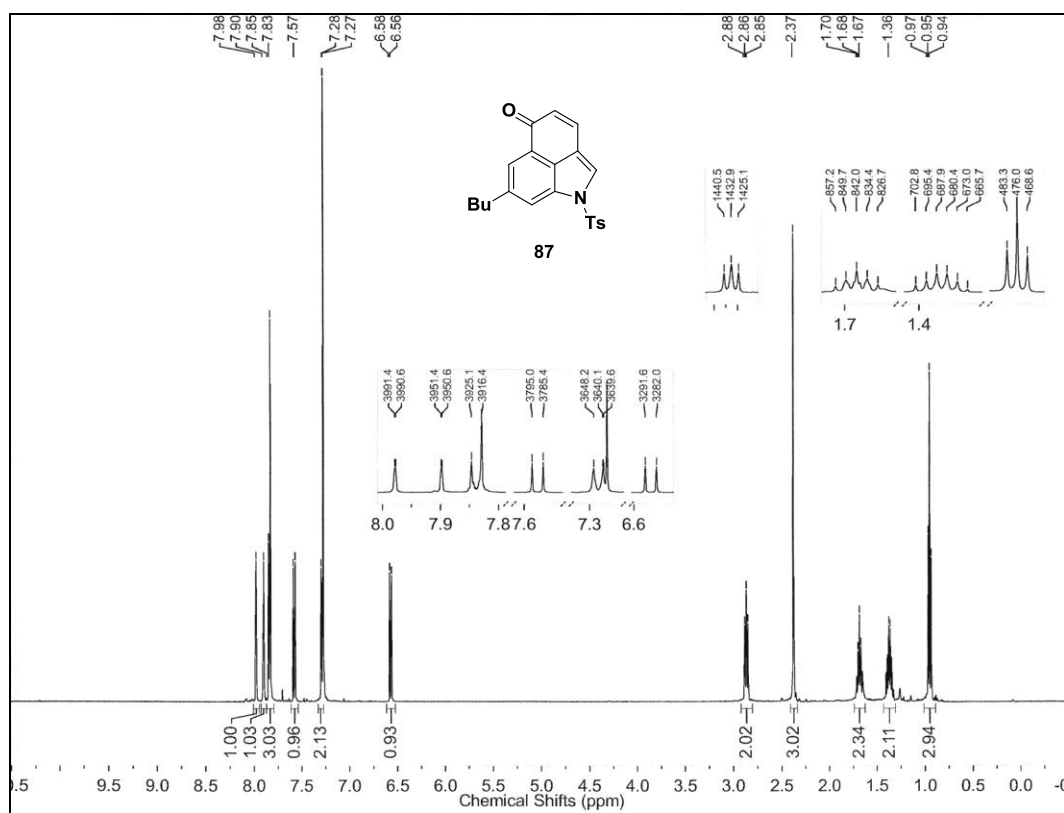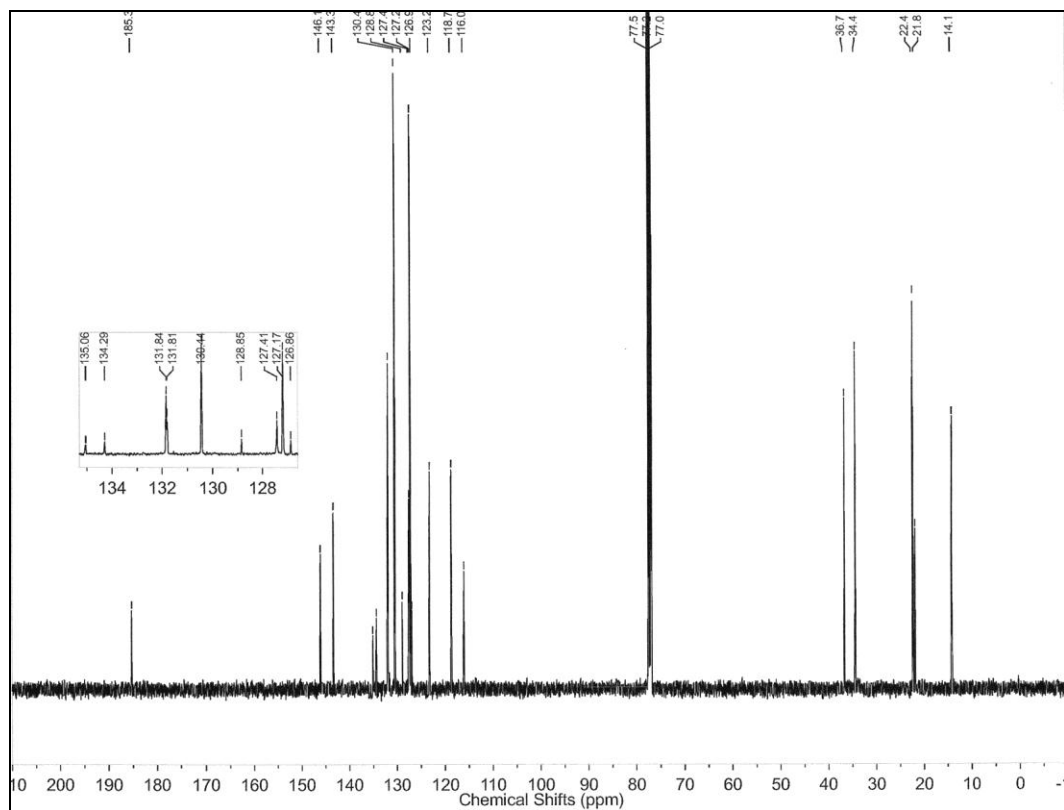

Supplement: NIHMS522467-supplement-1_si_001.pdf [file NIHMS522467-supplement-1_si_001.pdf]
